# Supplementary material for: Differential Expression of miRNAs in Response to Topping in Flue-Cured Tobacco (Nicotiana tabacum) Roots
Source: PubMed Central journal article supplement (PMC3237444; doi:10.1371/journal.pone.0028565), 2011-12-14
Supplement: pone.0028565.s001.pdf [file pone.0028565.s001.pdf]

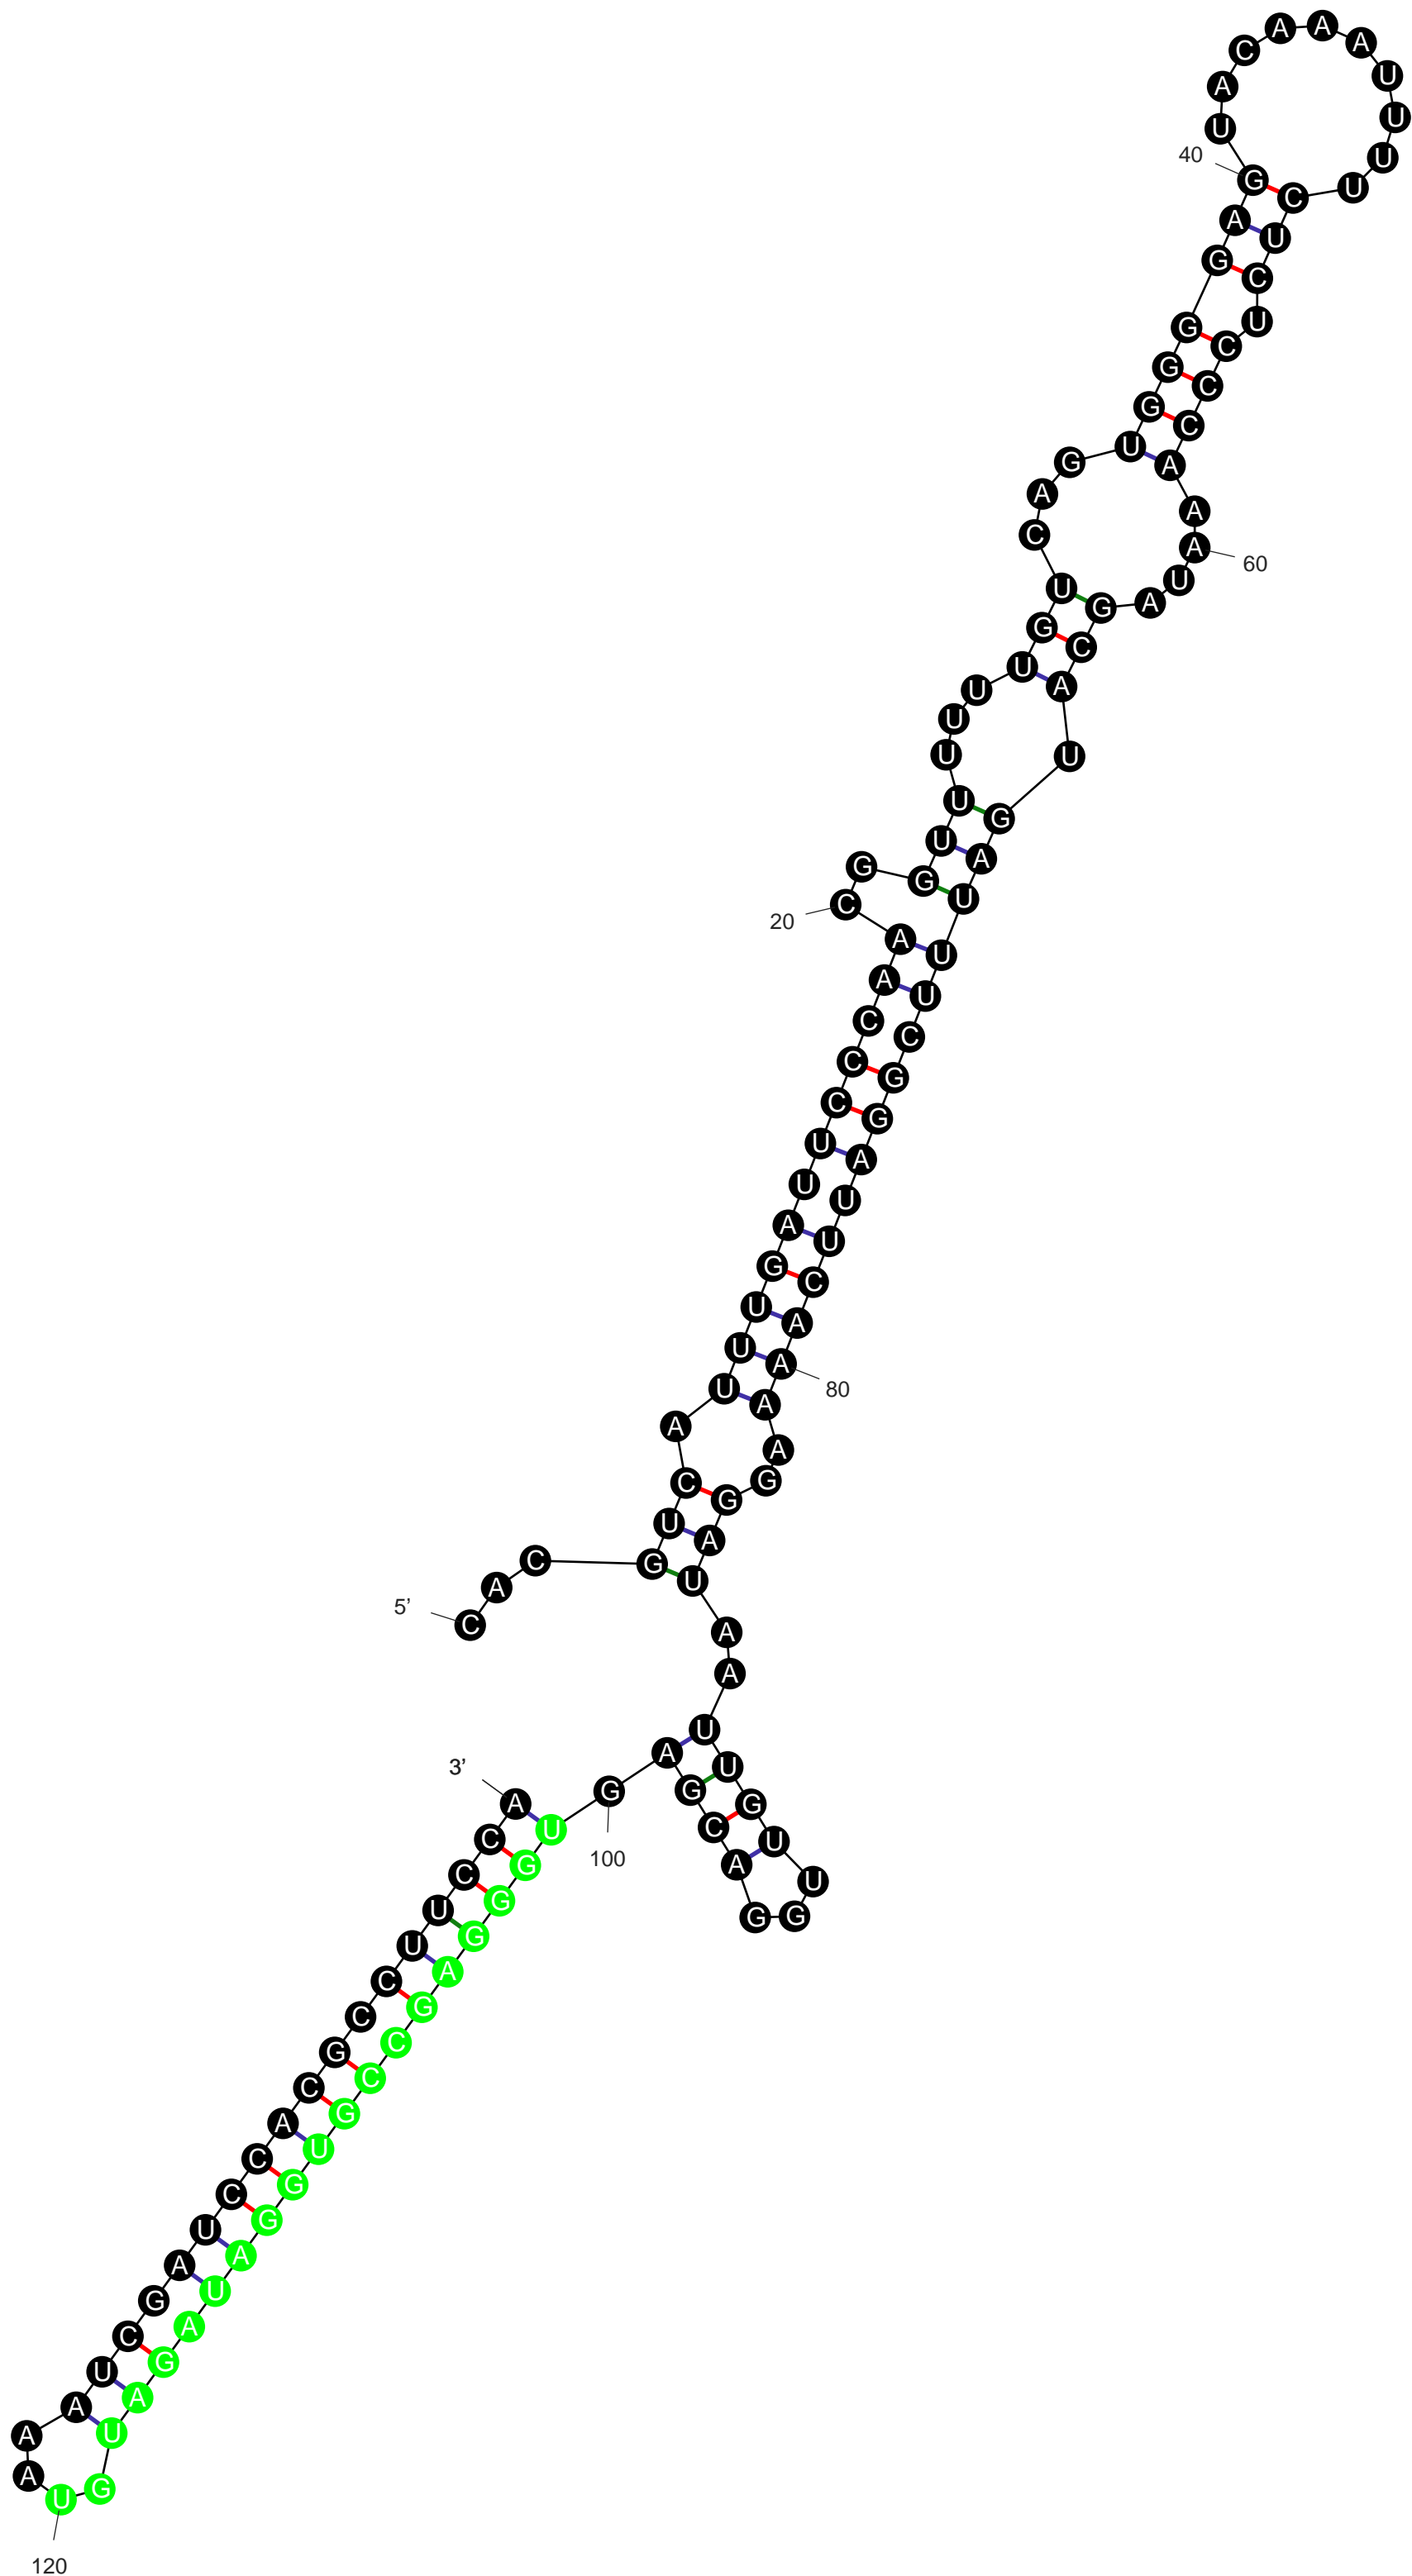

$dG = -40.60$  nta-miRn1a







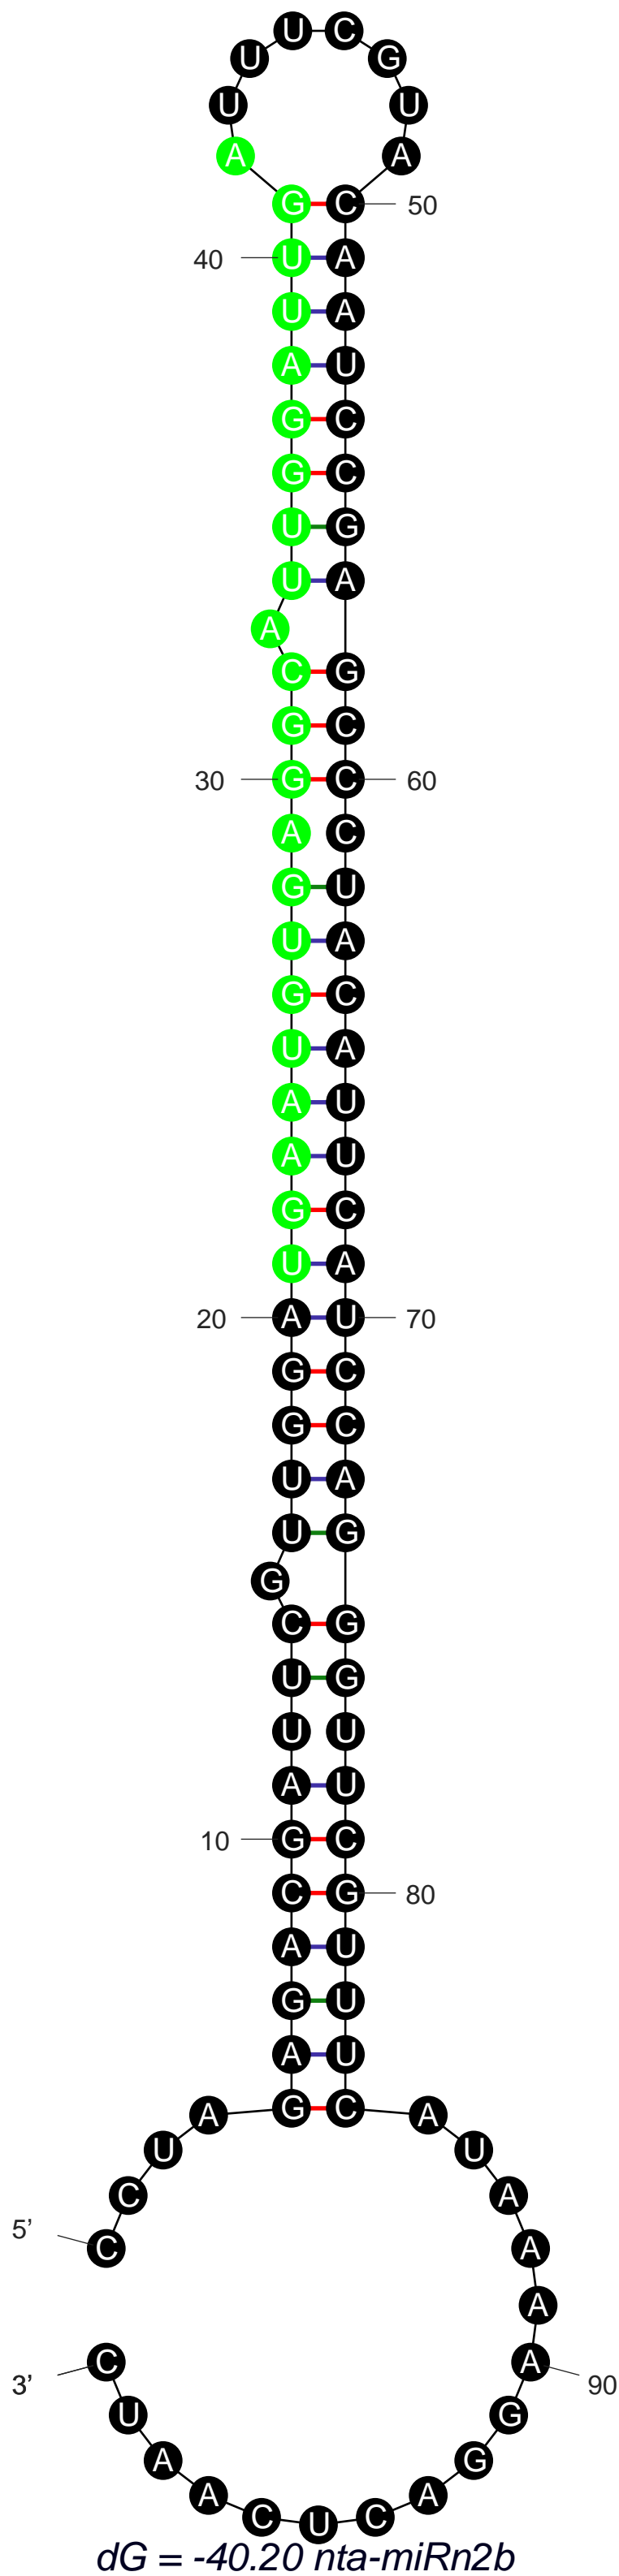



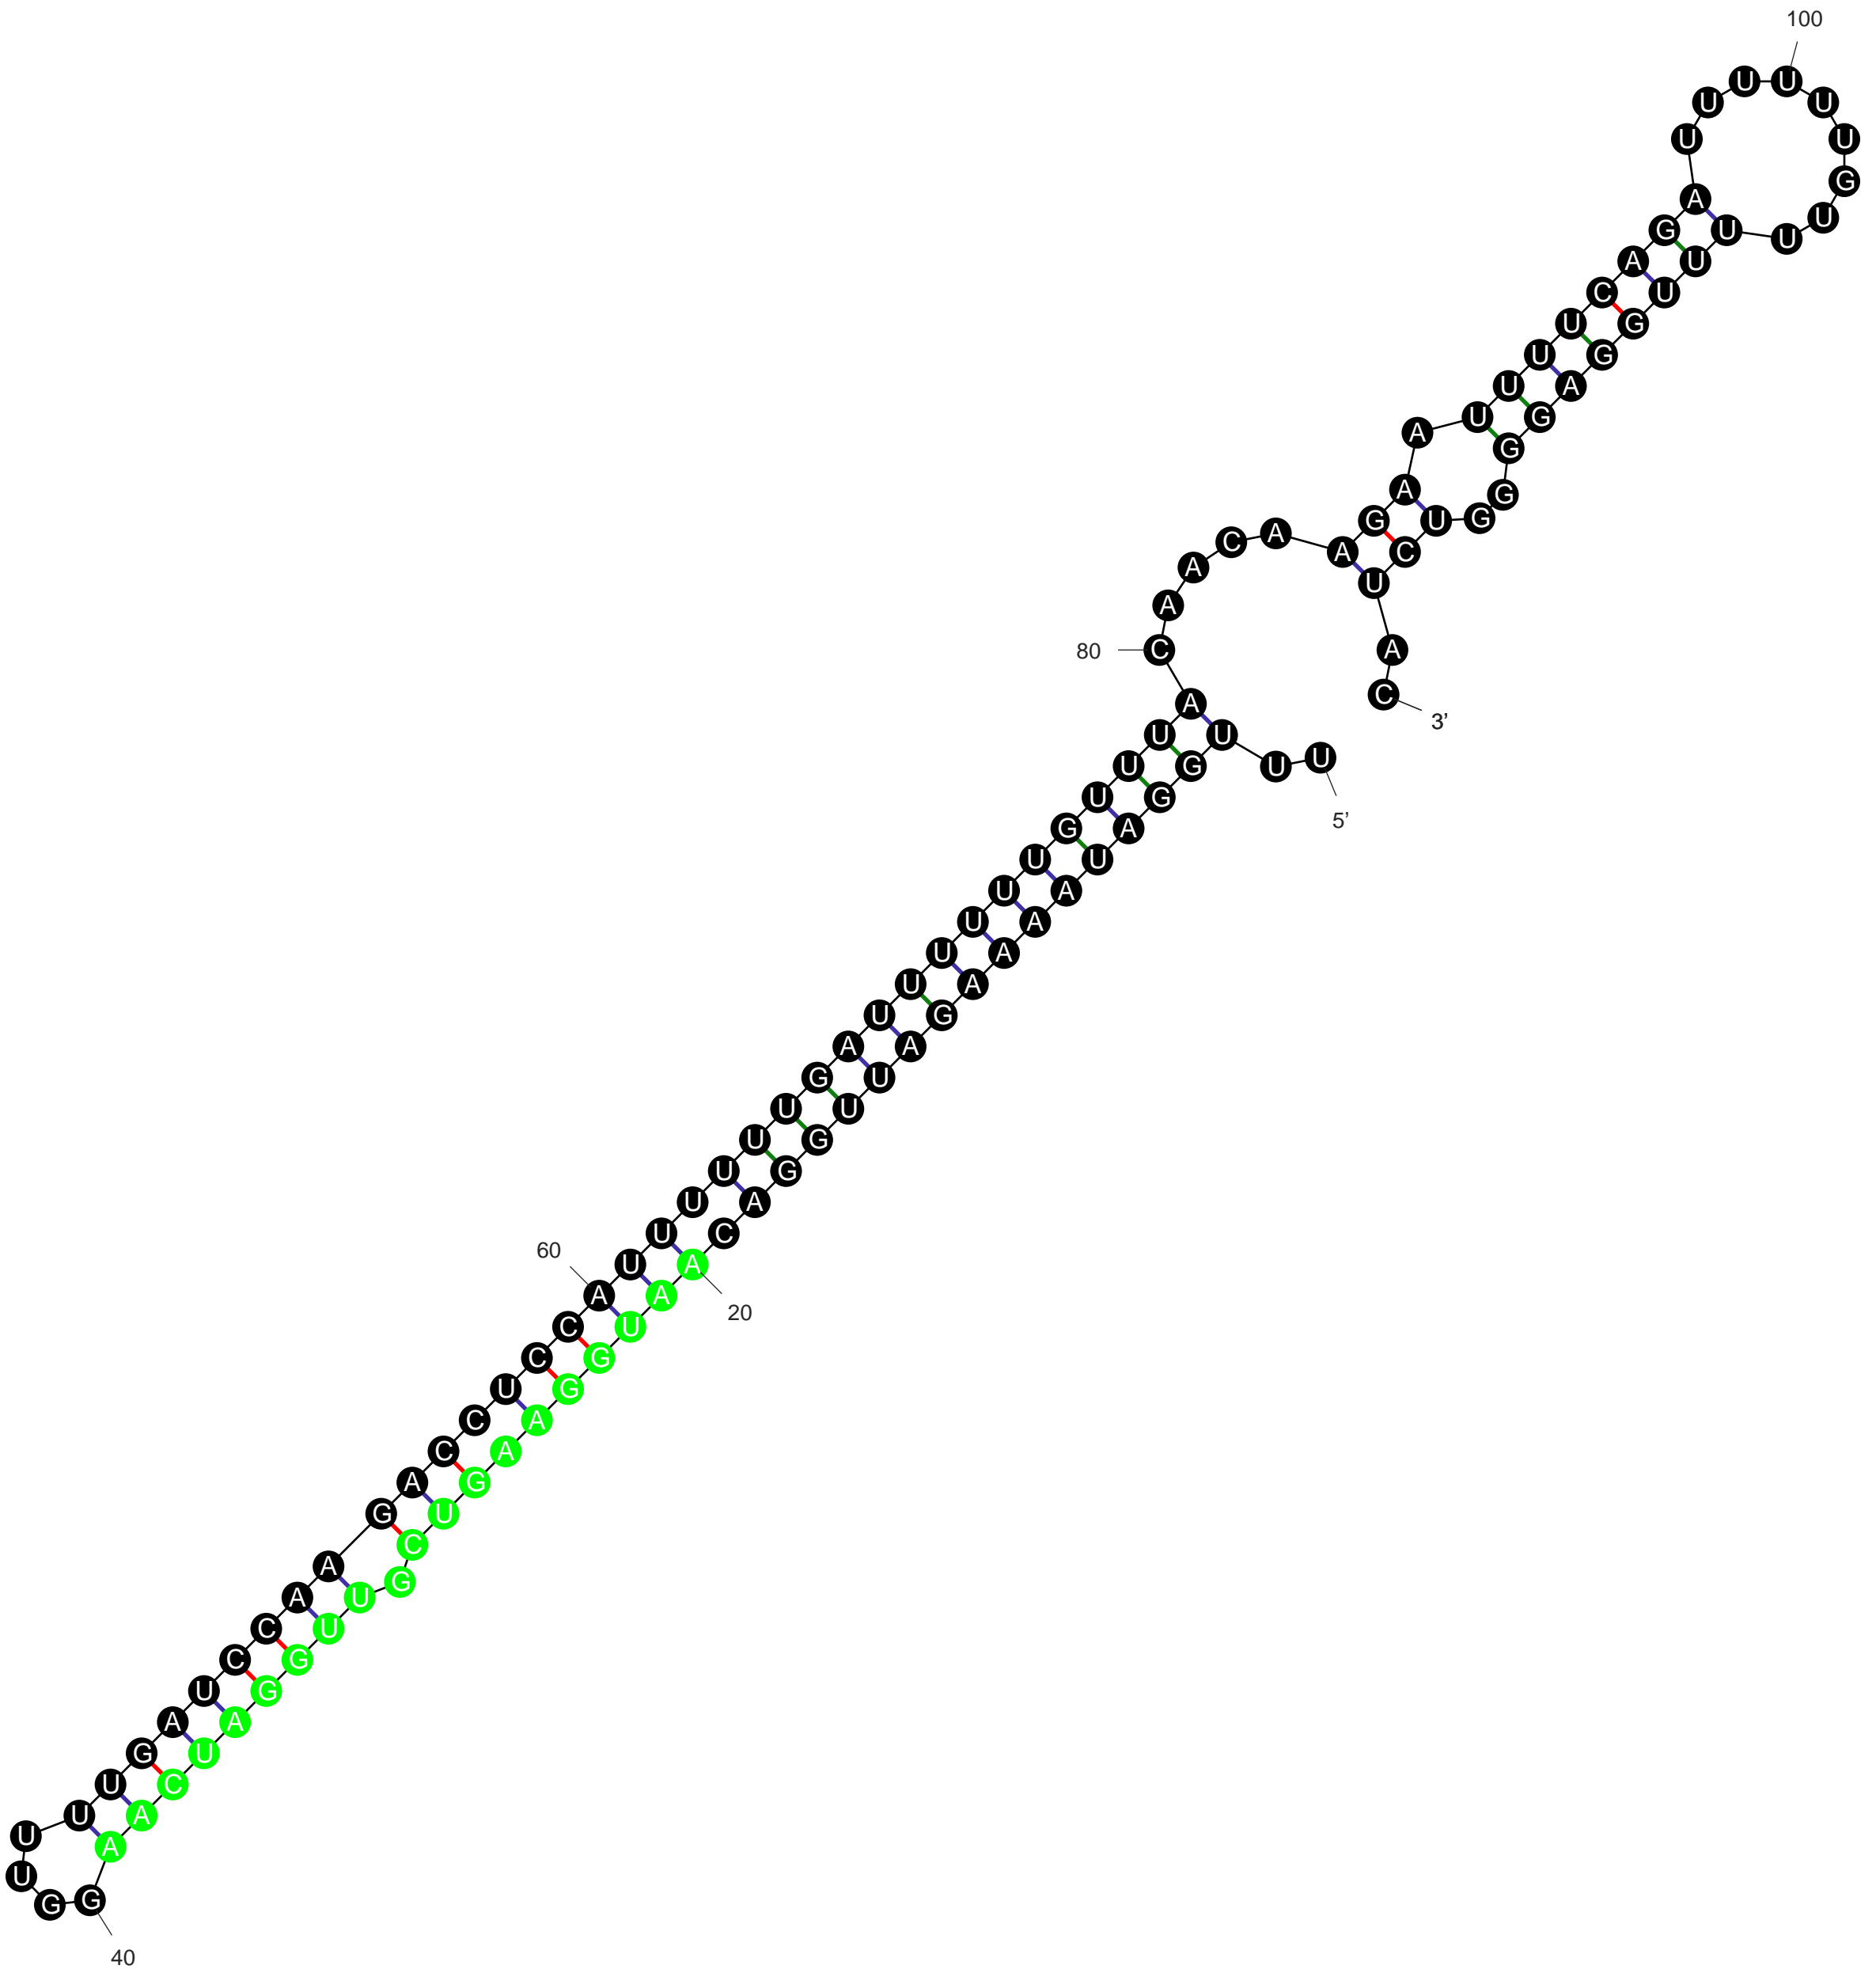

$dG = -39.00$  nta-miRn3

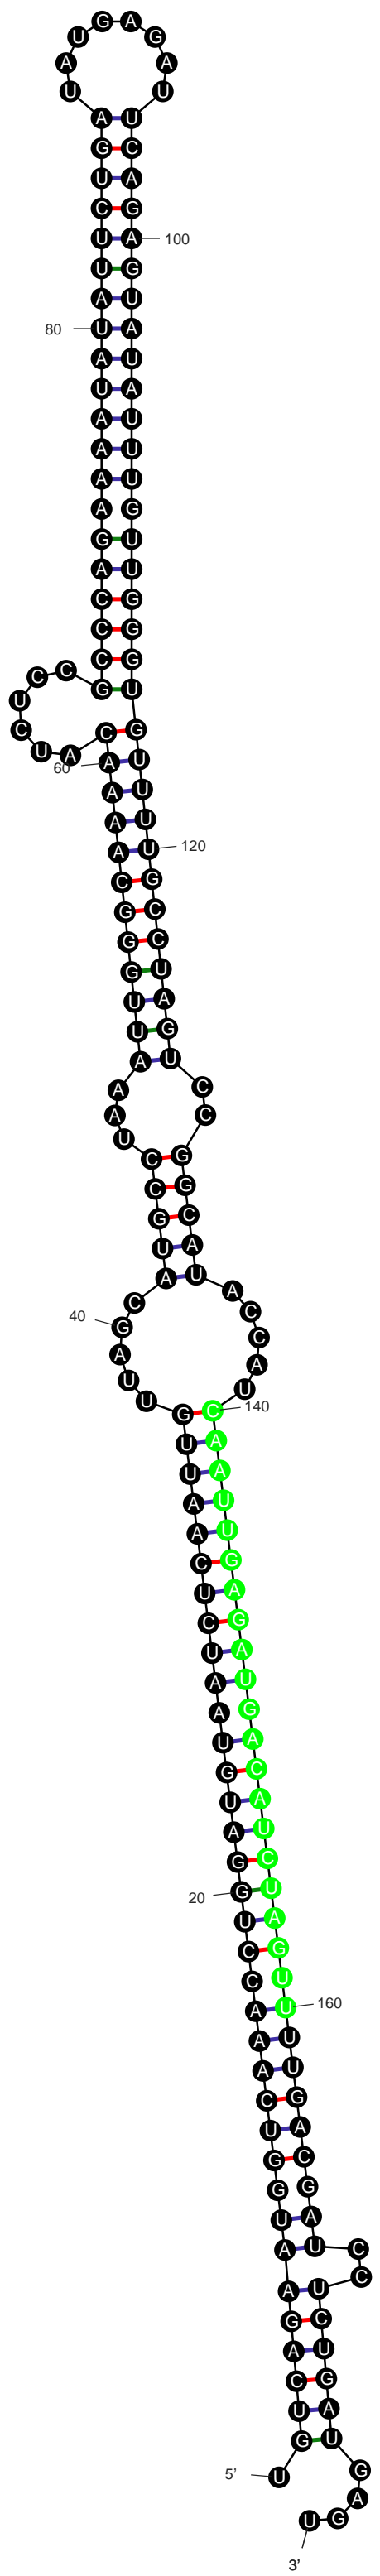

$dG = -74.60$  nta-miRn4



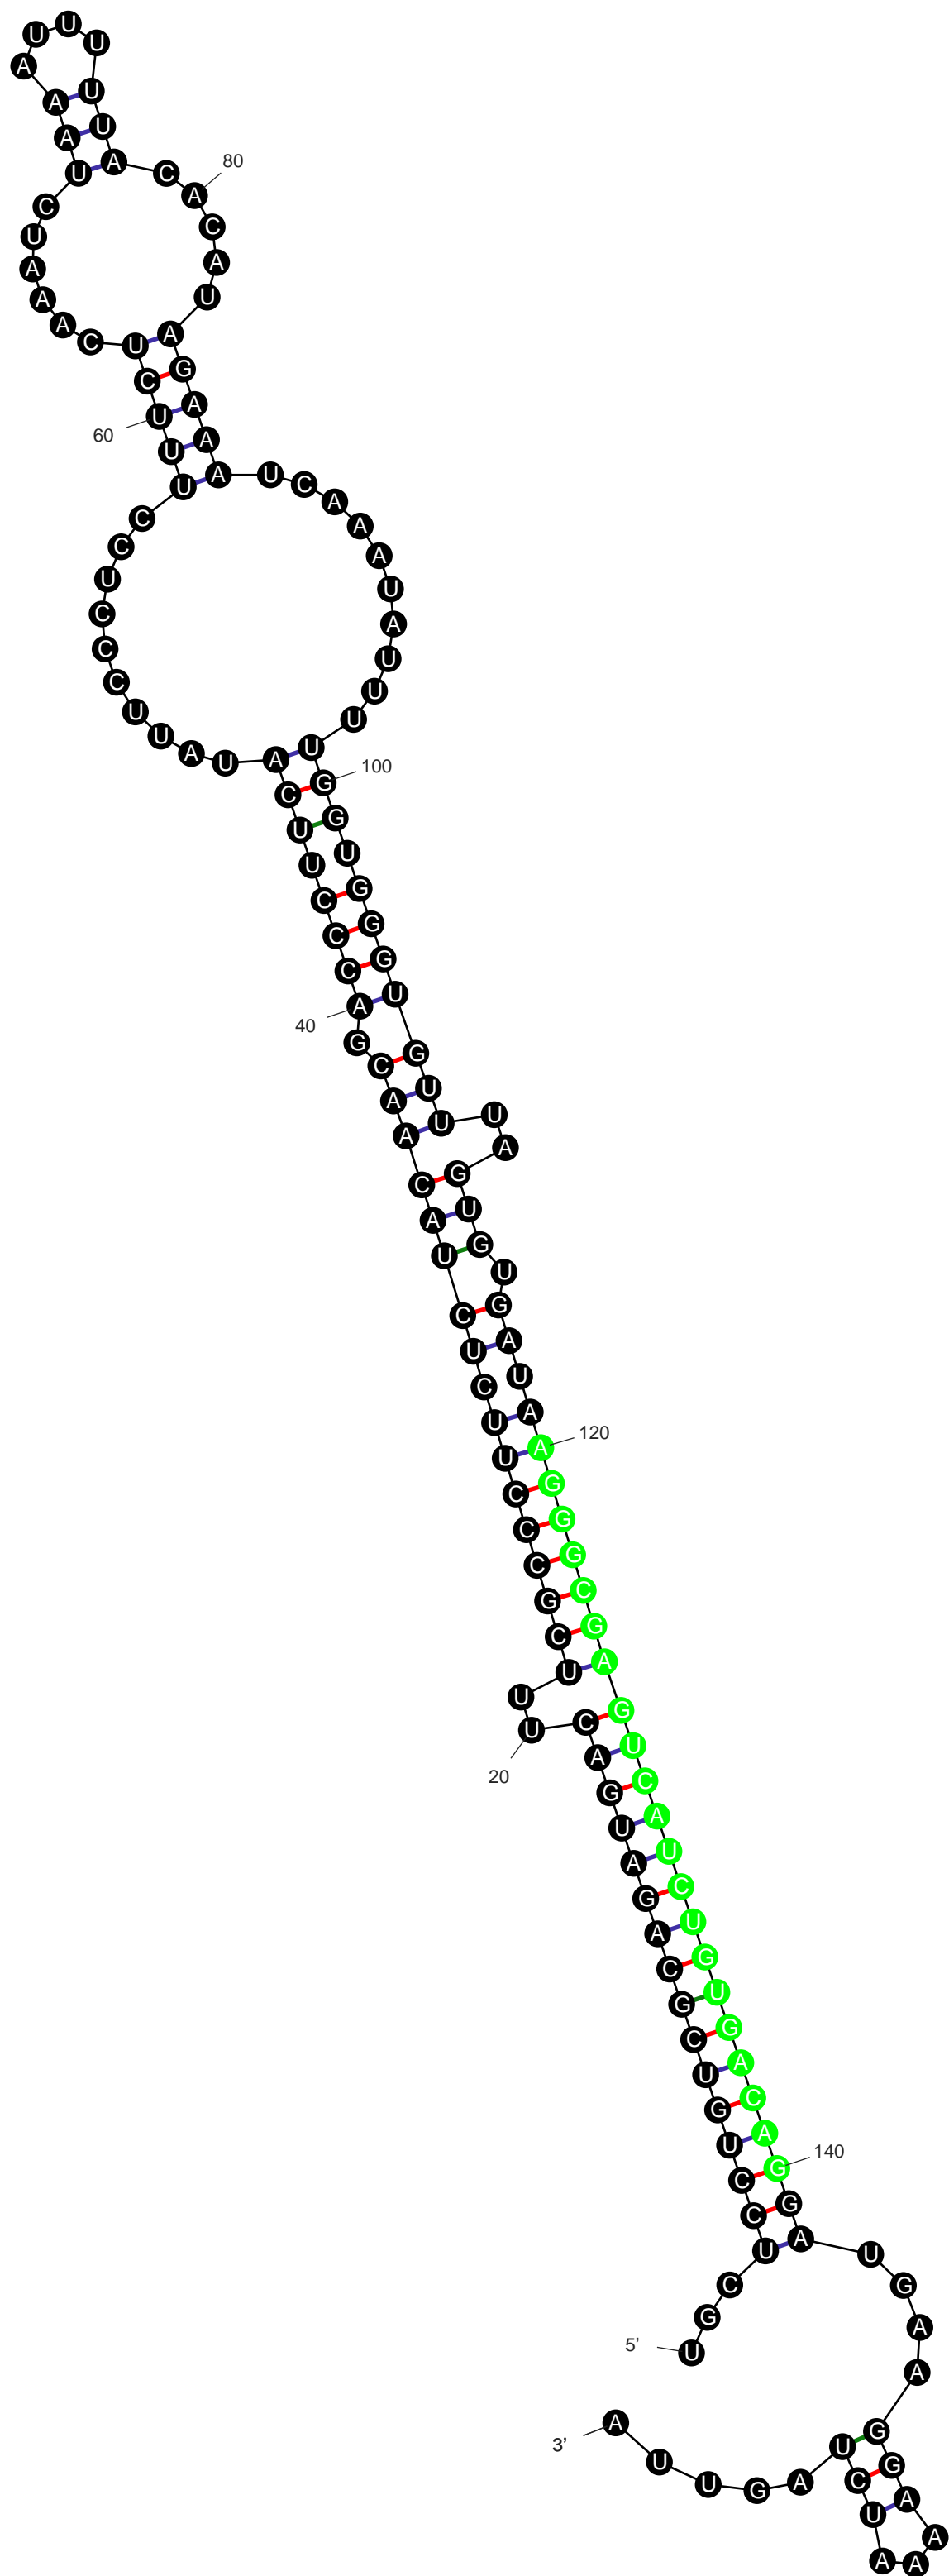

$dG = -52.20$  nta-miRn5a

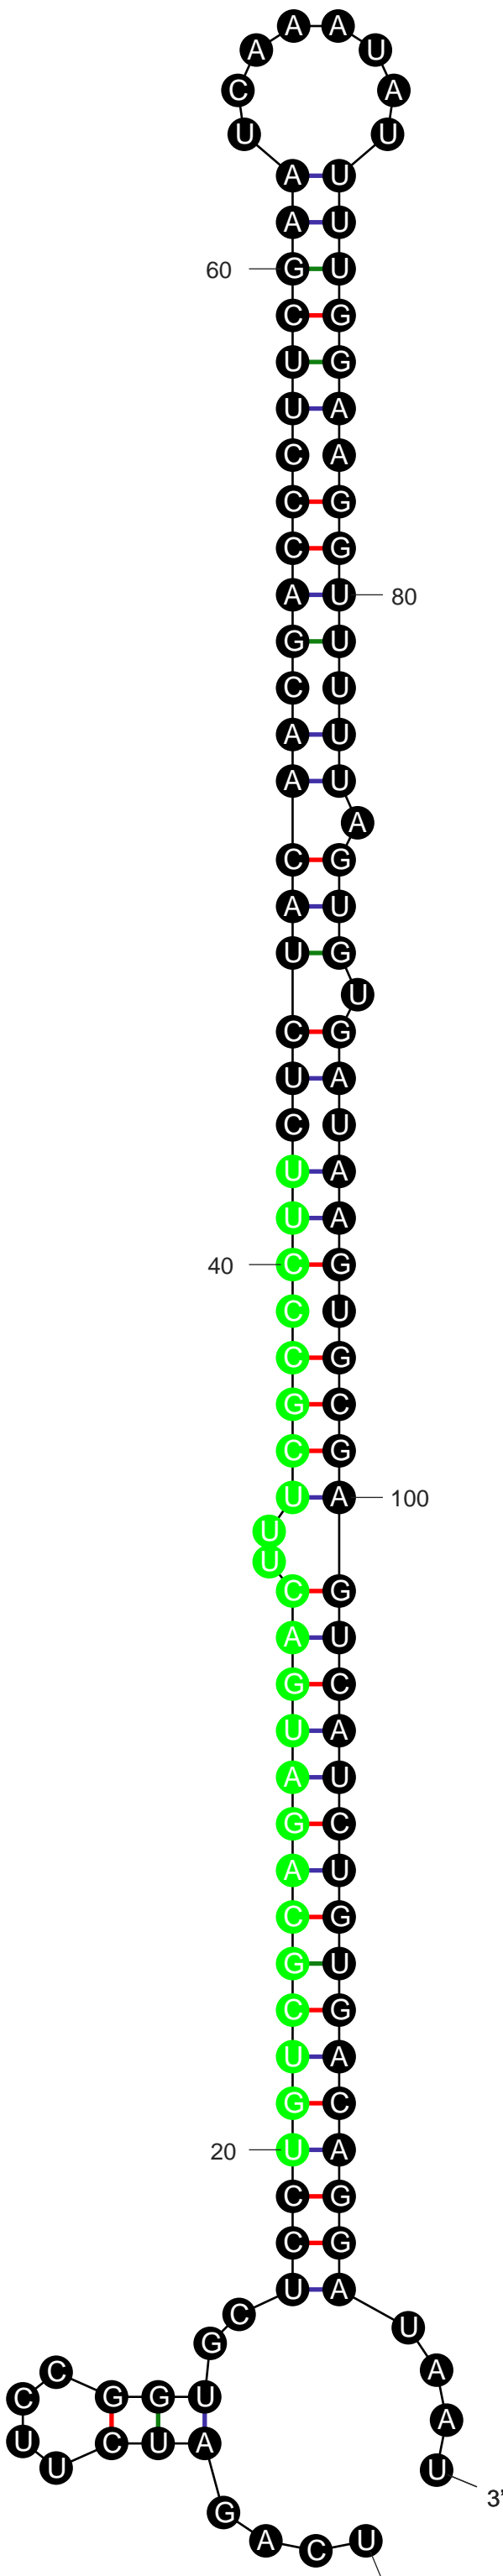

$dG = -43.60$  nta-miRn5b

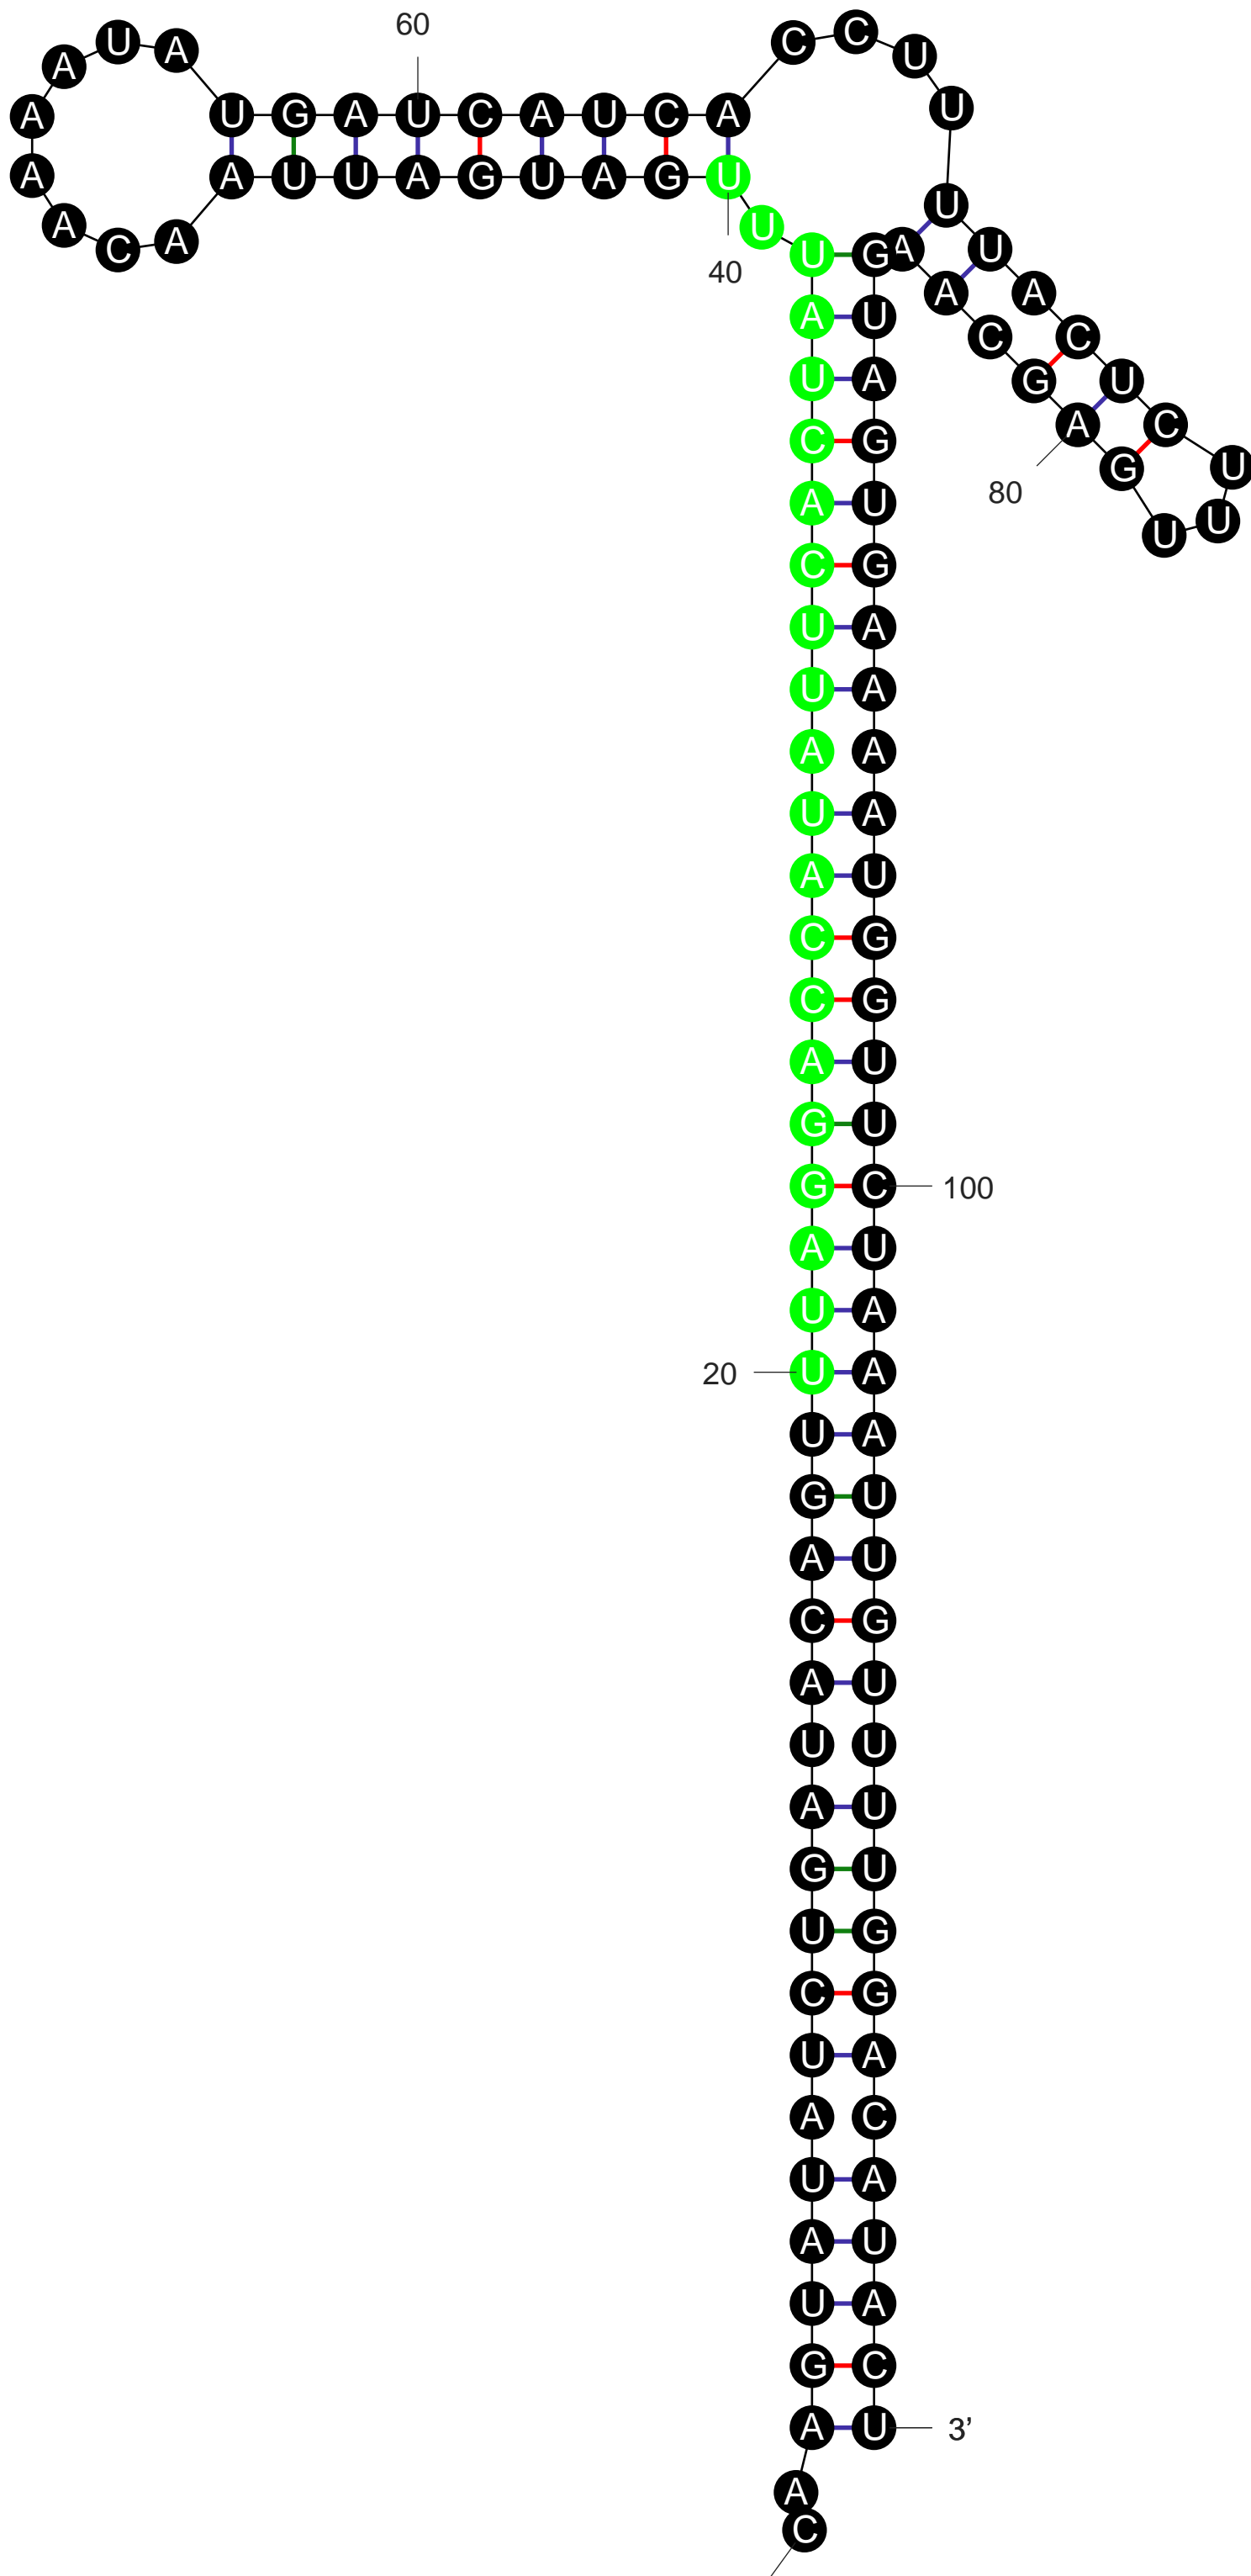

$dG = -42.40$  nta-miRn6



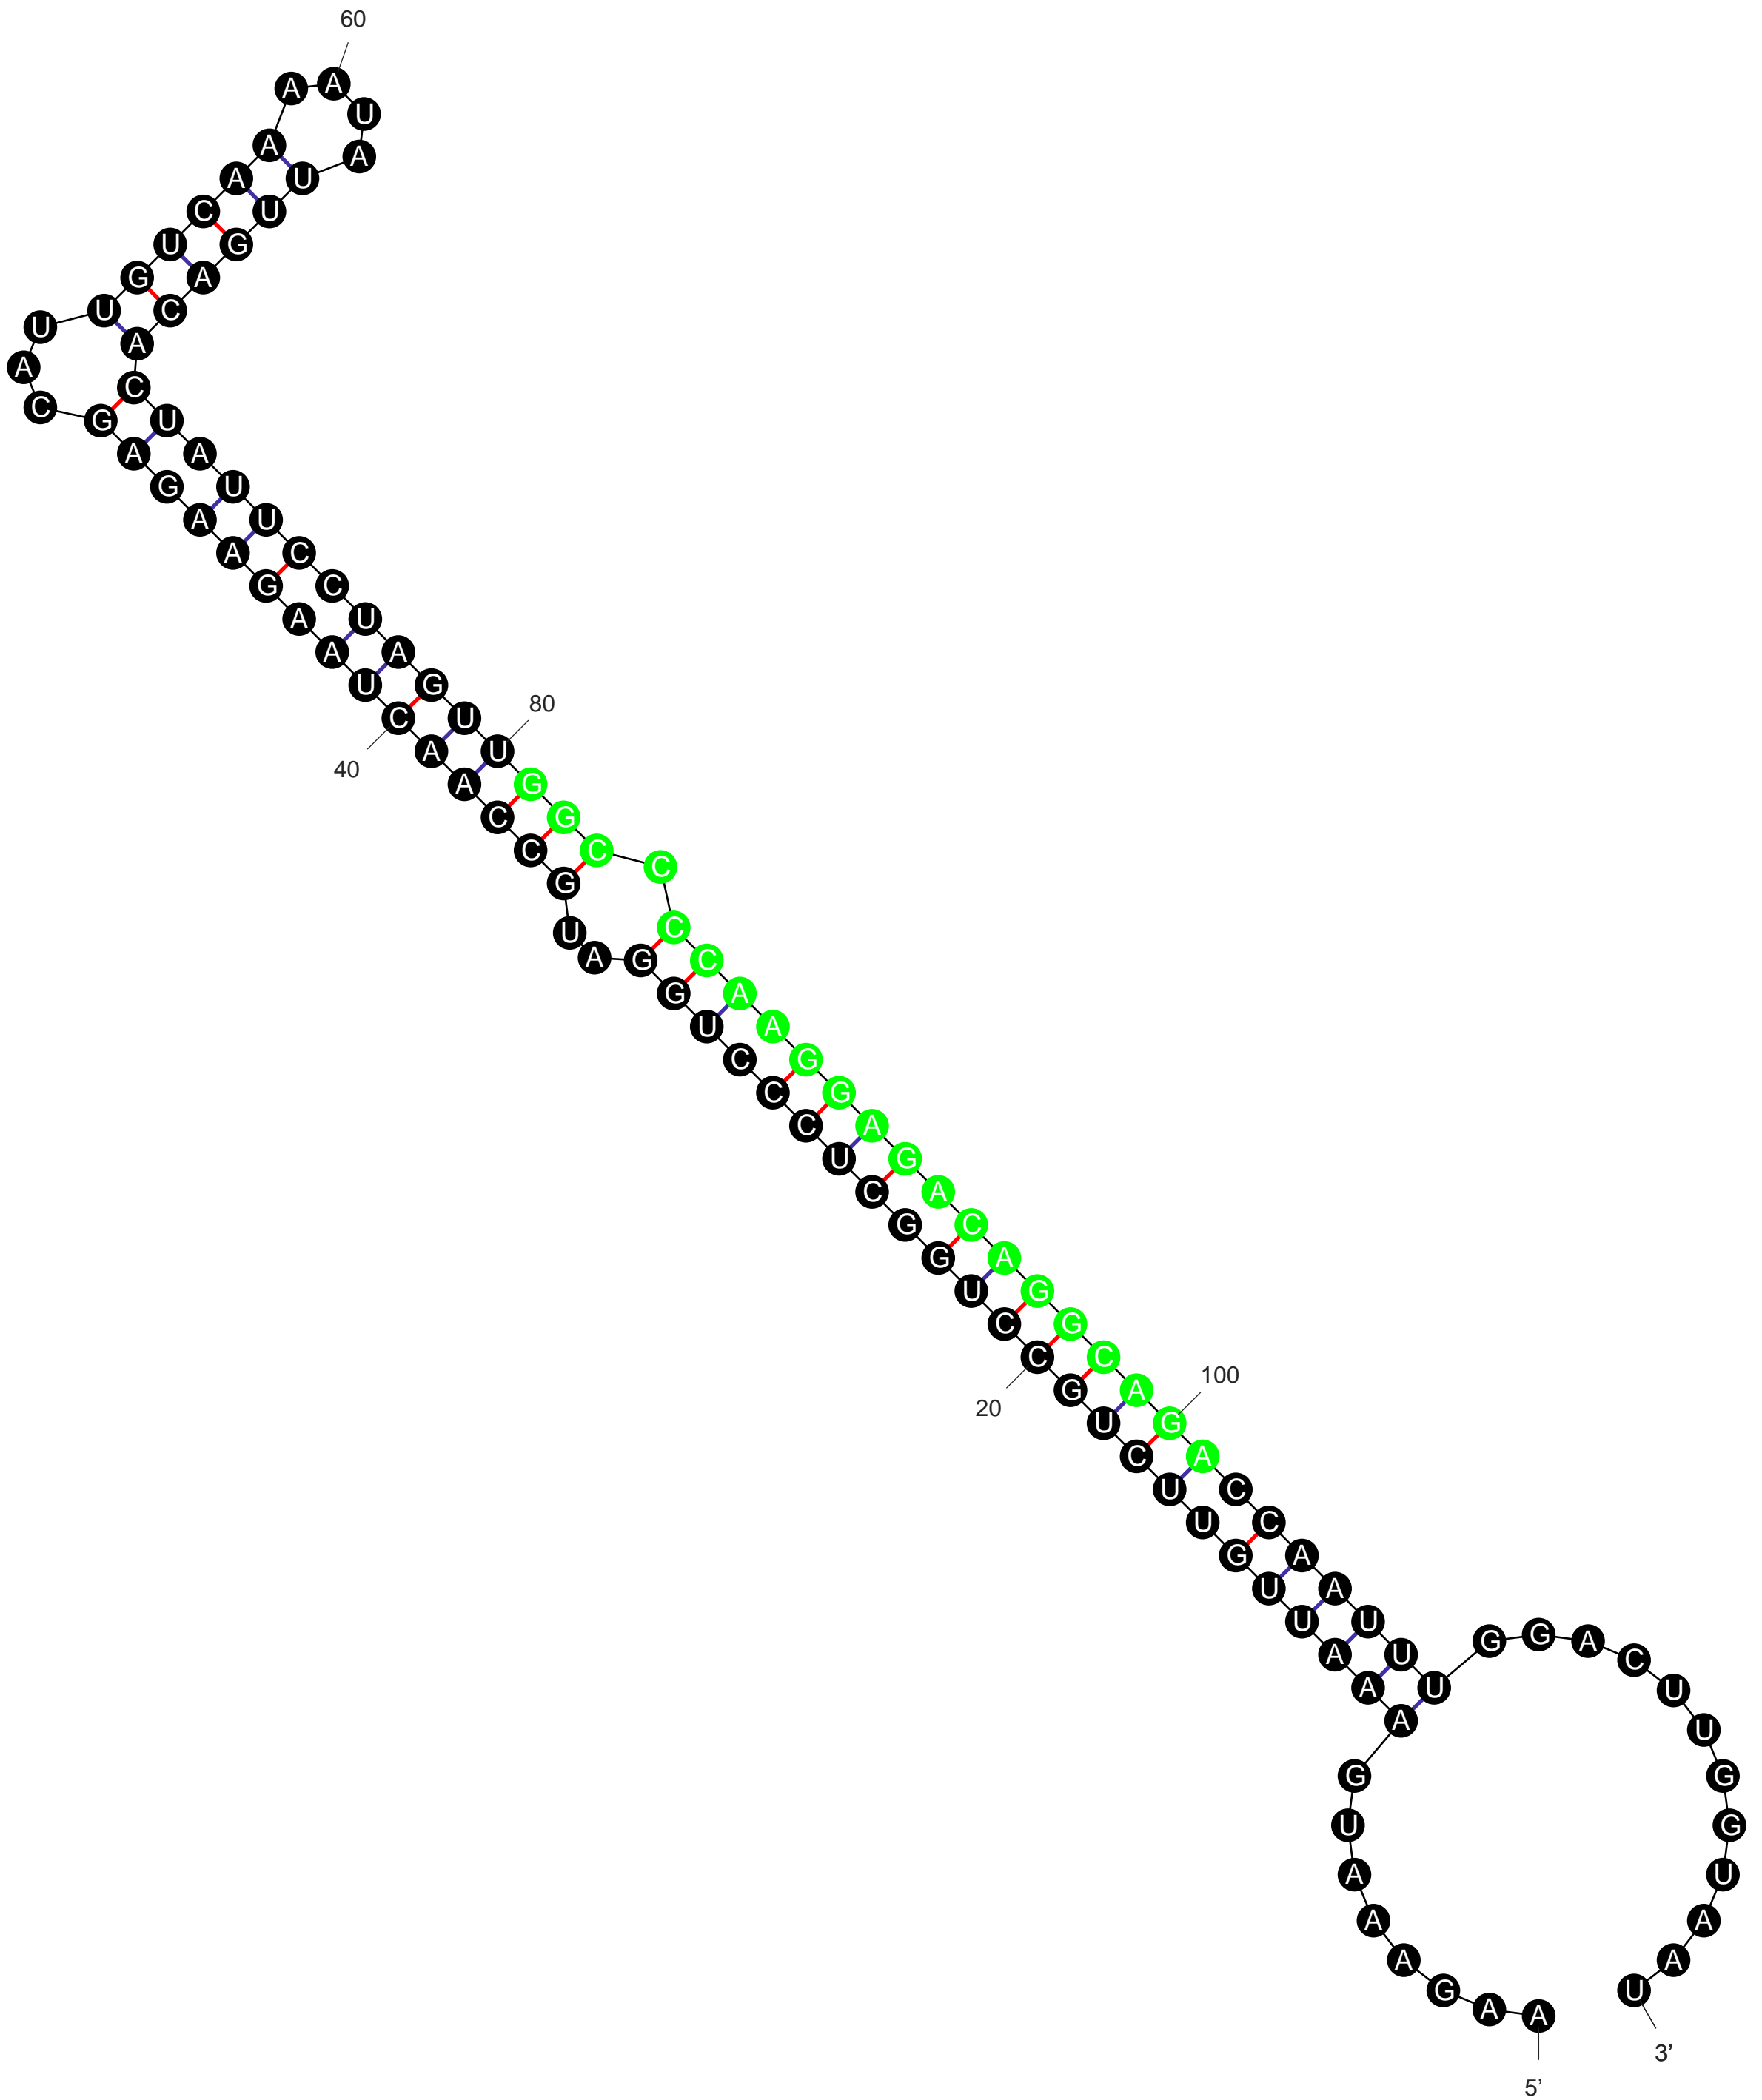

$dG = -47.40$  nta-miRn8

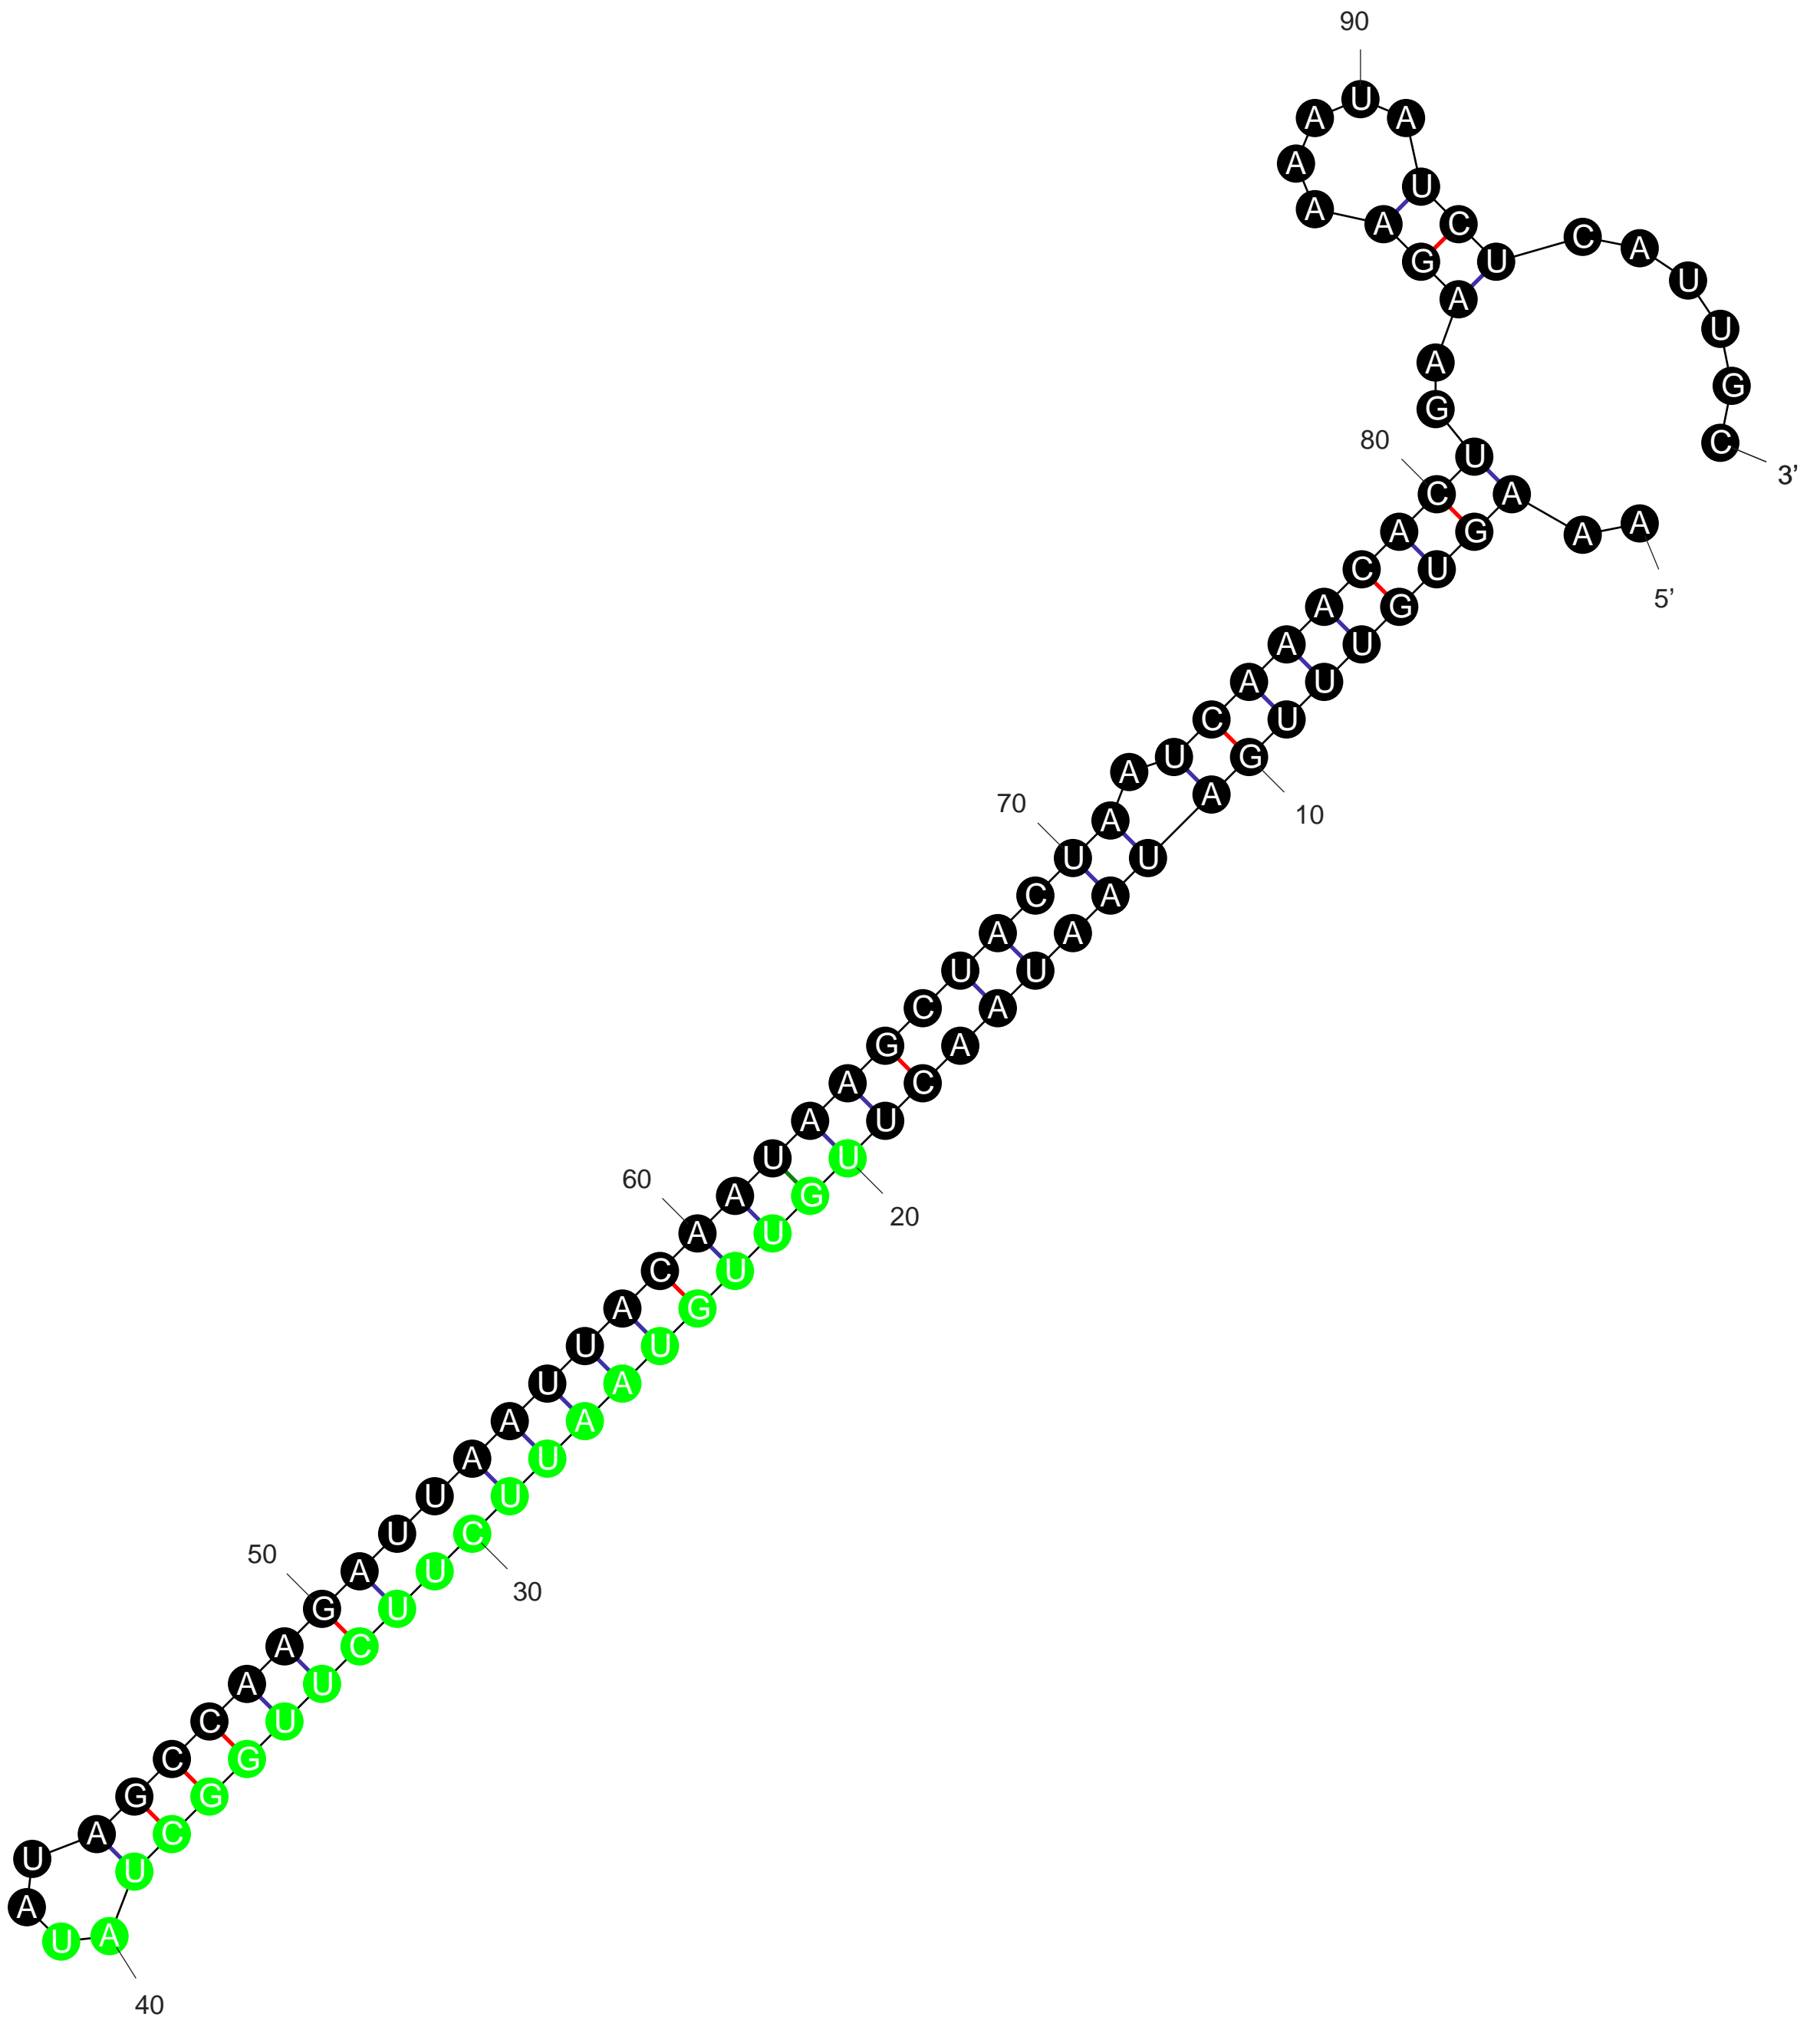

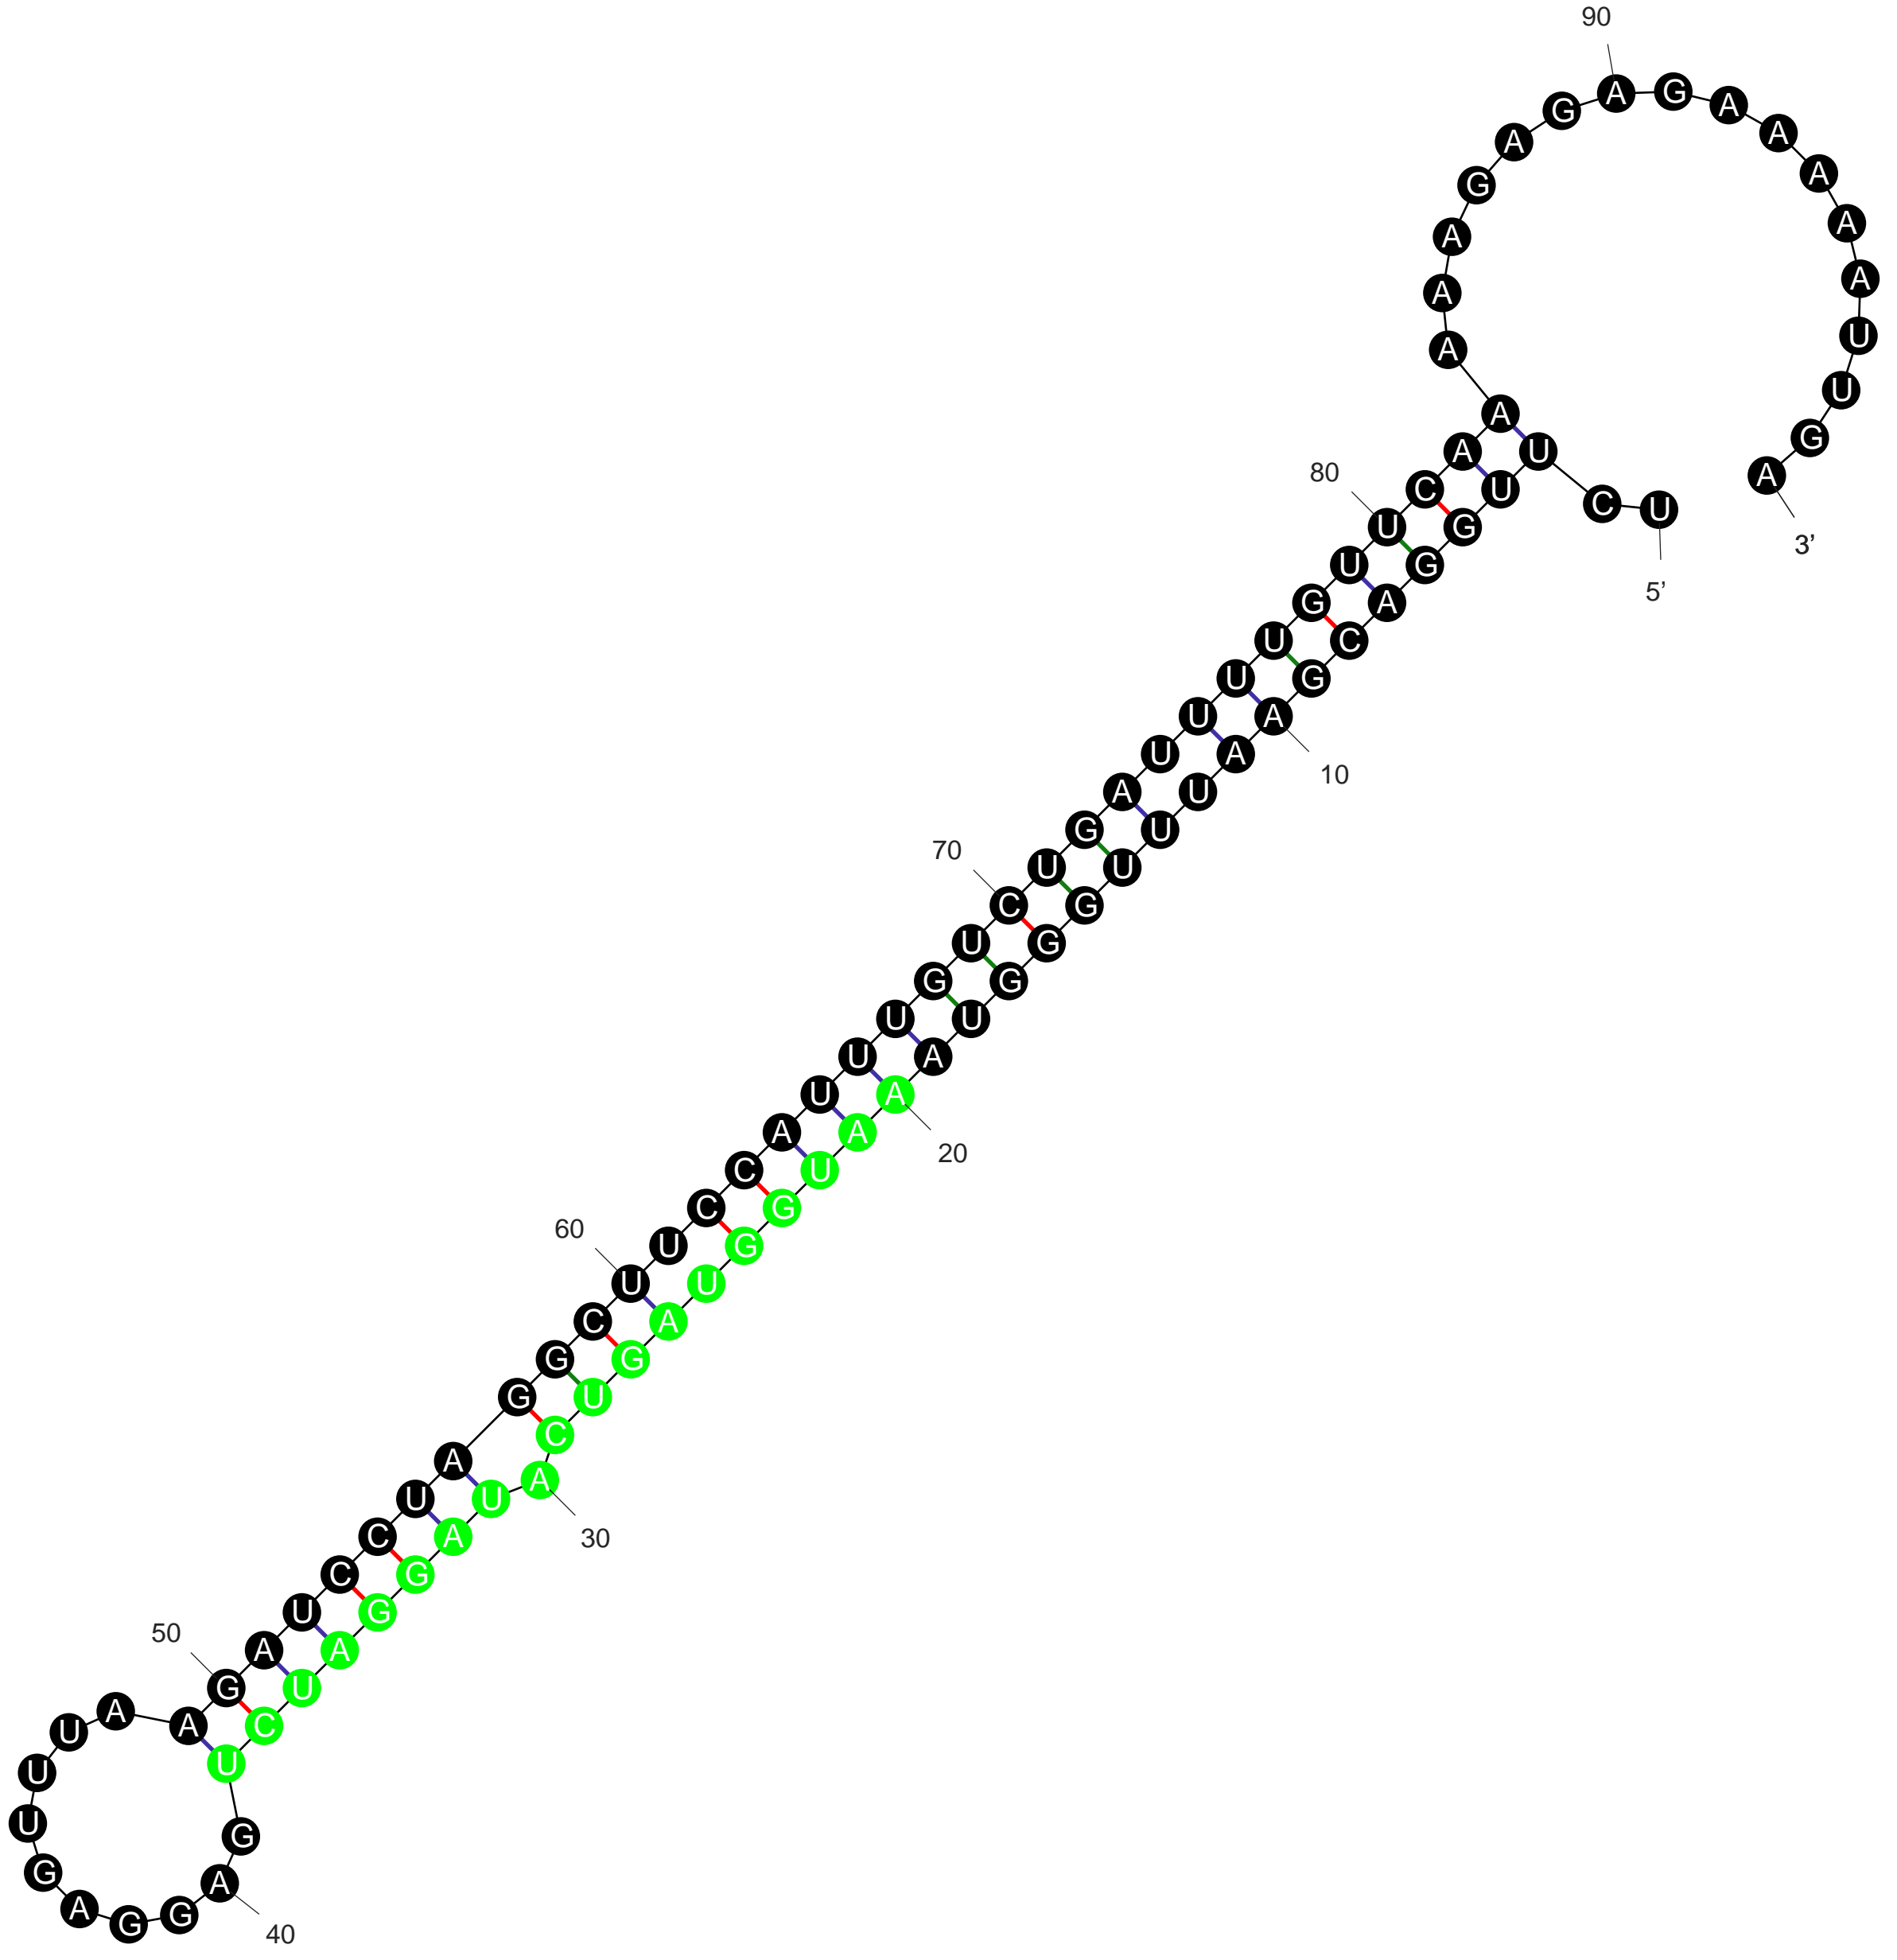

$dG = -33.50$  nta-miRn10

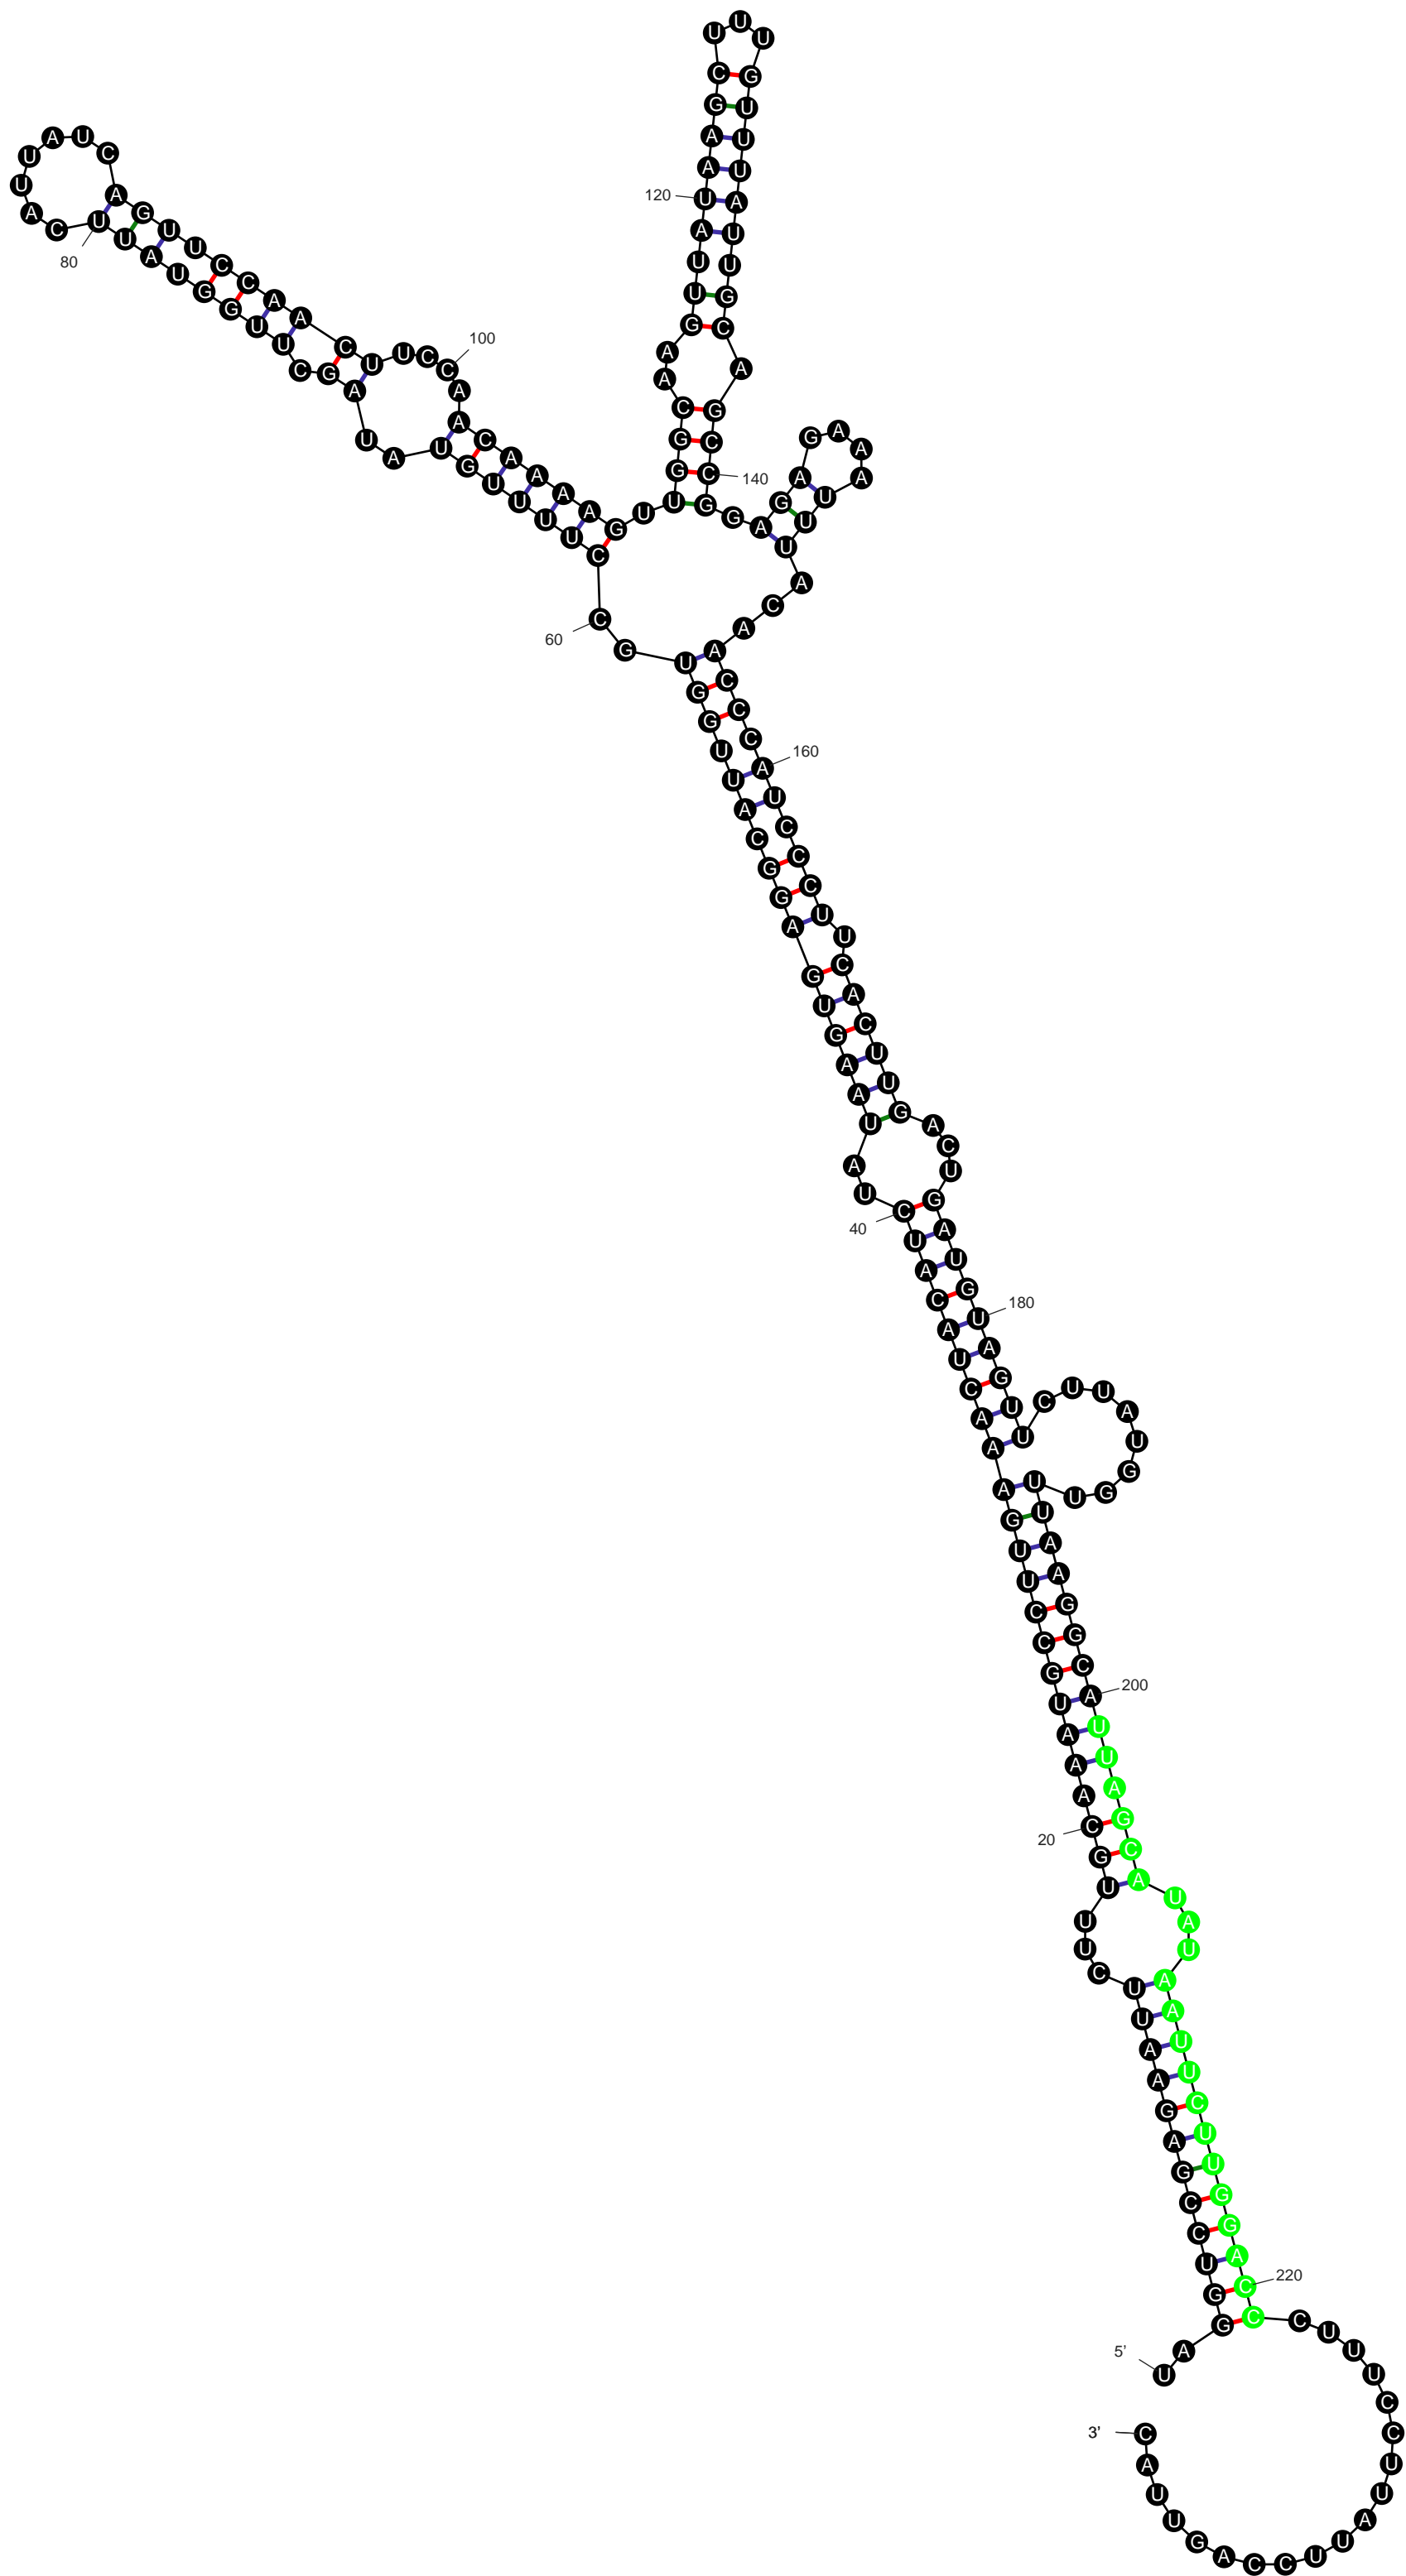

$dG = -67.30$  nta-miRn11a





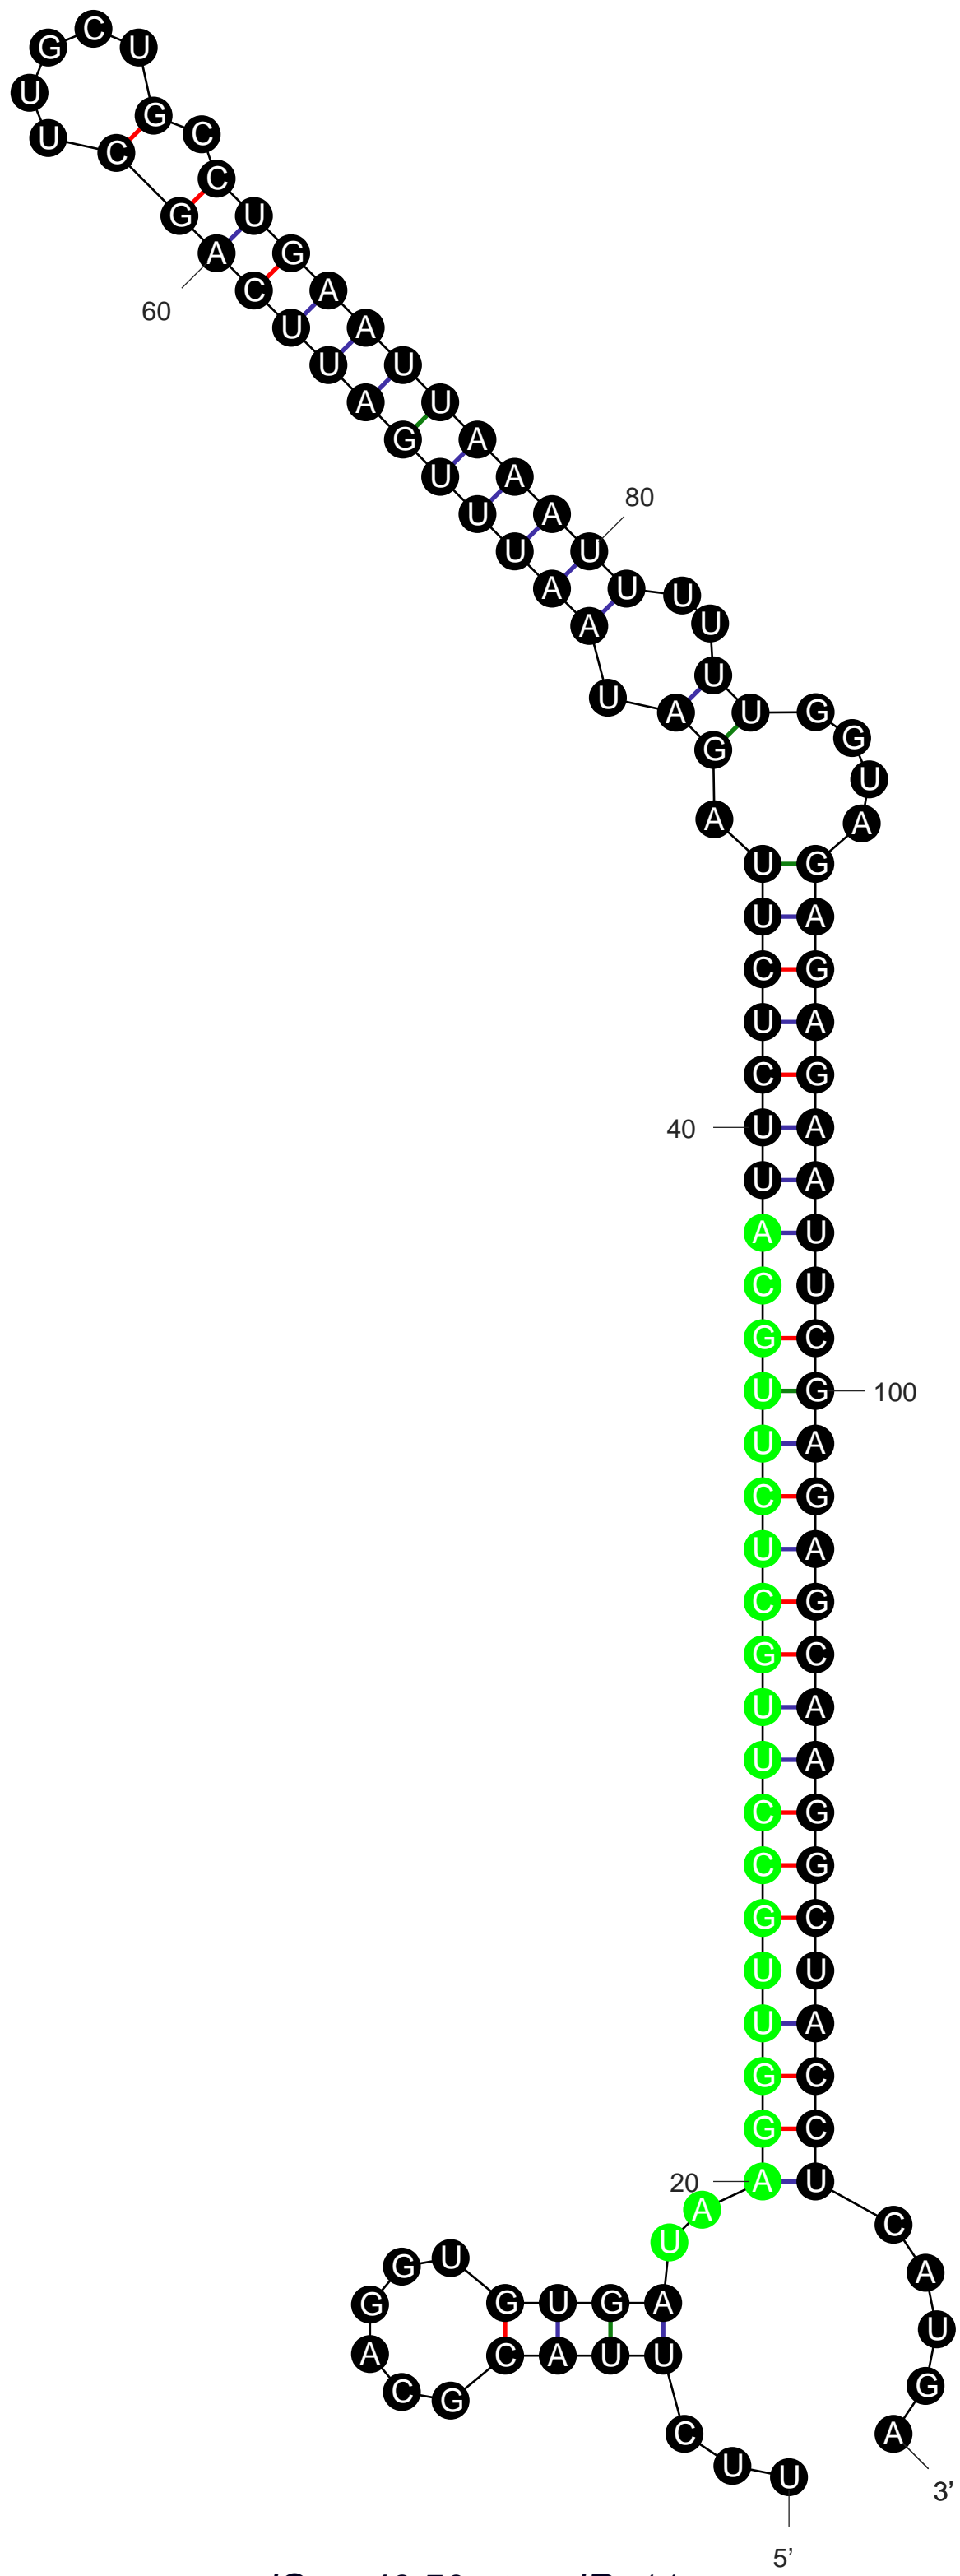

$dG = -46.50$  nta-miRn11c

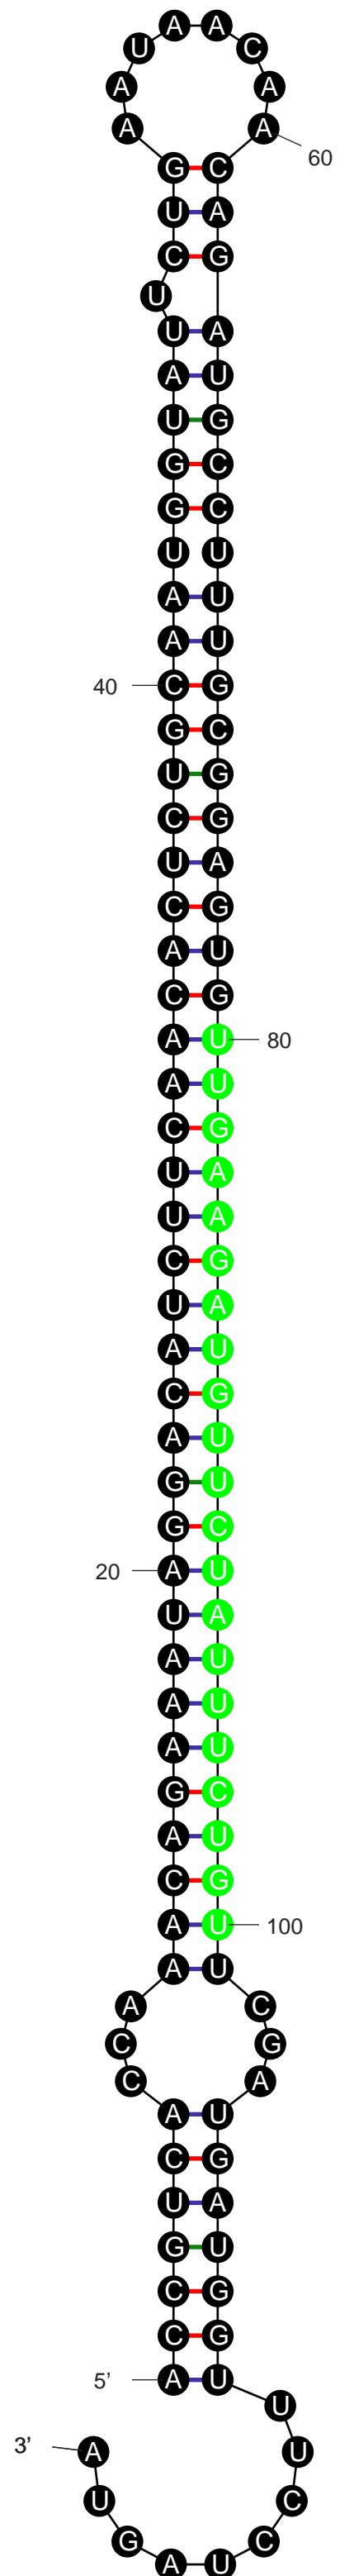

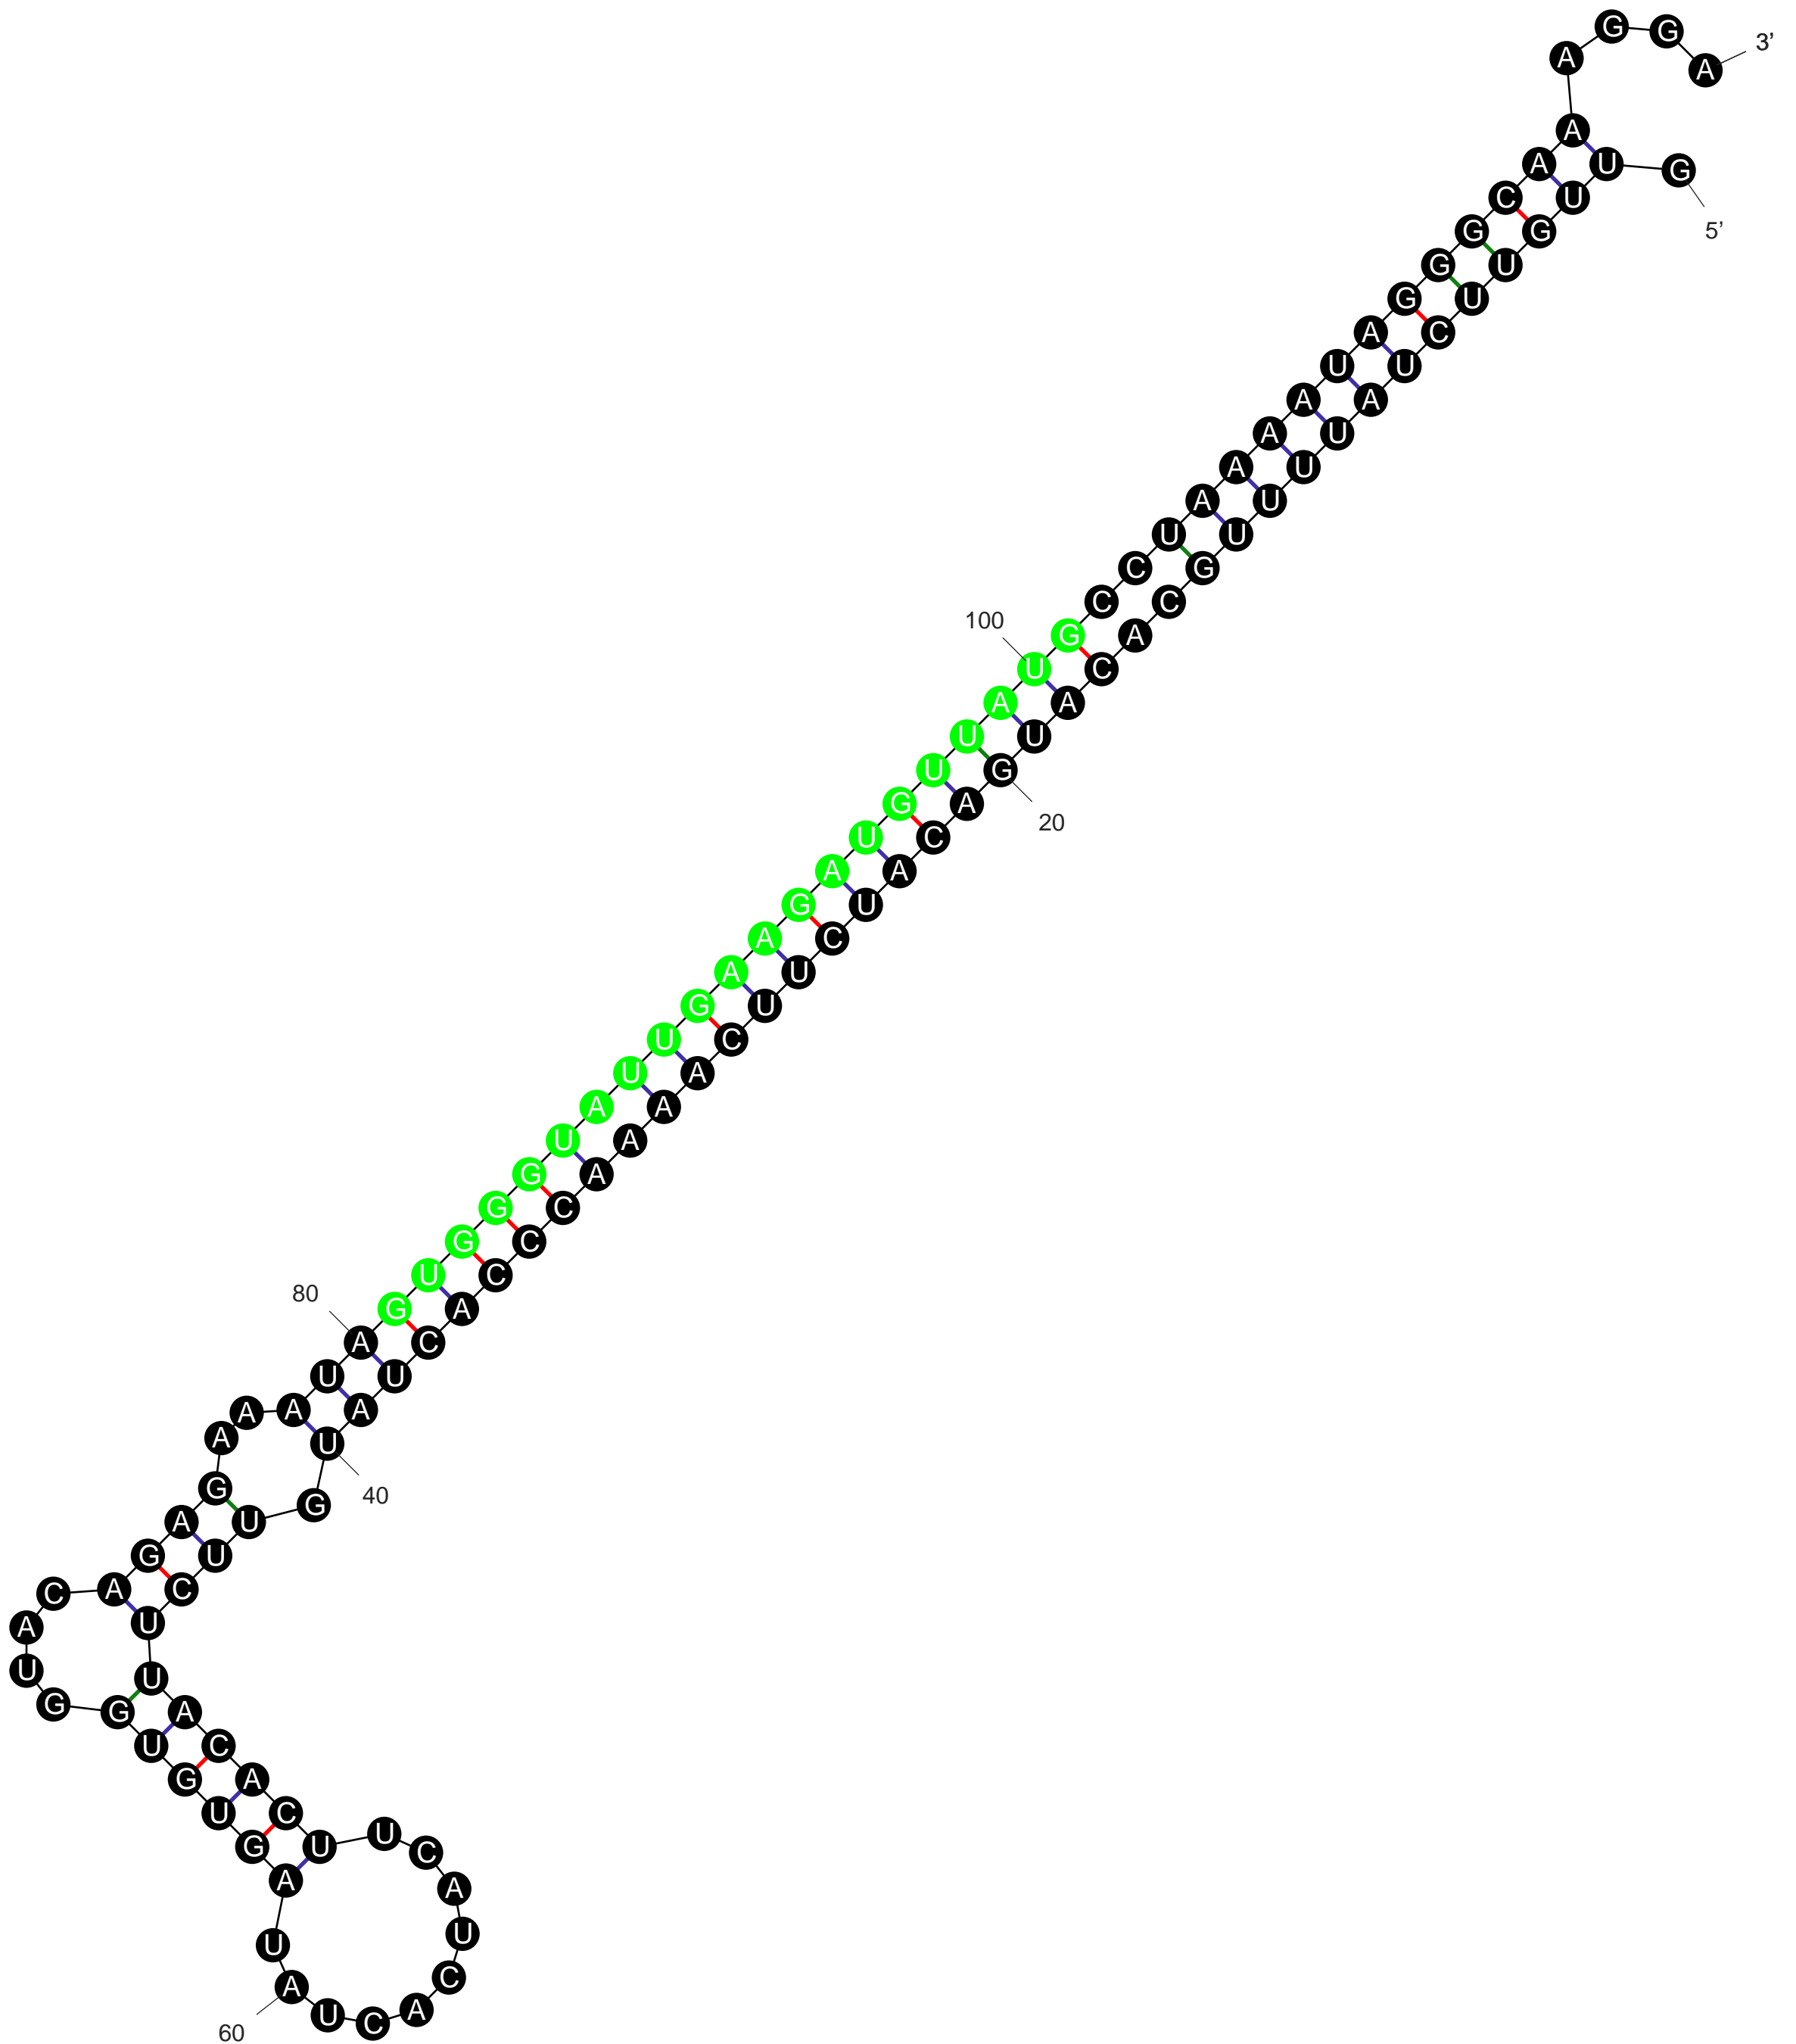

$dG = -50.40$  nta-miRn13a

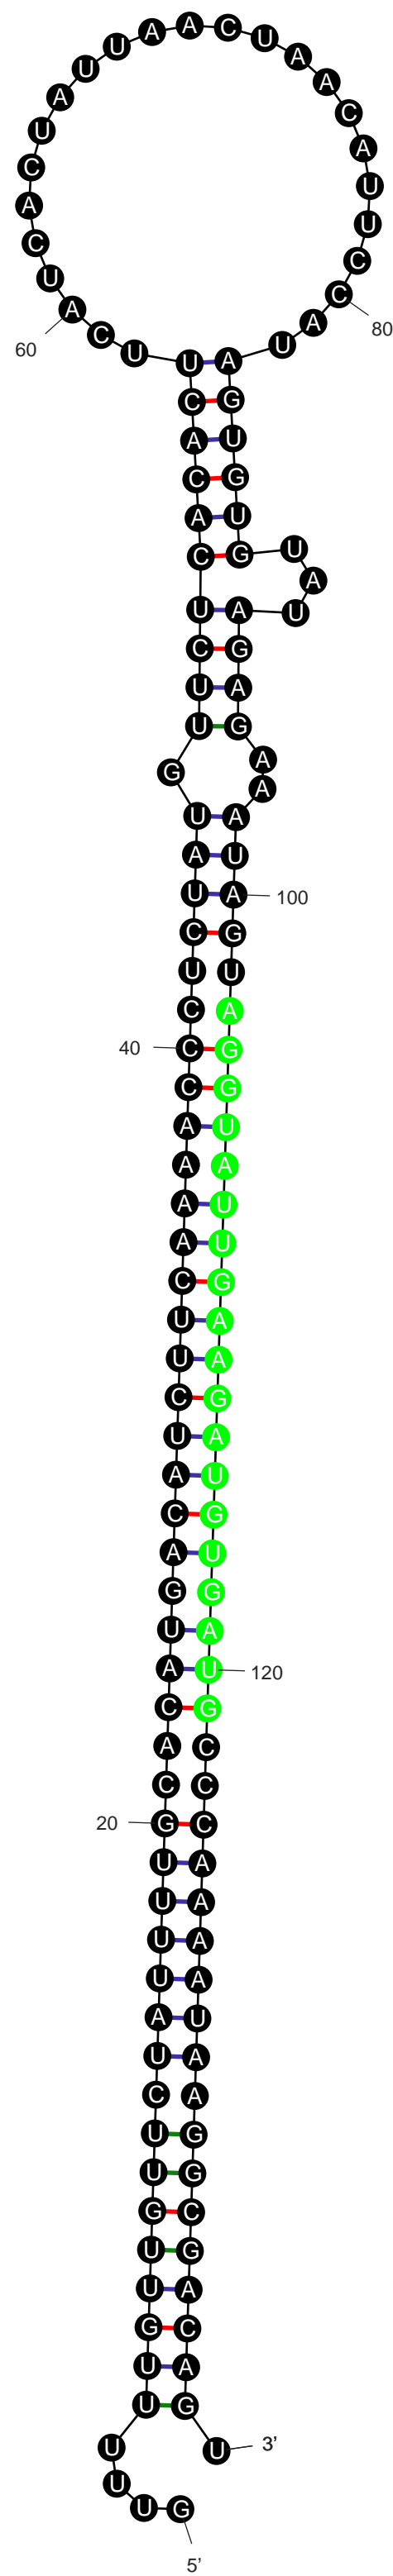

$dG = -41.60$  nta-miRn13b

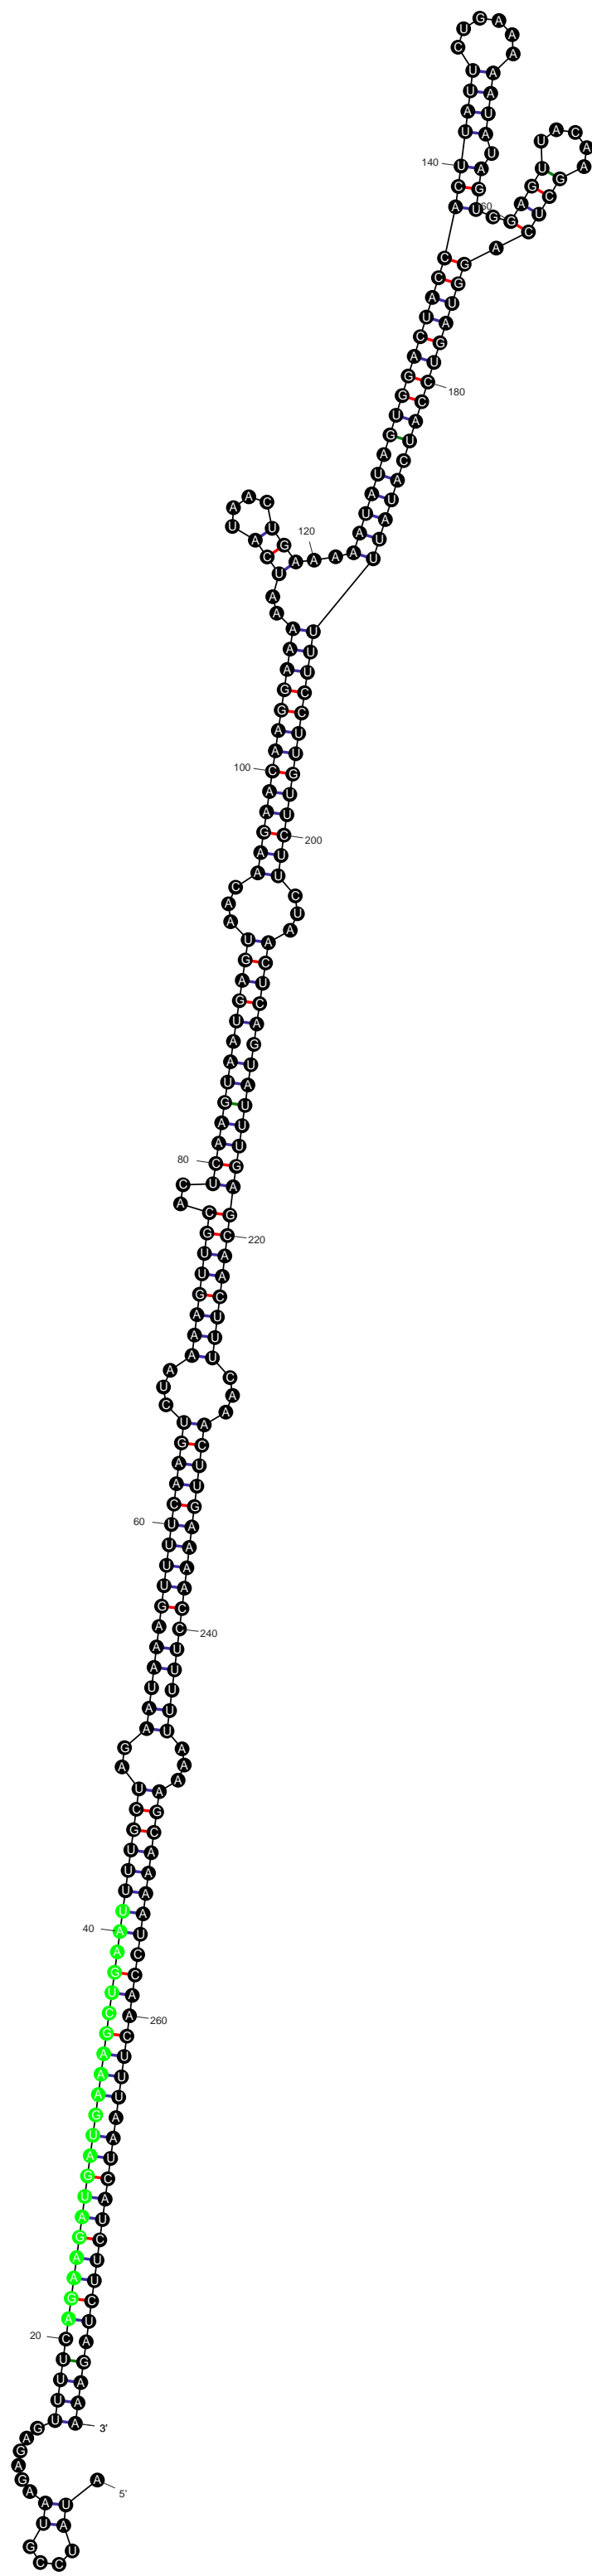

$dG = -92.80$  nta-miRn14













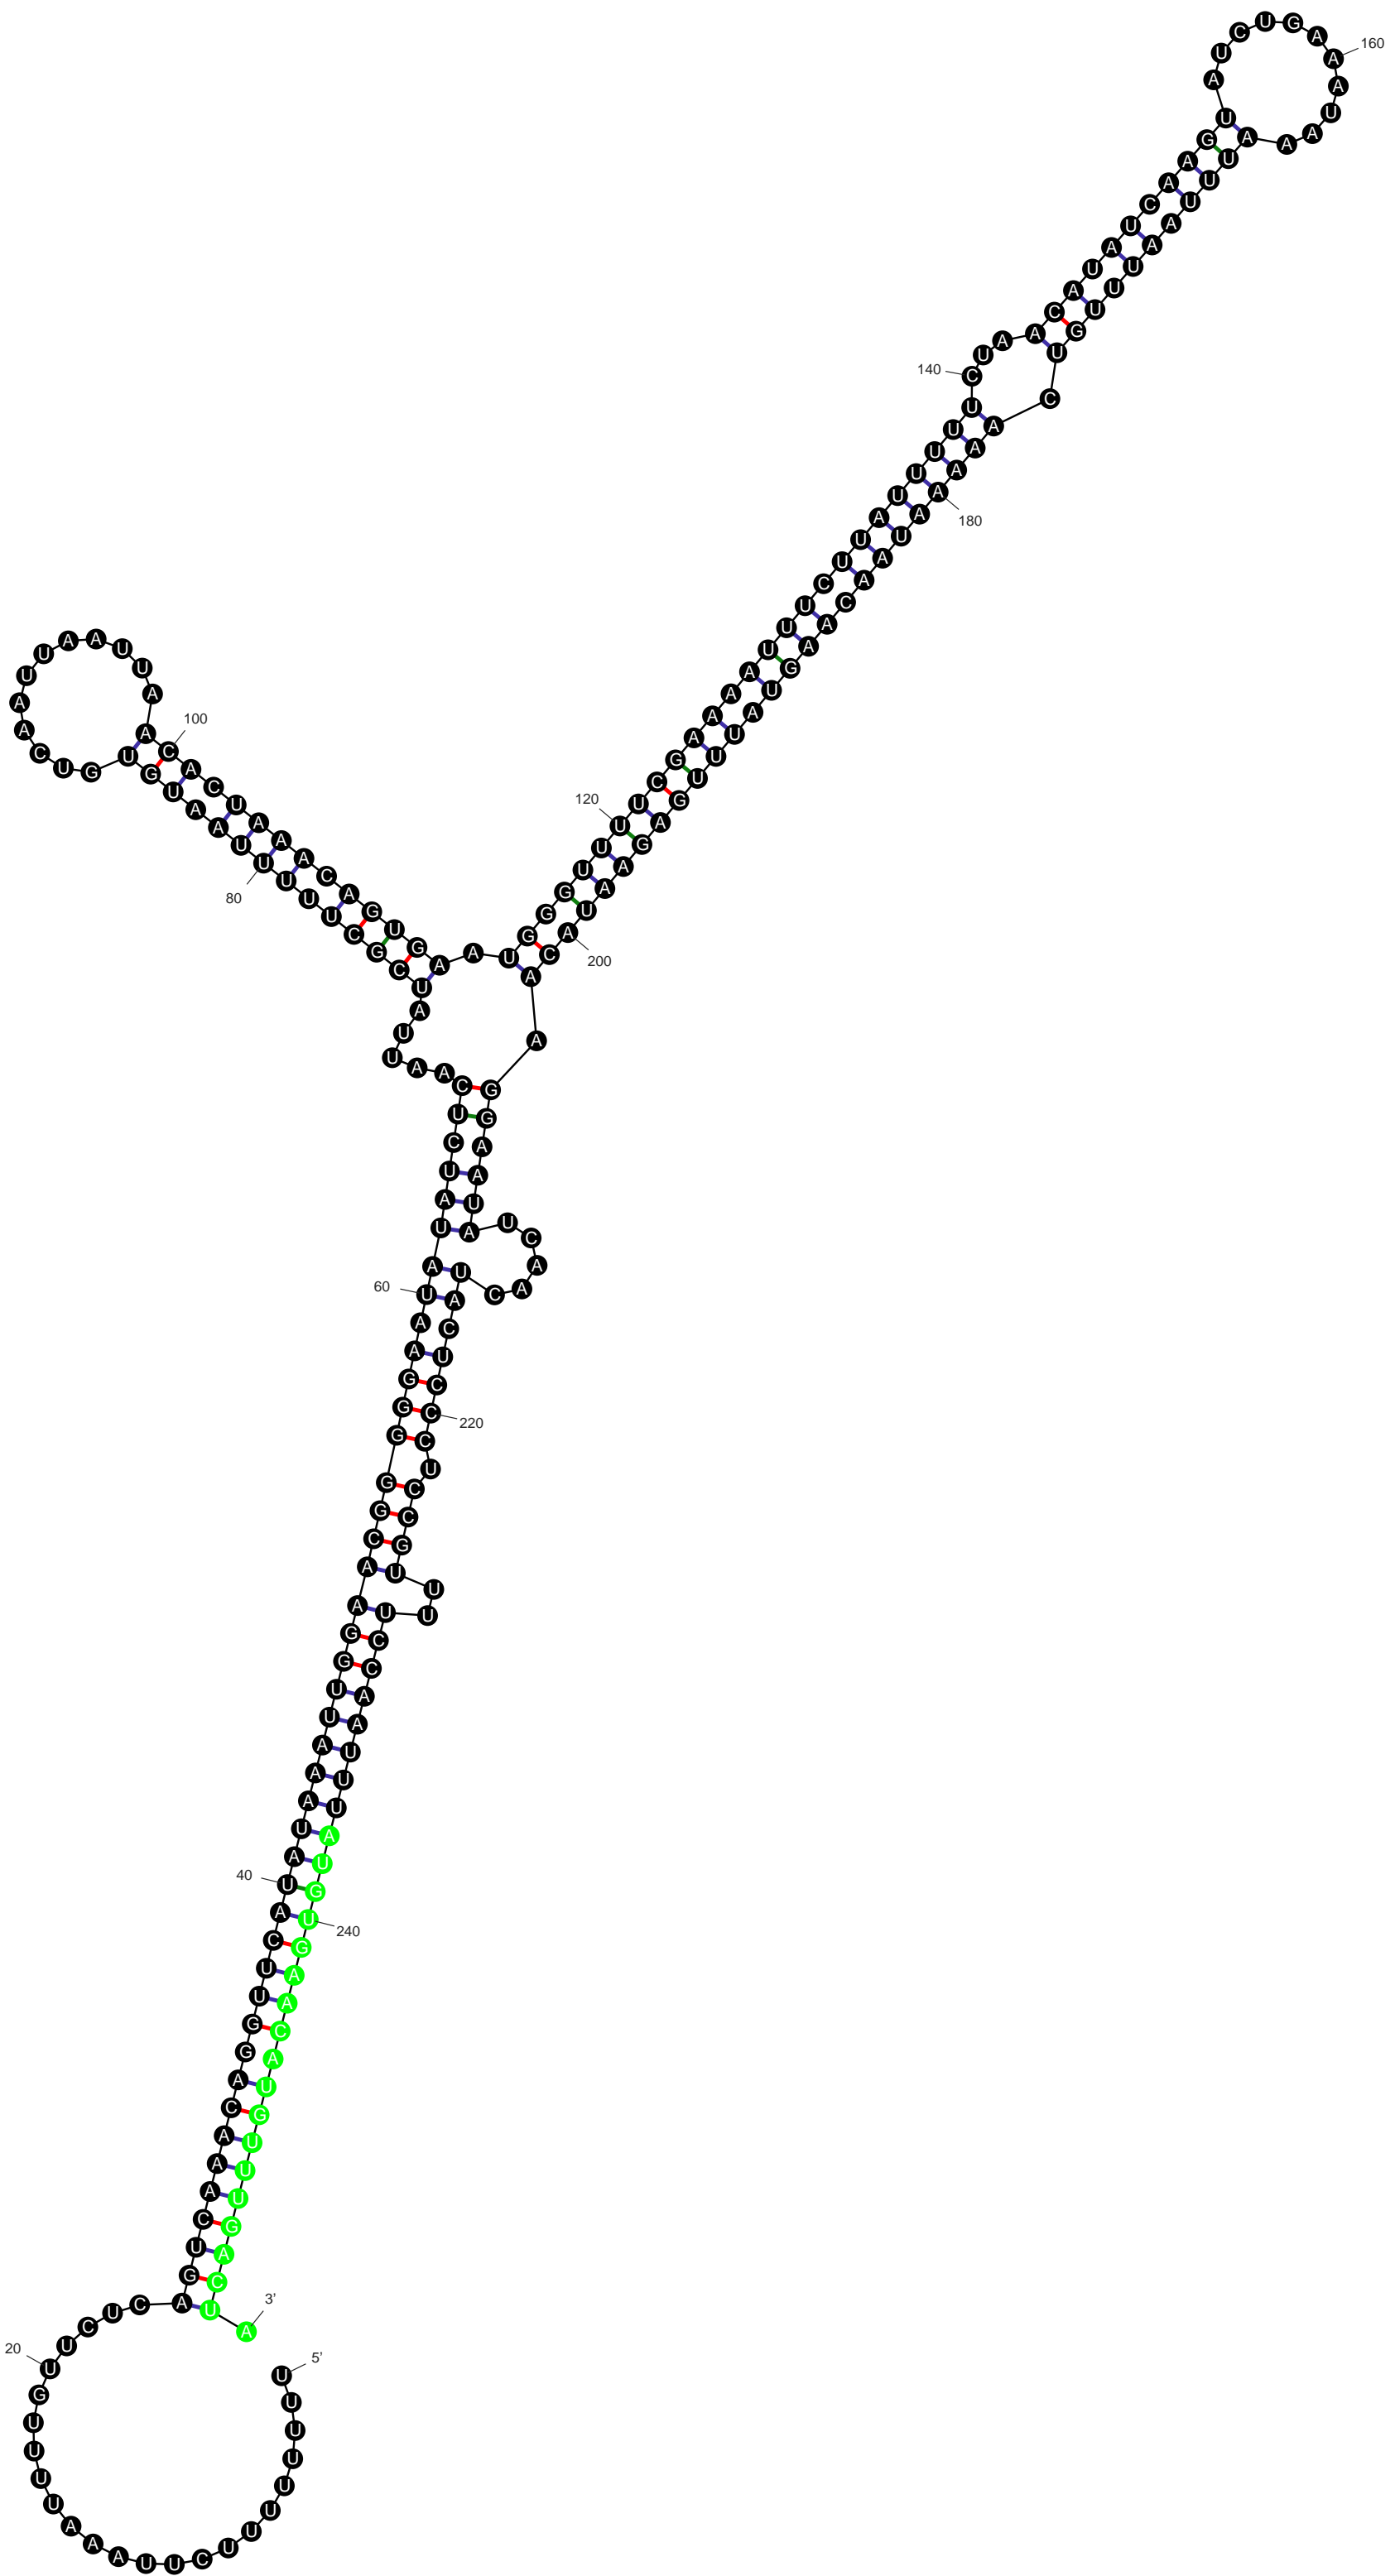

$dG = -64.10$  nta-miRn20

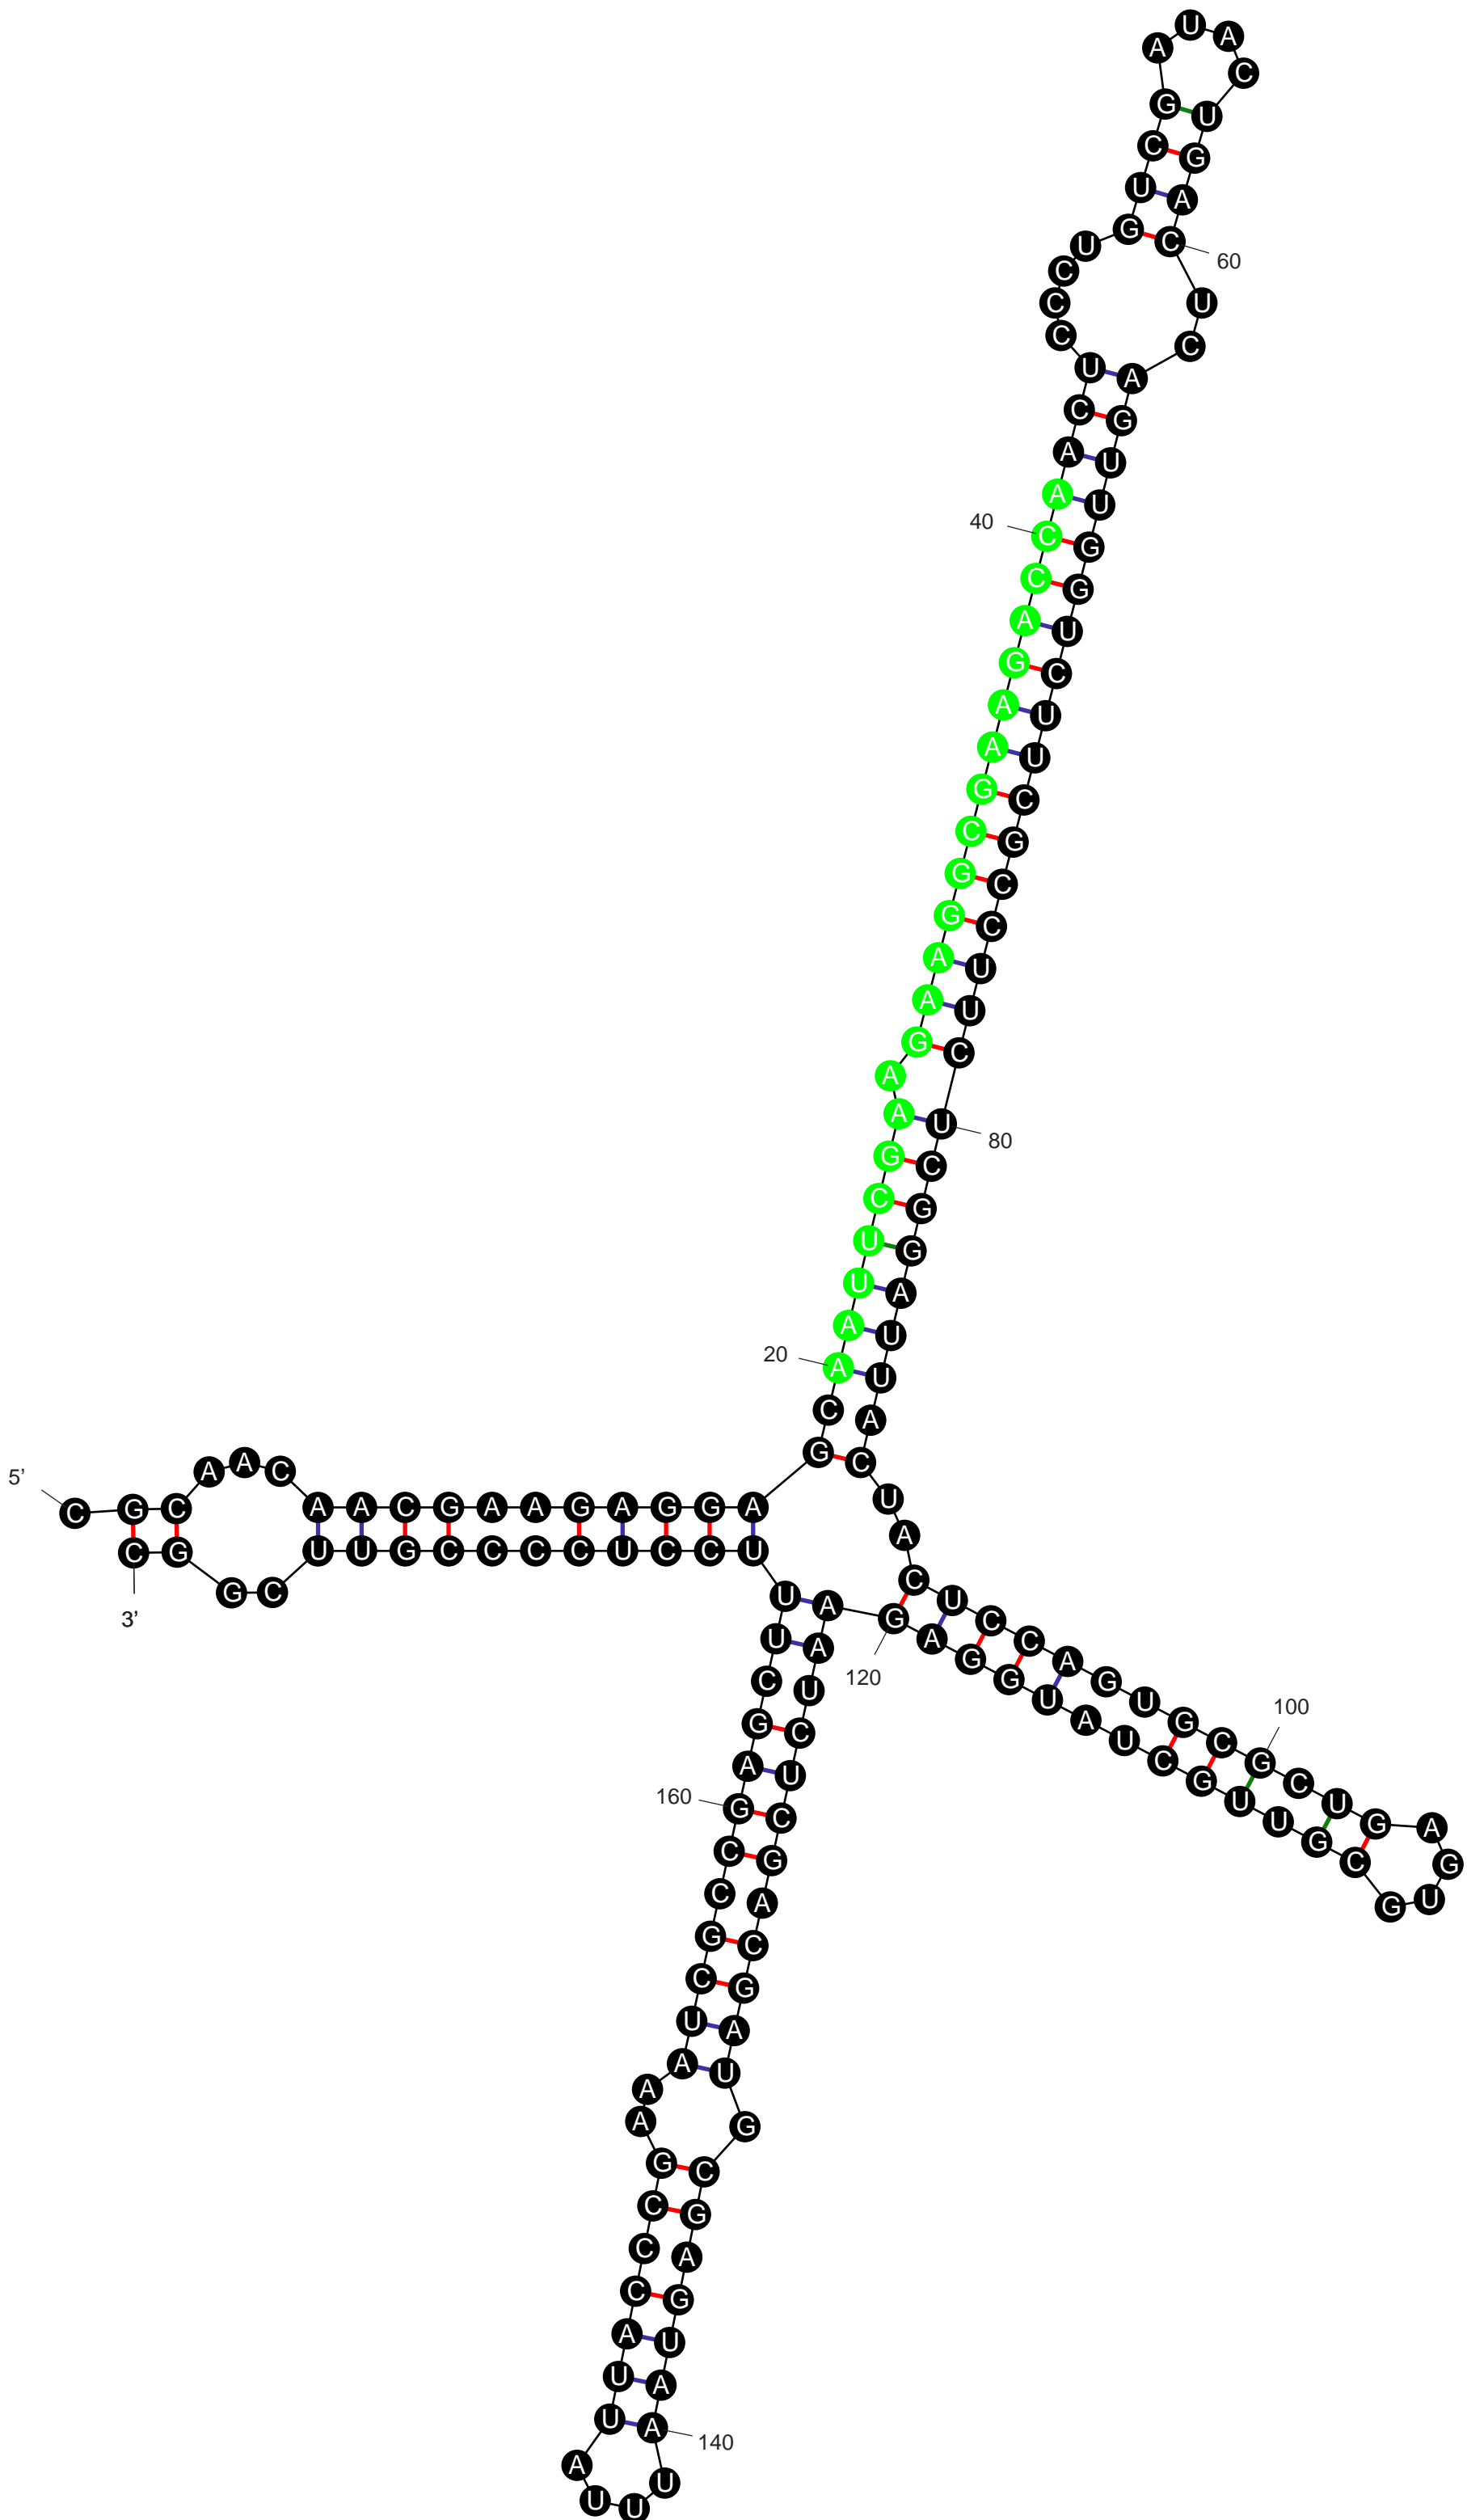

$dG = -70.20$  nta-miRn21

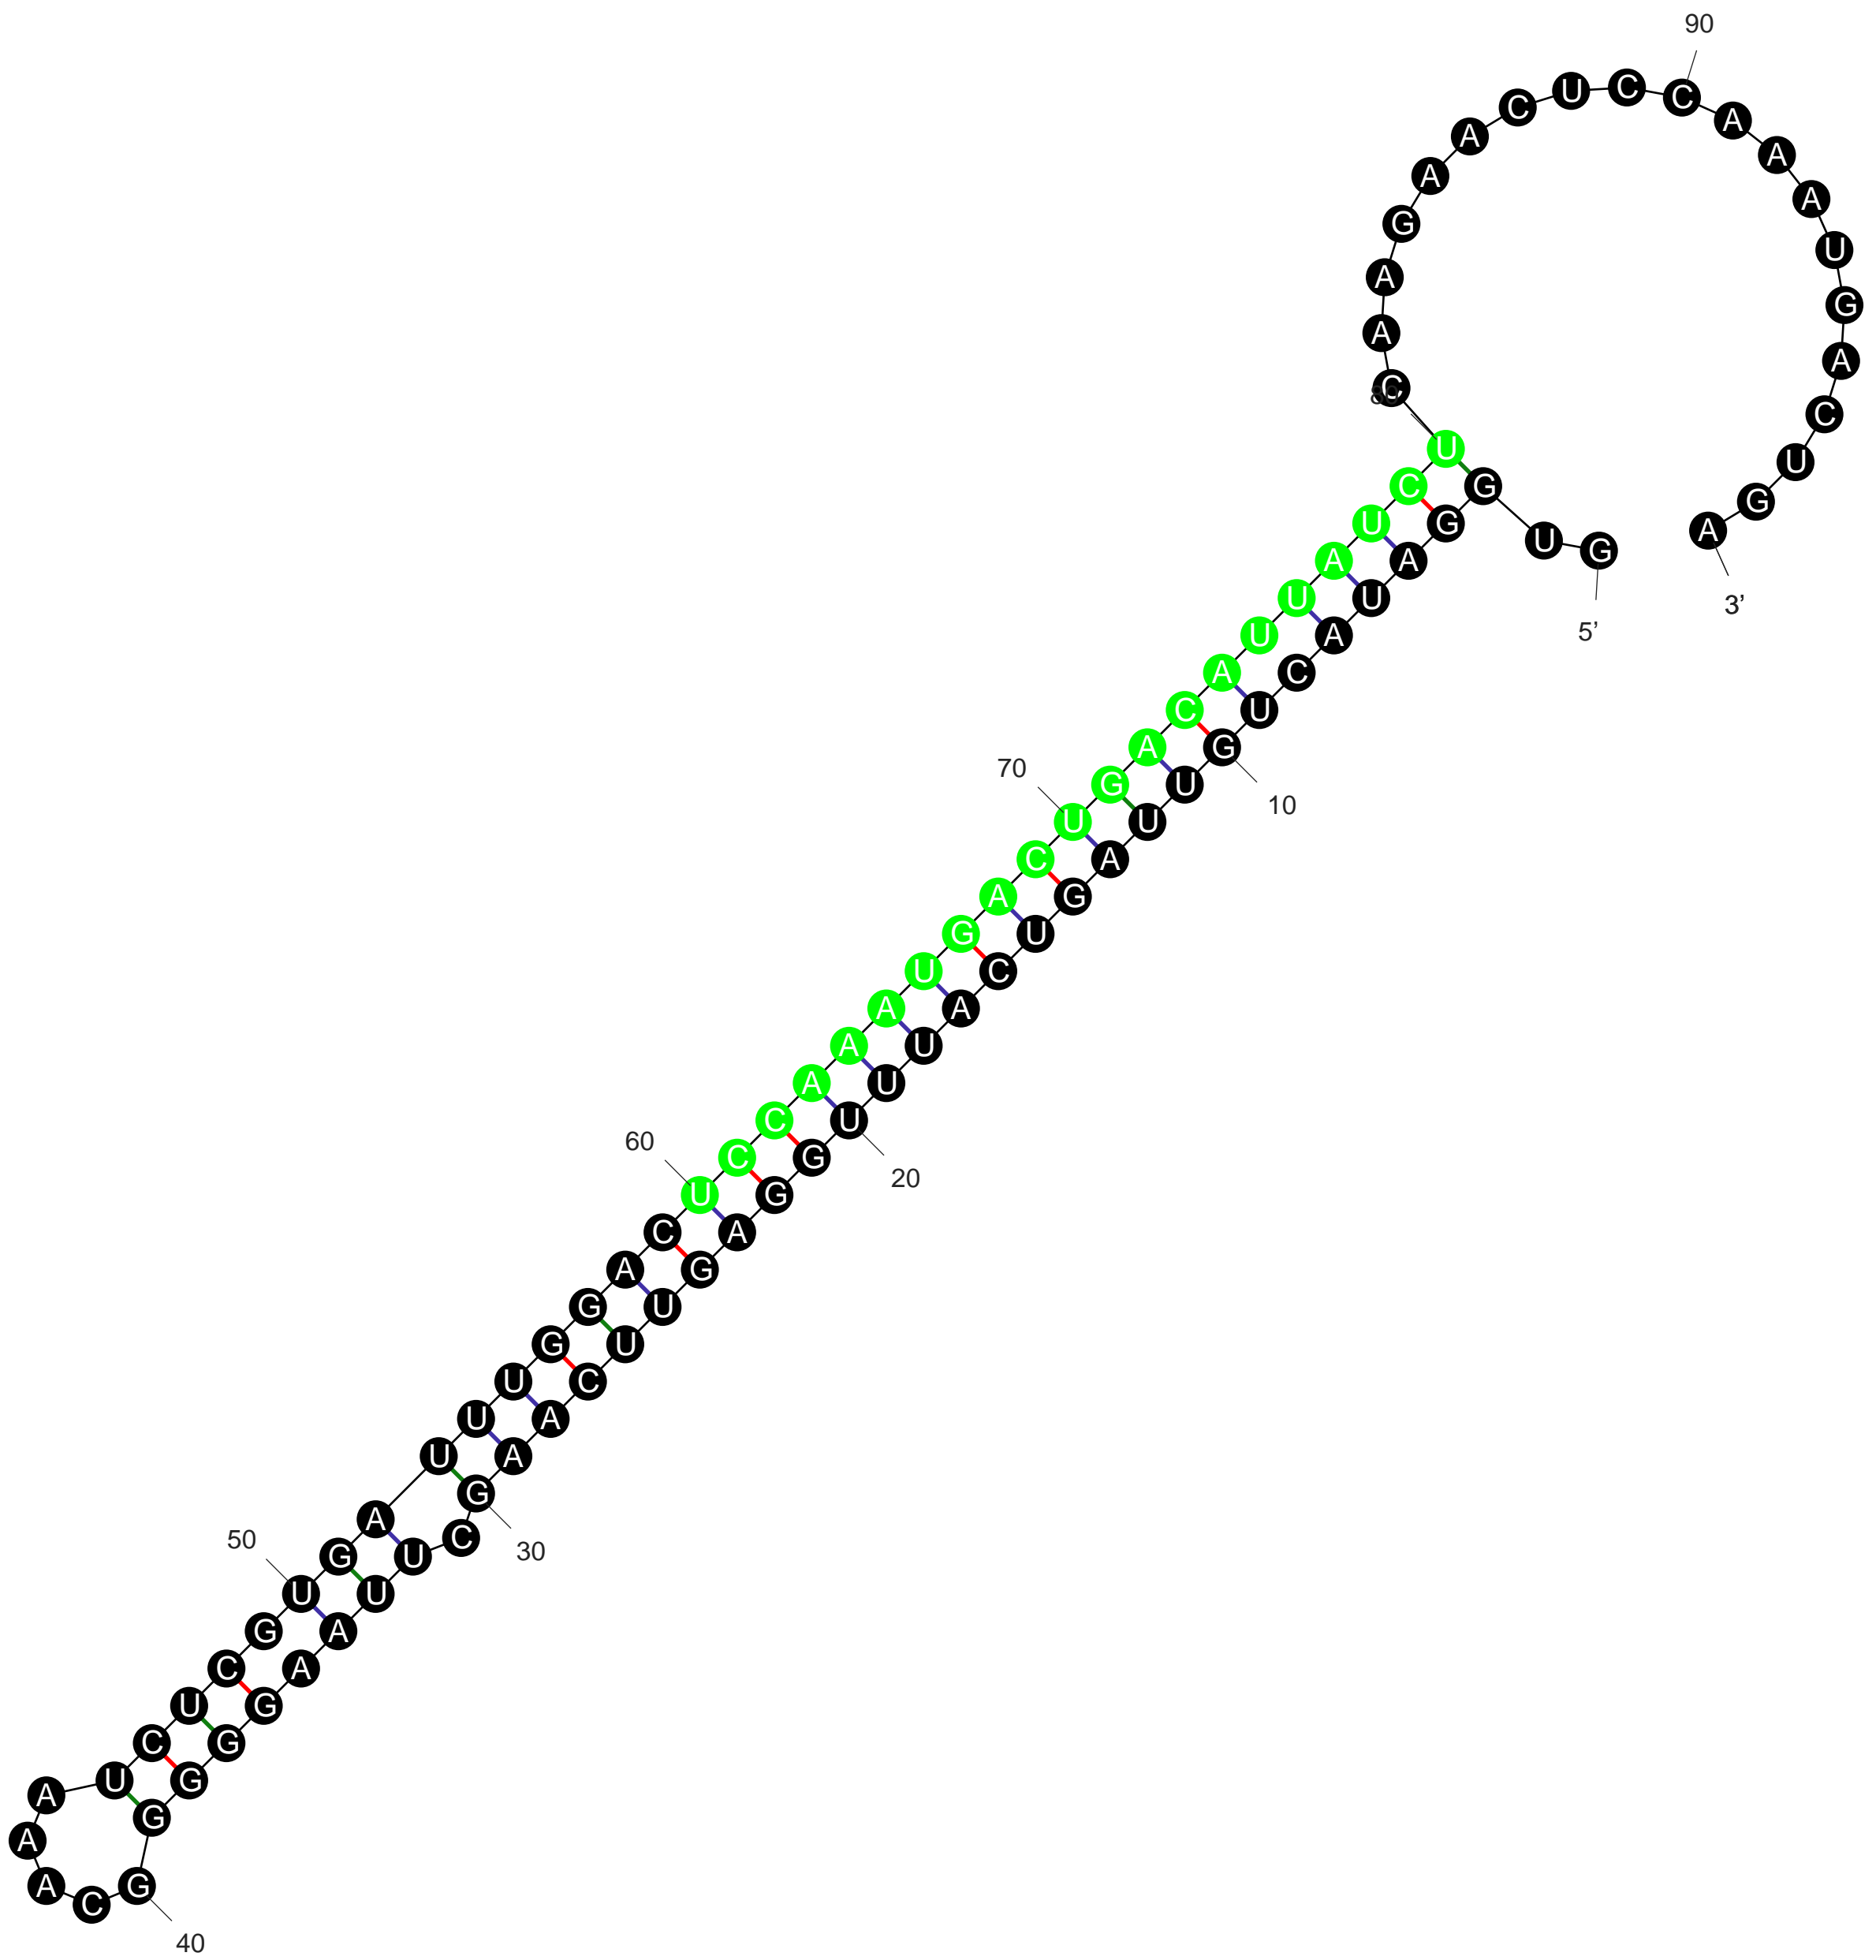

$dG = -39.00$  nta-miRn22

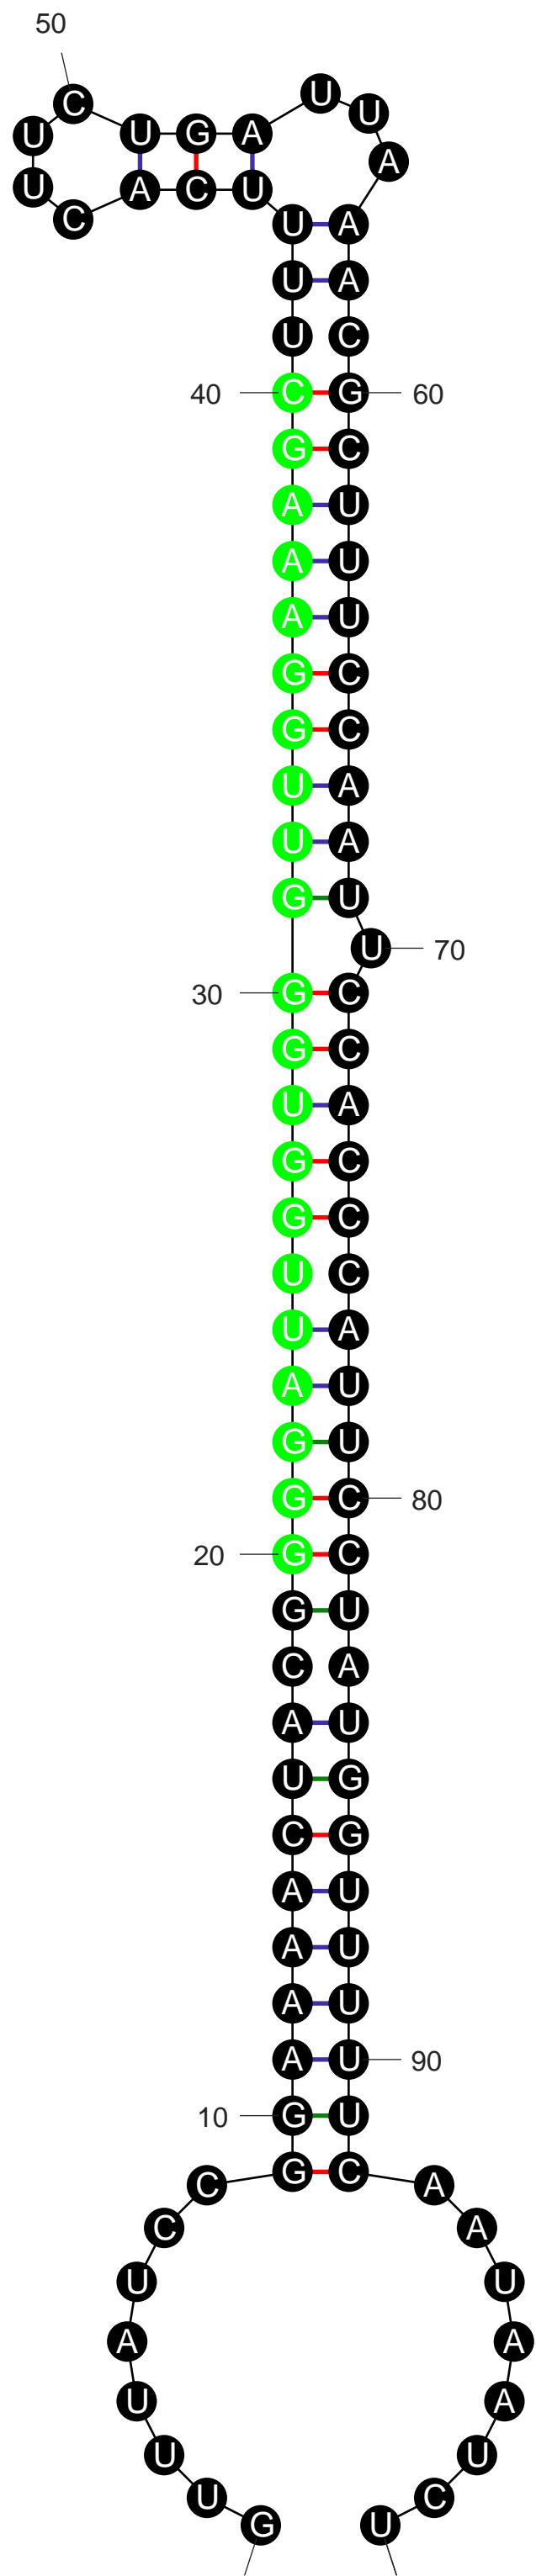

$dG = -38.10$  nta-miRn23







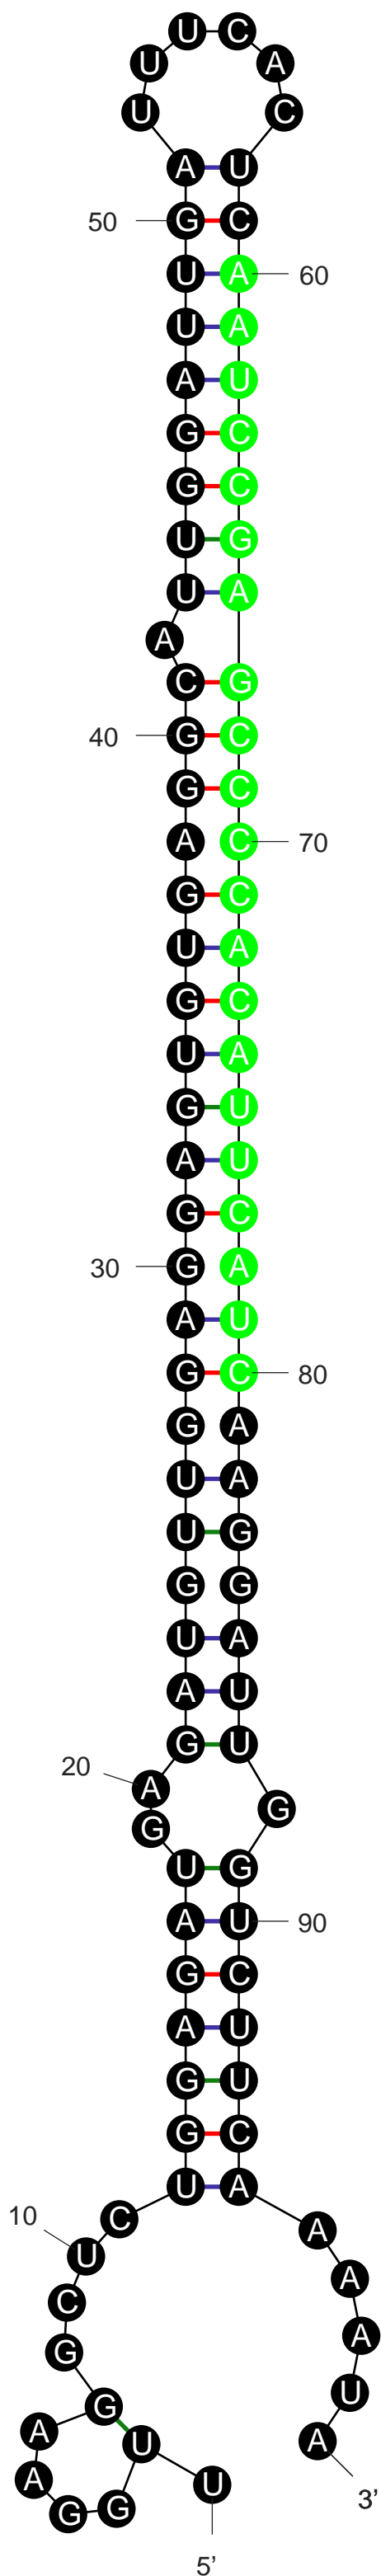

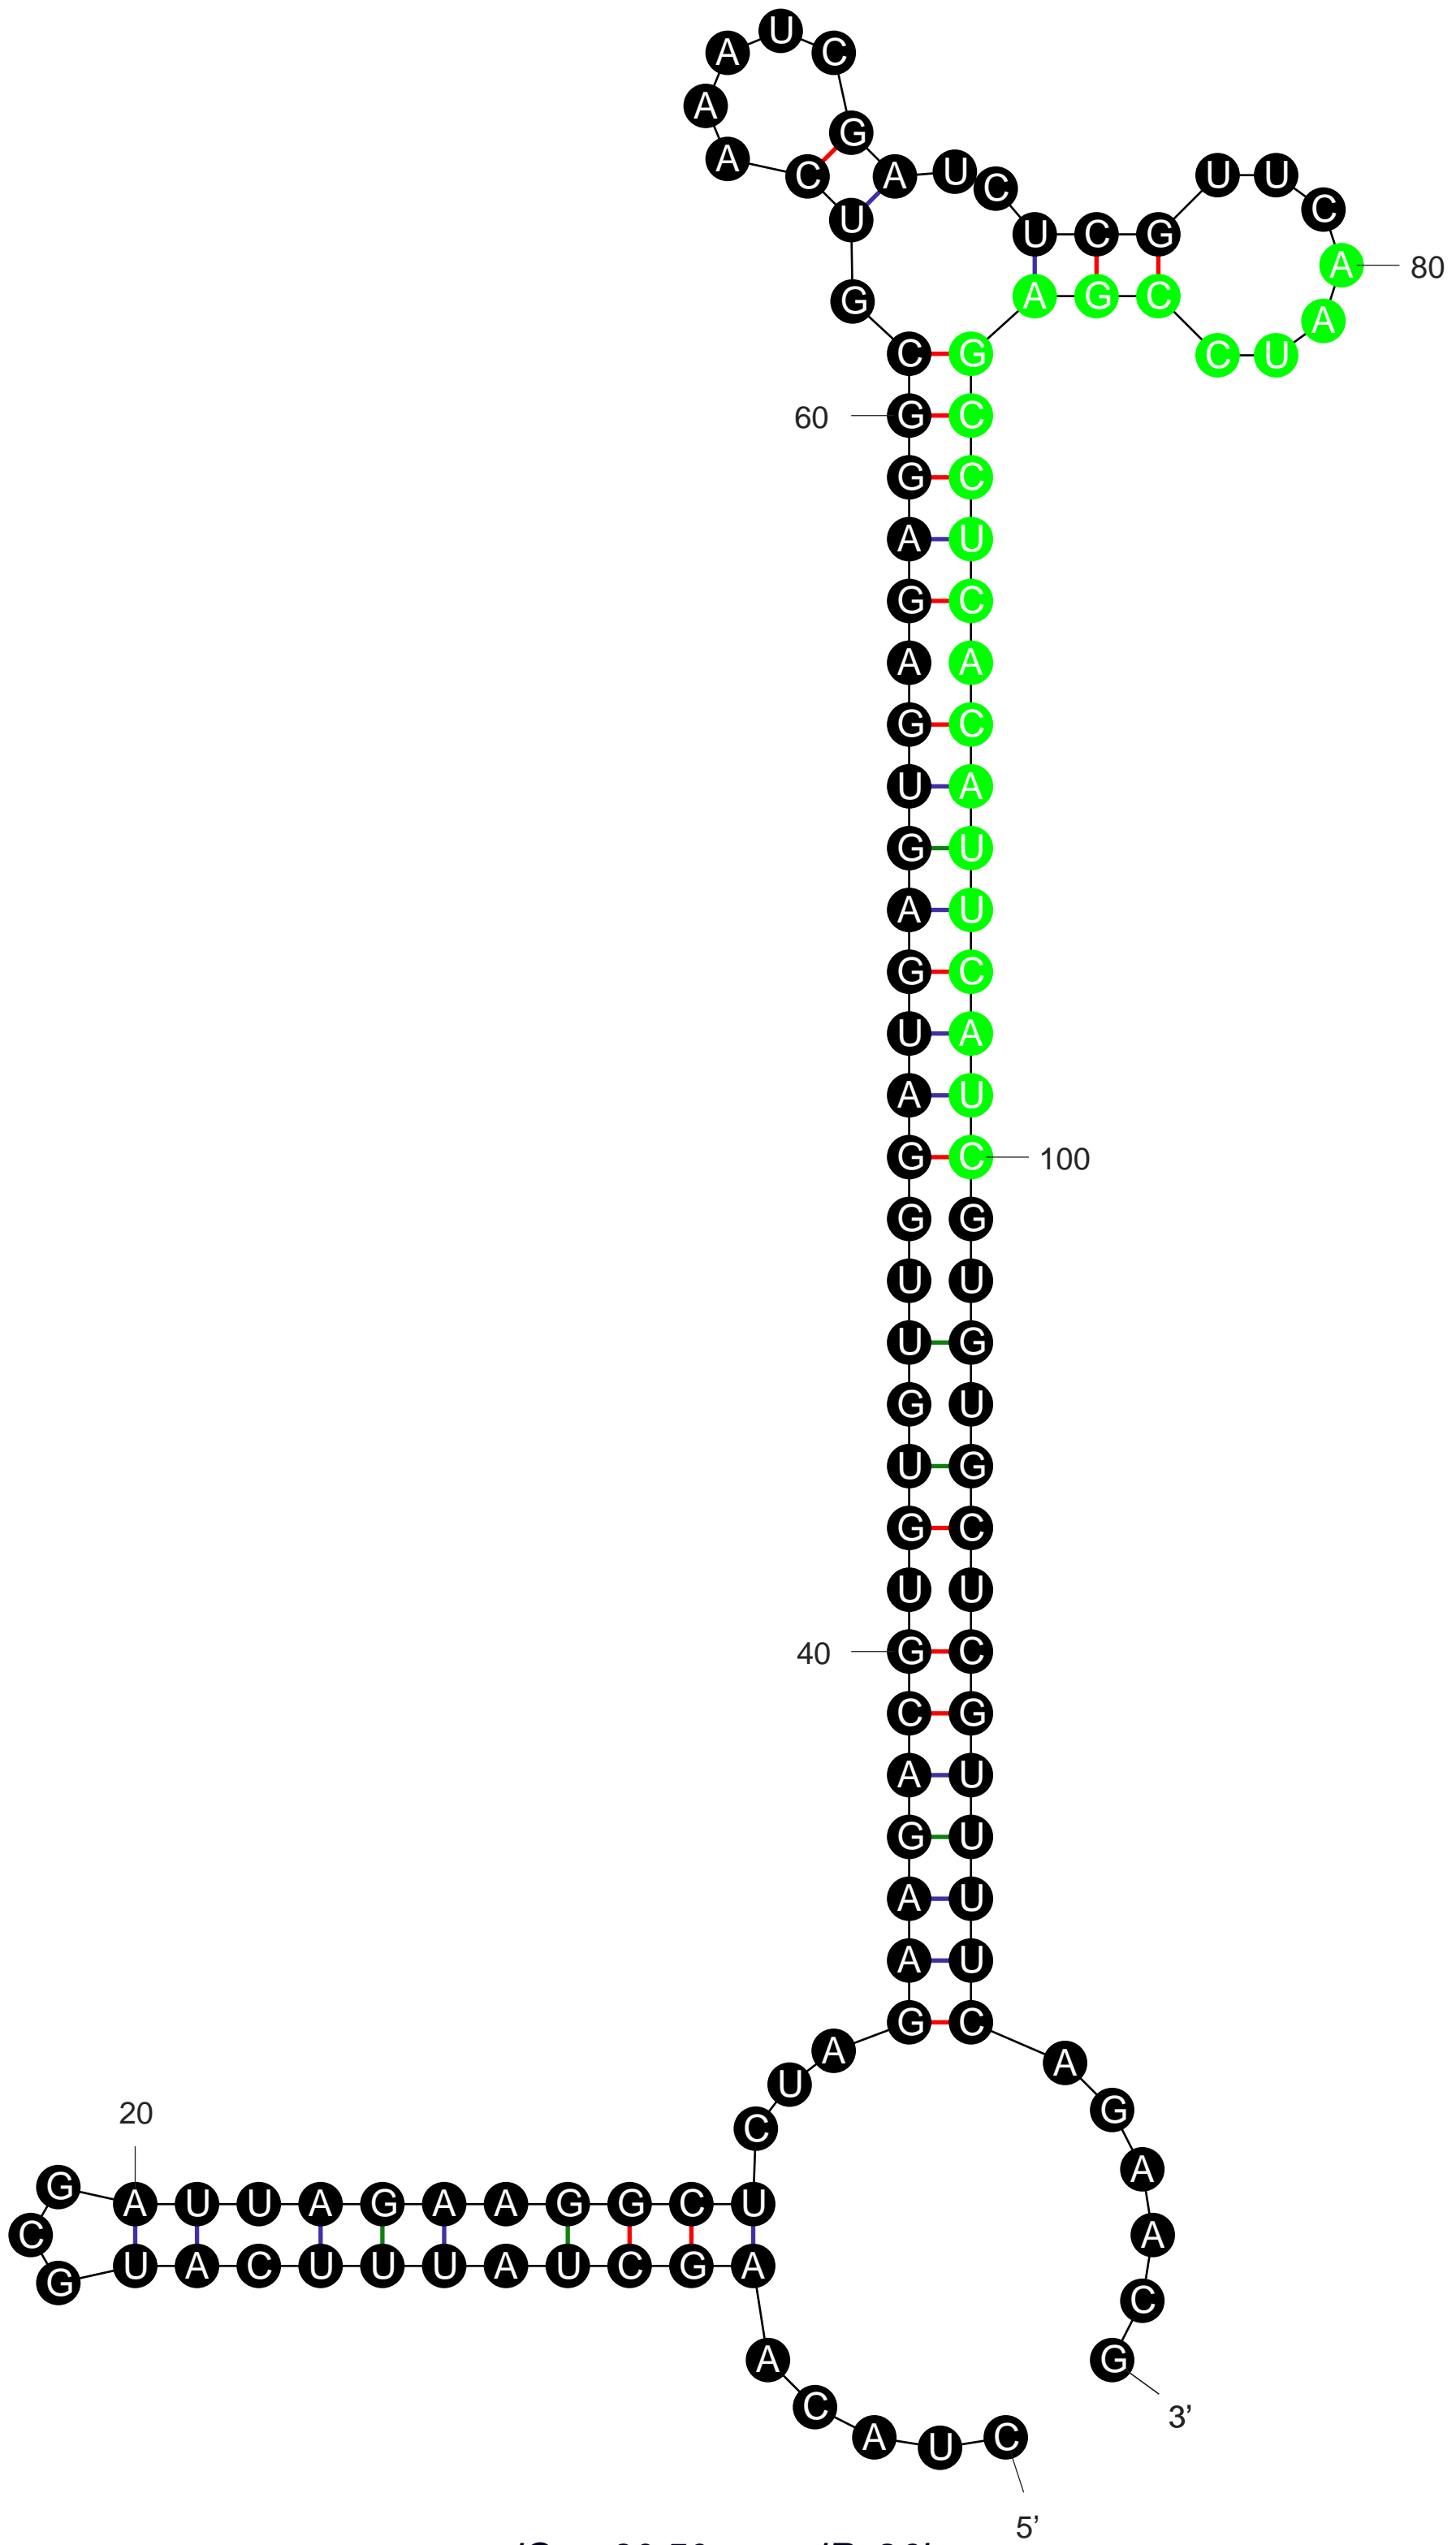

$dG = -30.50$  nta-miRn26b

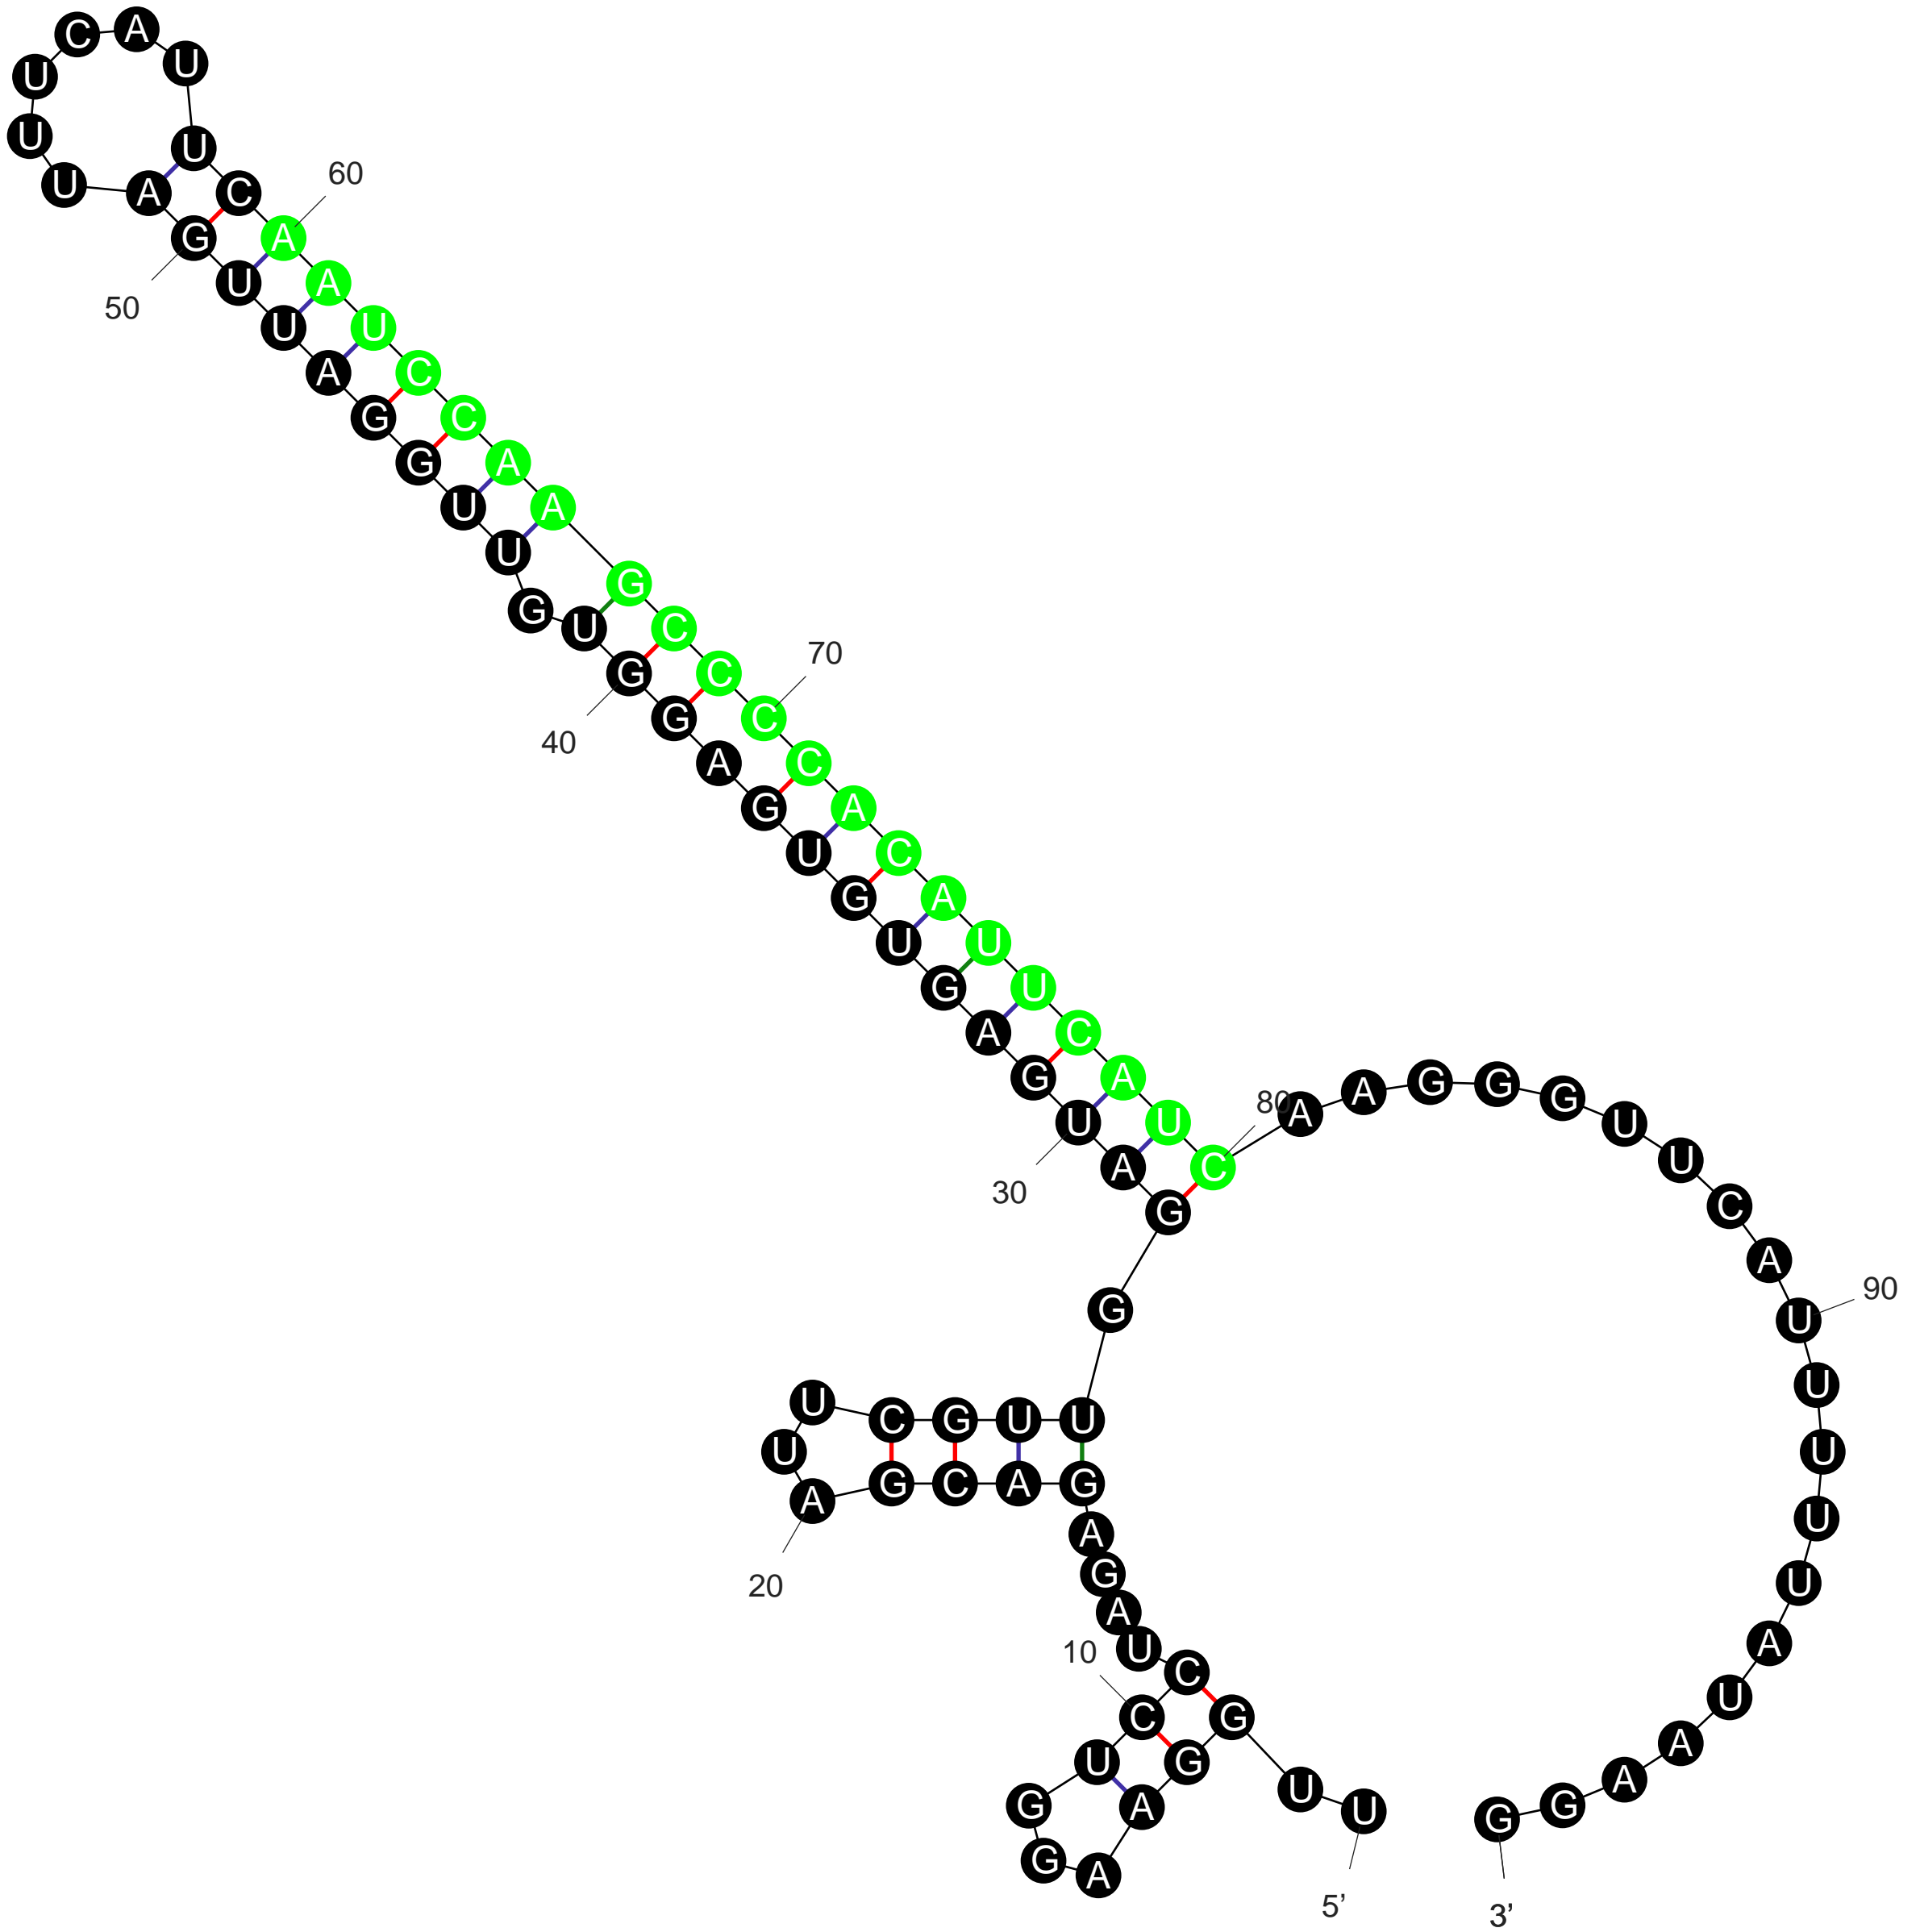

dG = -31.70 nta-miRn26c

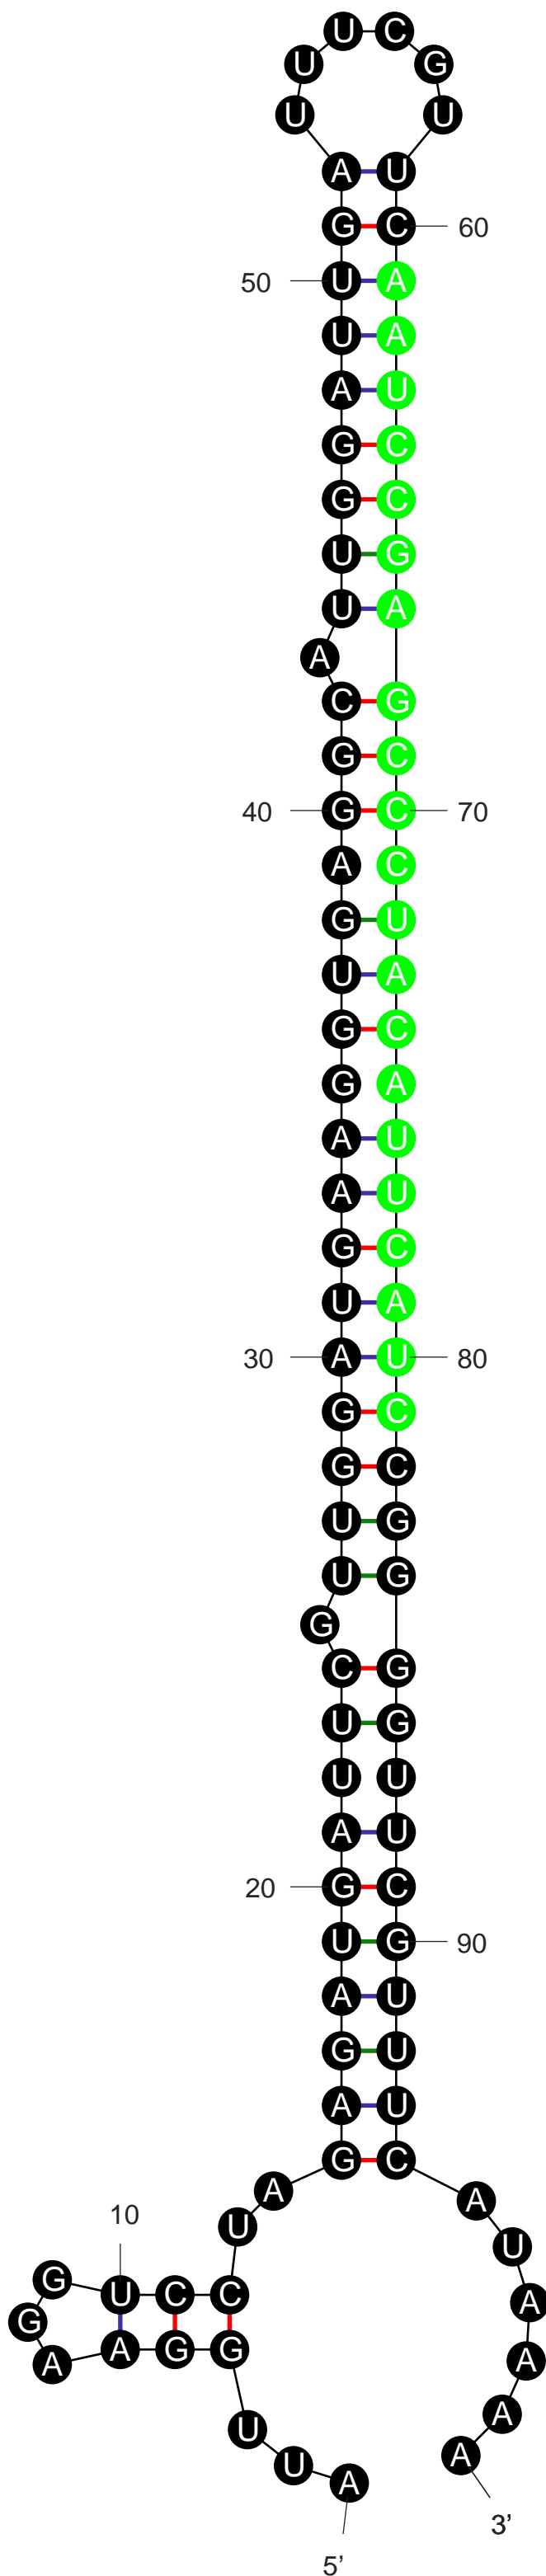

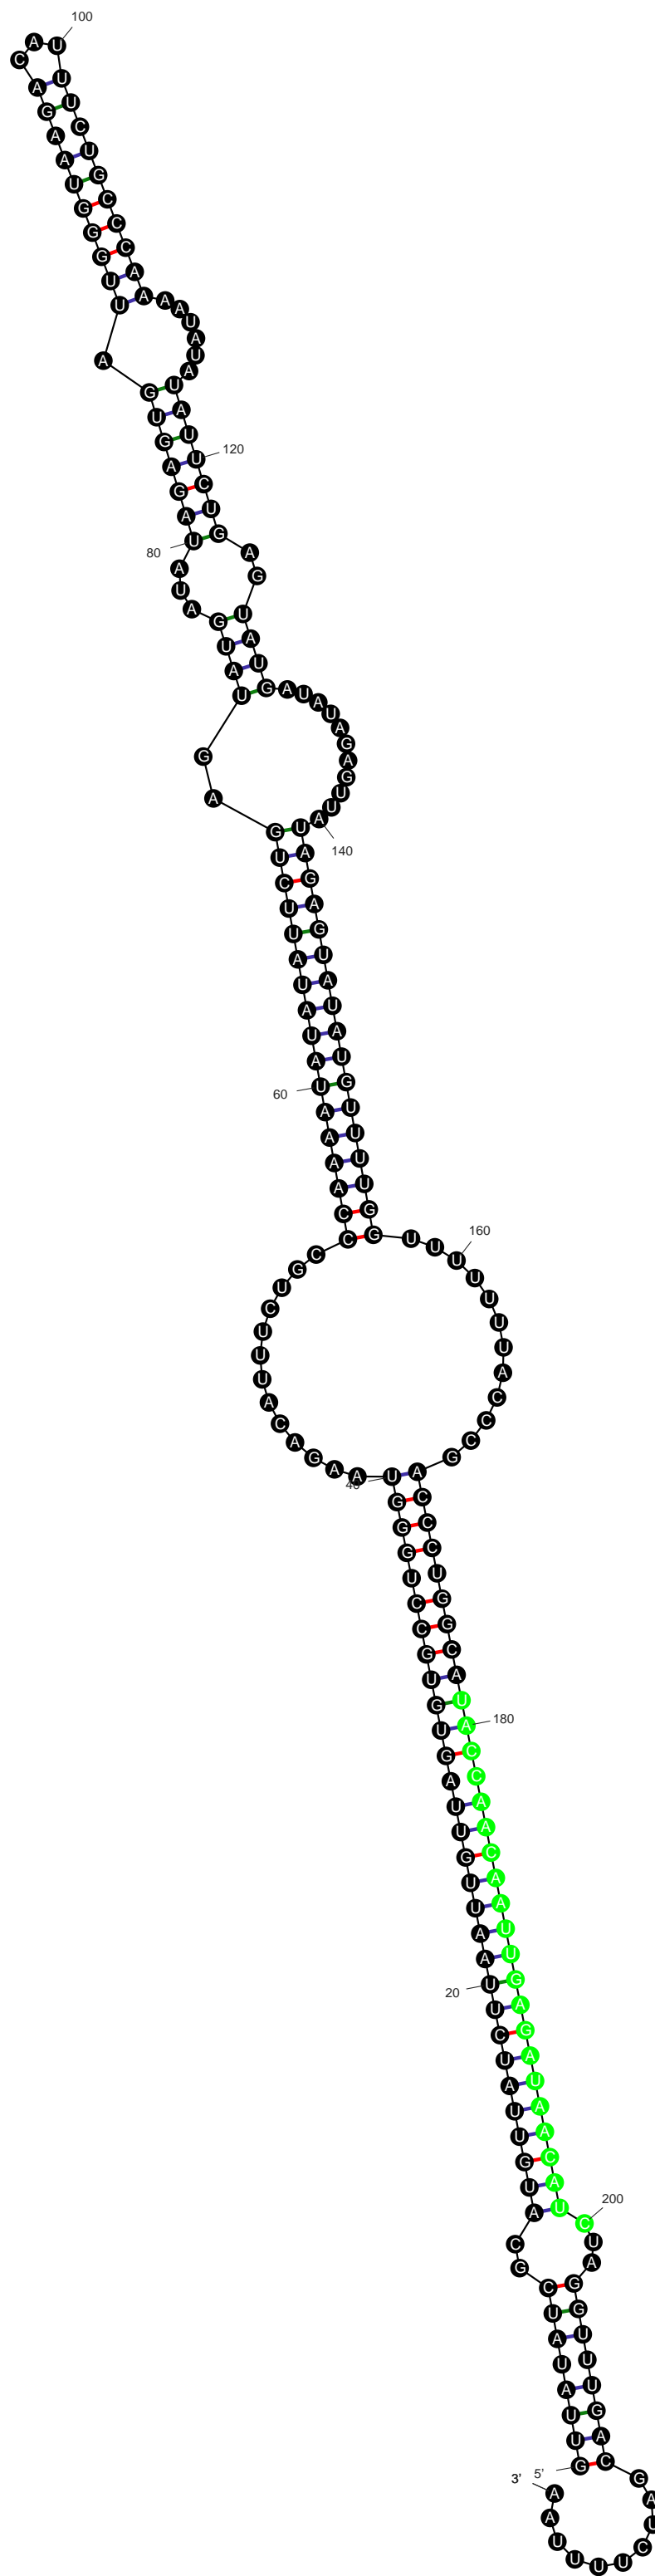

$dG = -66.40$  nta-miRn27a

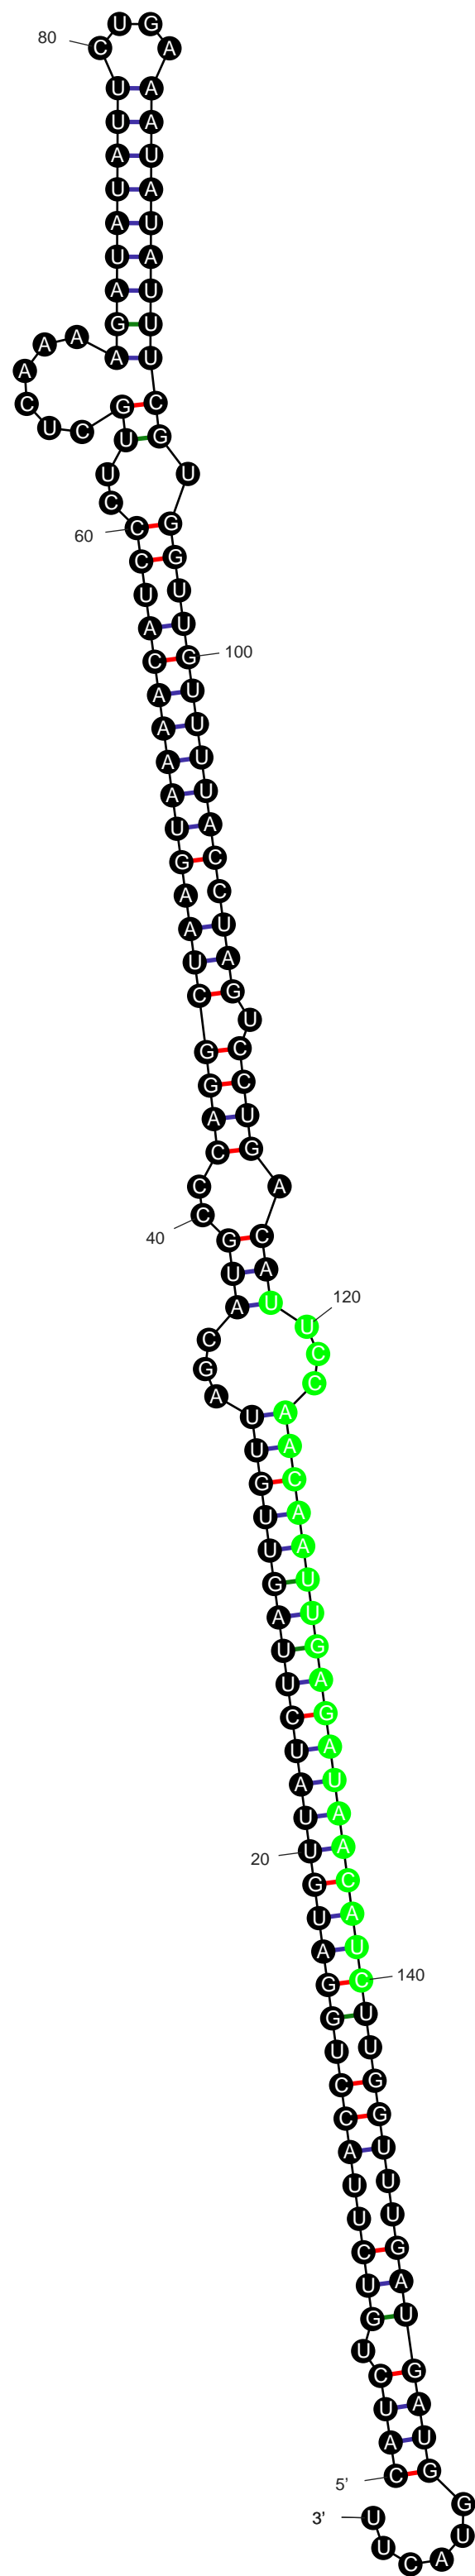

$dG = -50.10$  nta-miRn27b



$dG = -50.10$  nta-miRn27b



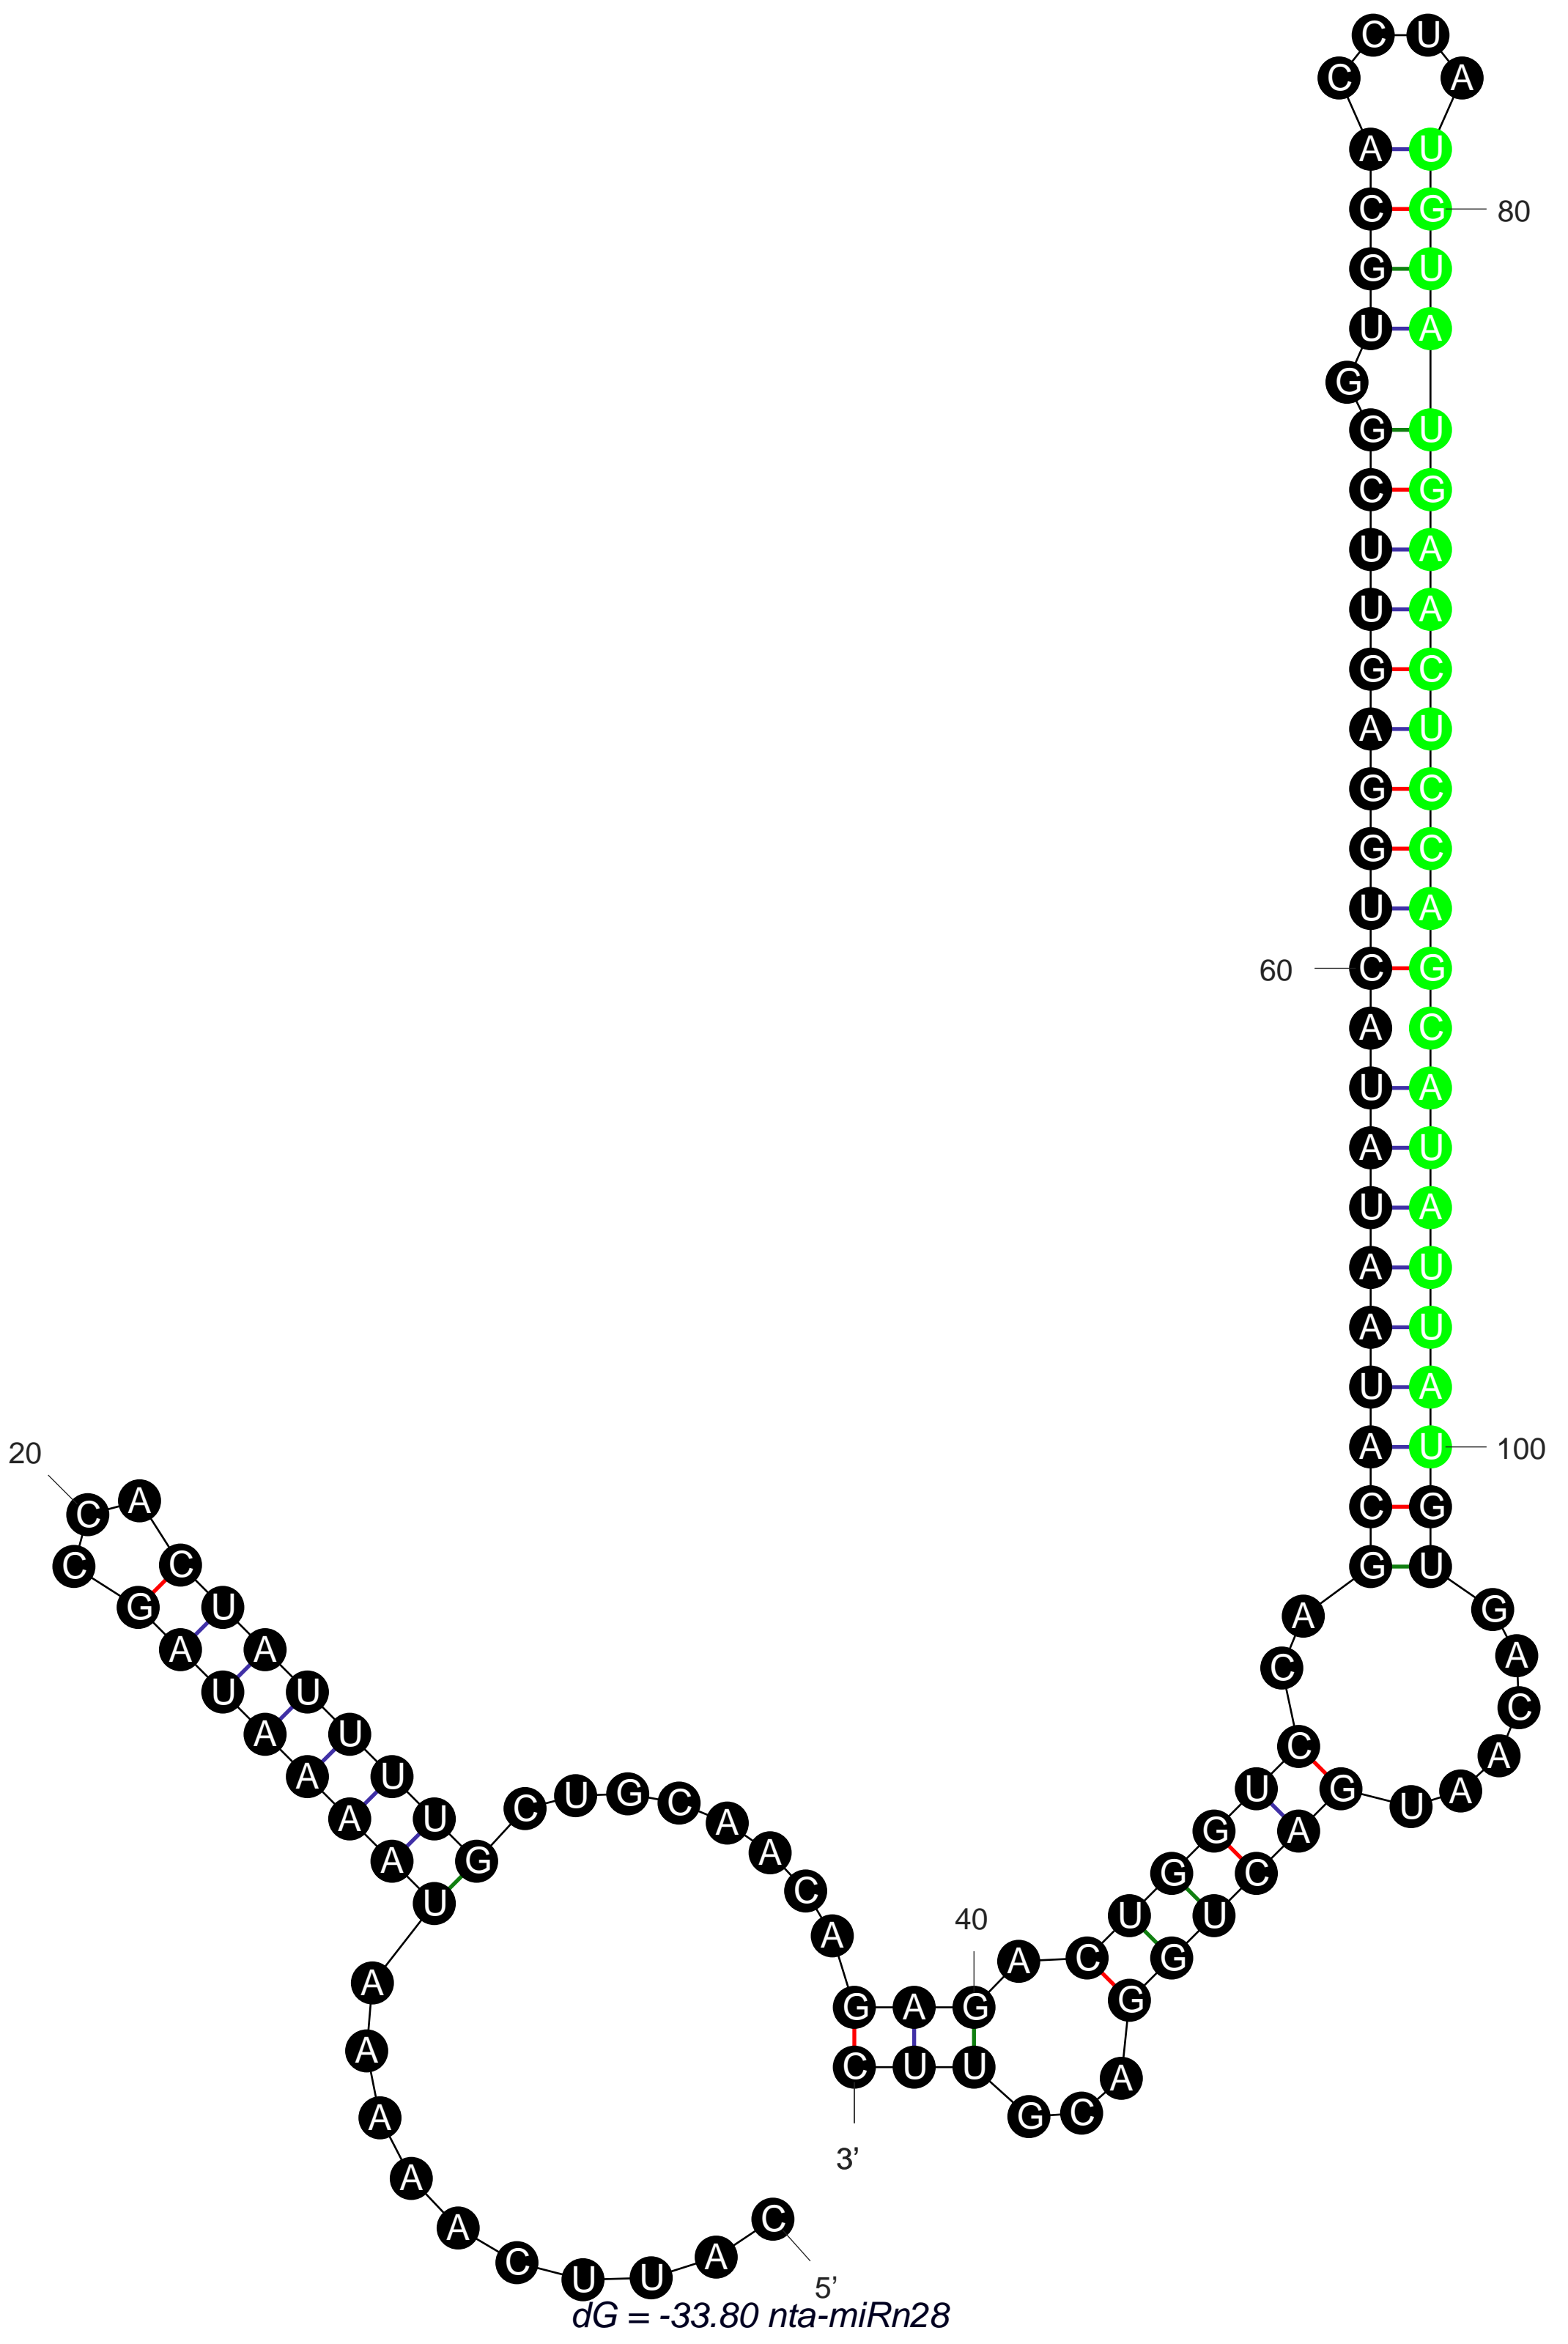



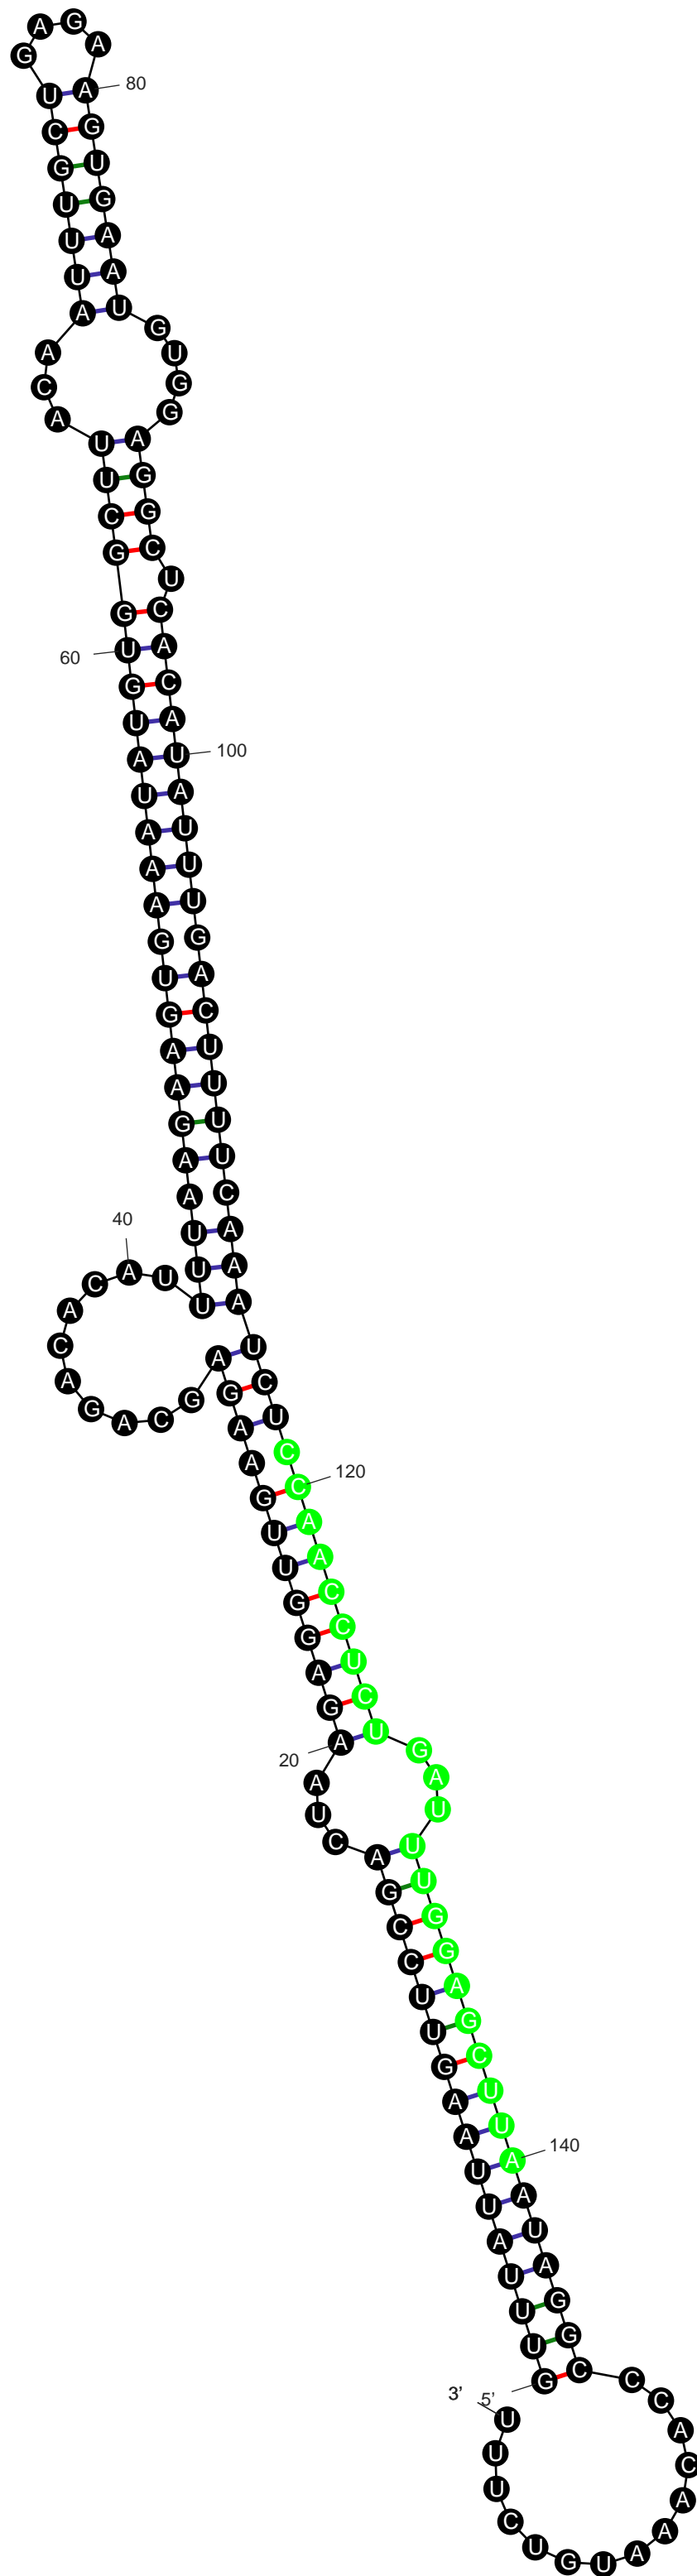

$dG = -54.80$  nta-miRn30



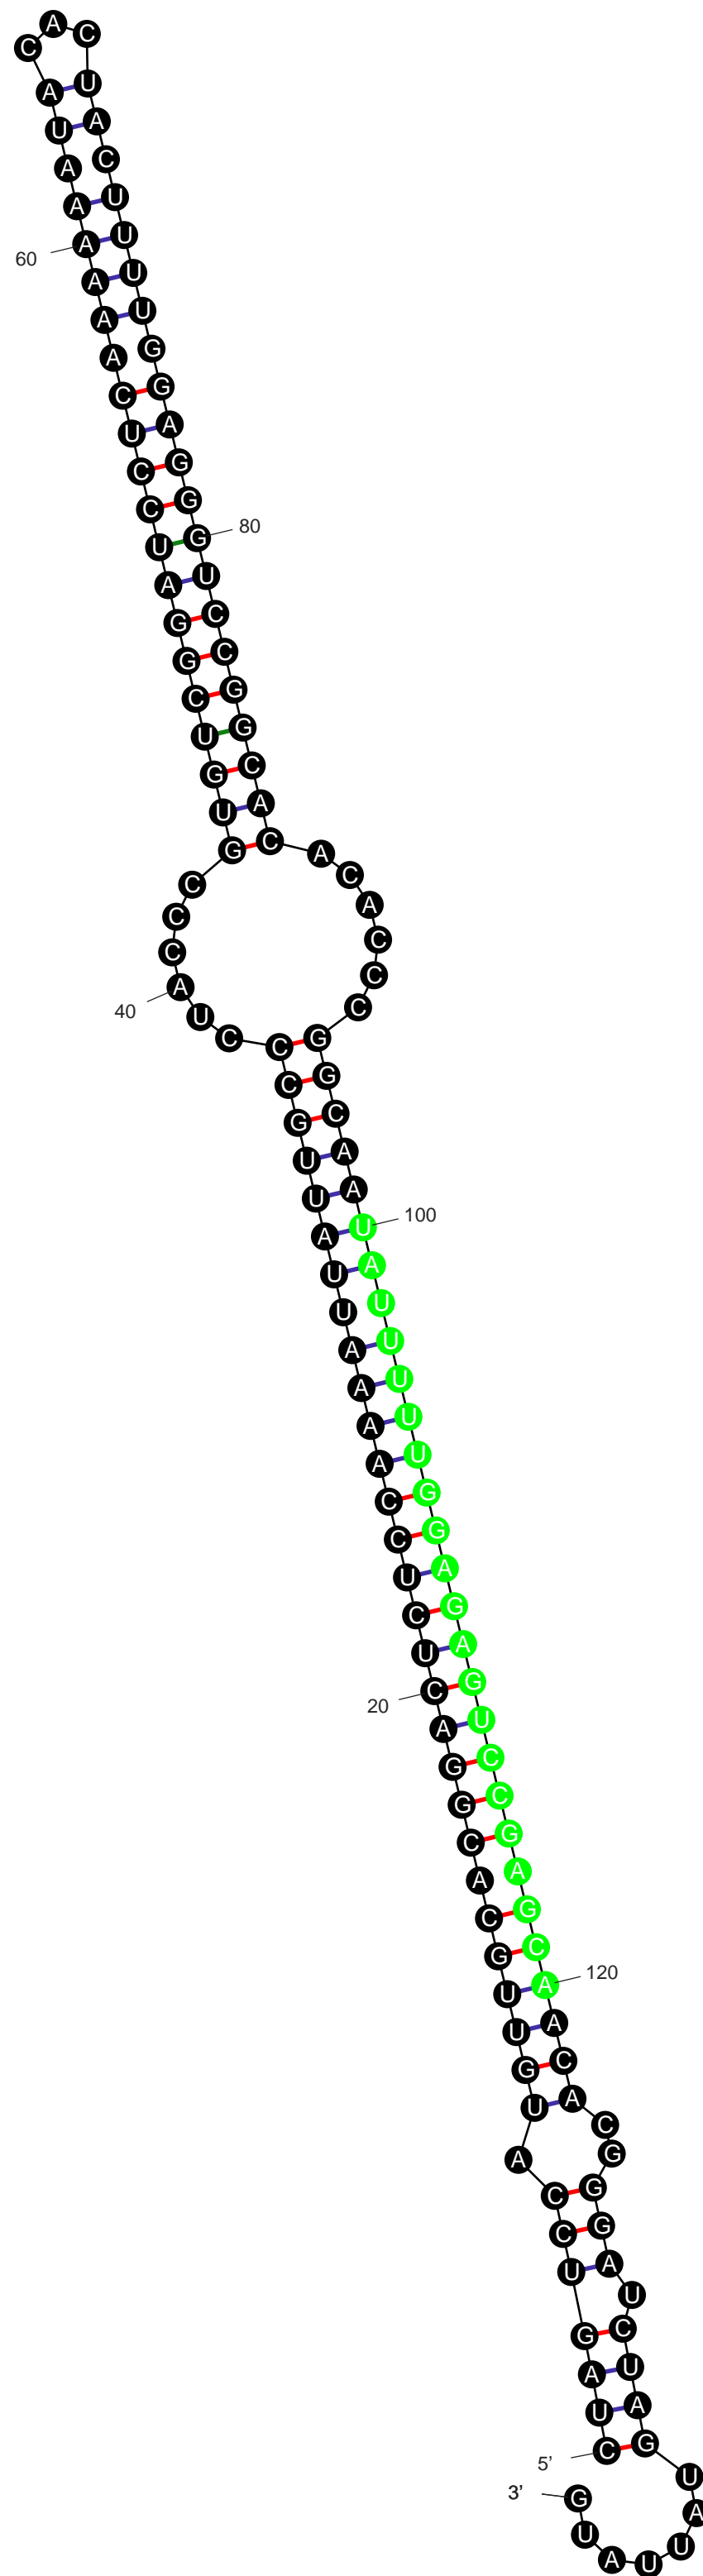

$dG = -69.50$  nta-miRn32

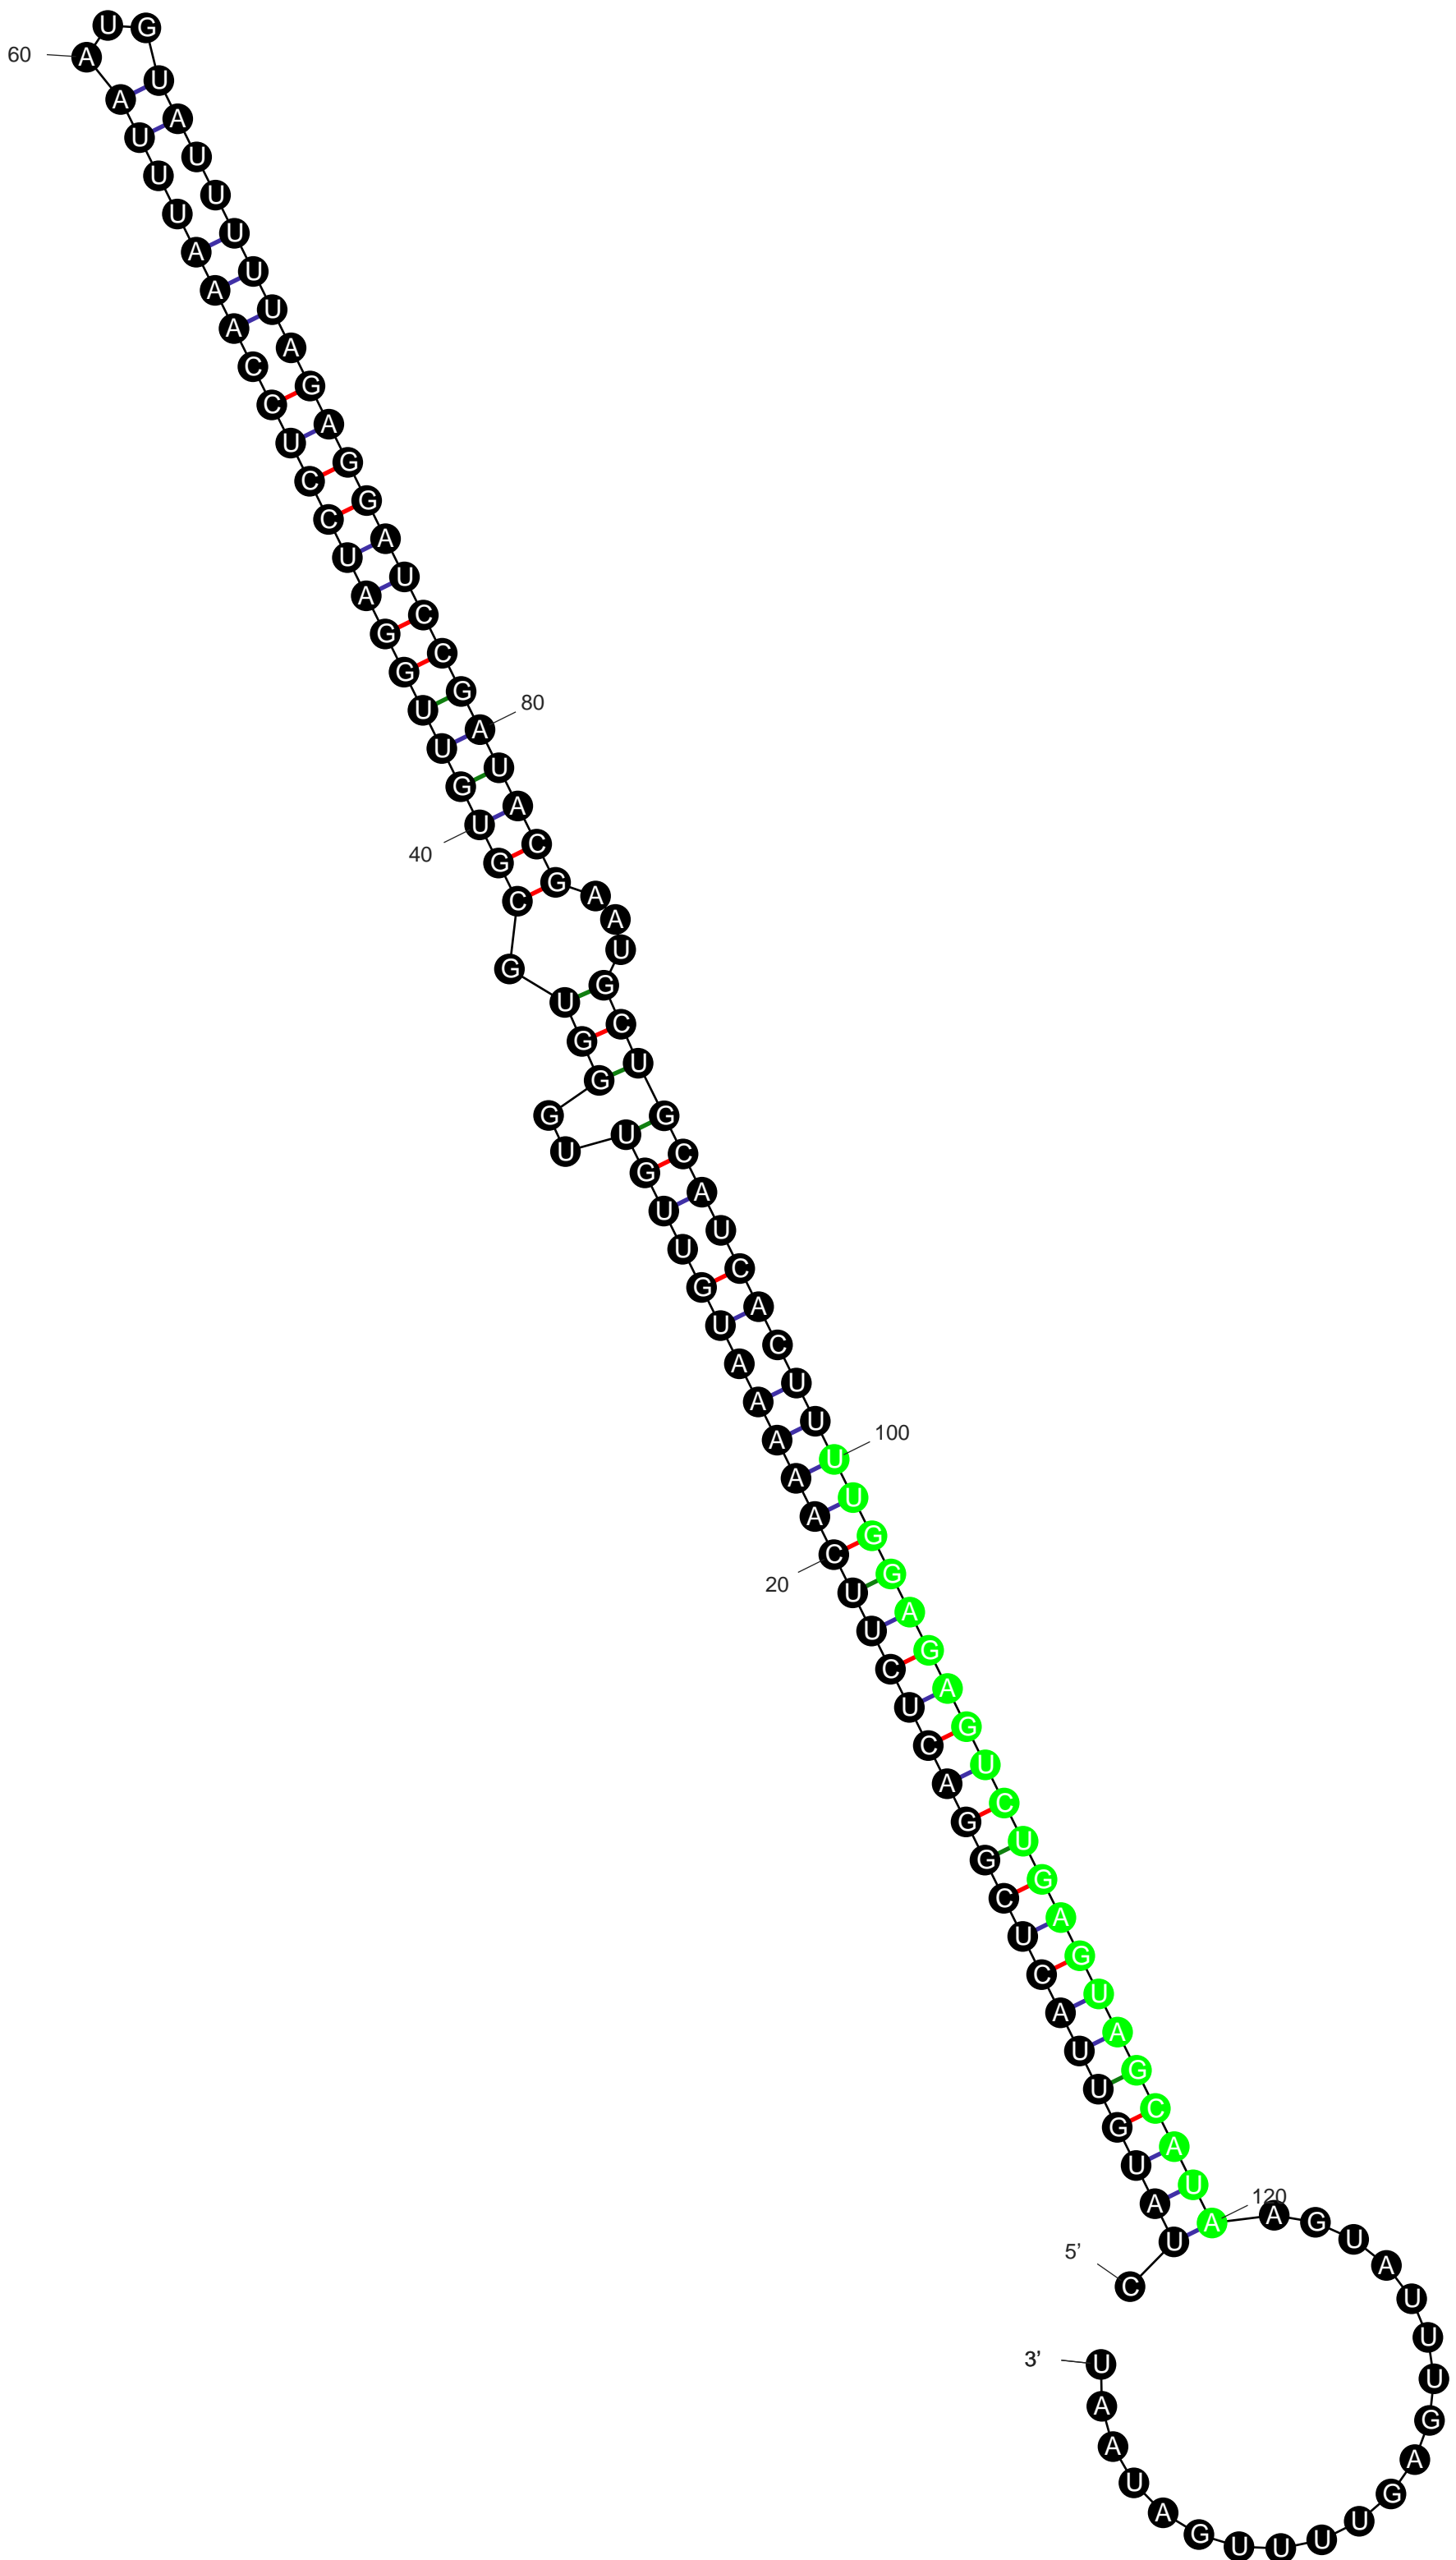

$dG = -57.90$  nta-miRn33



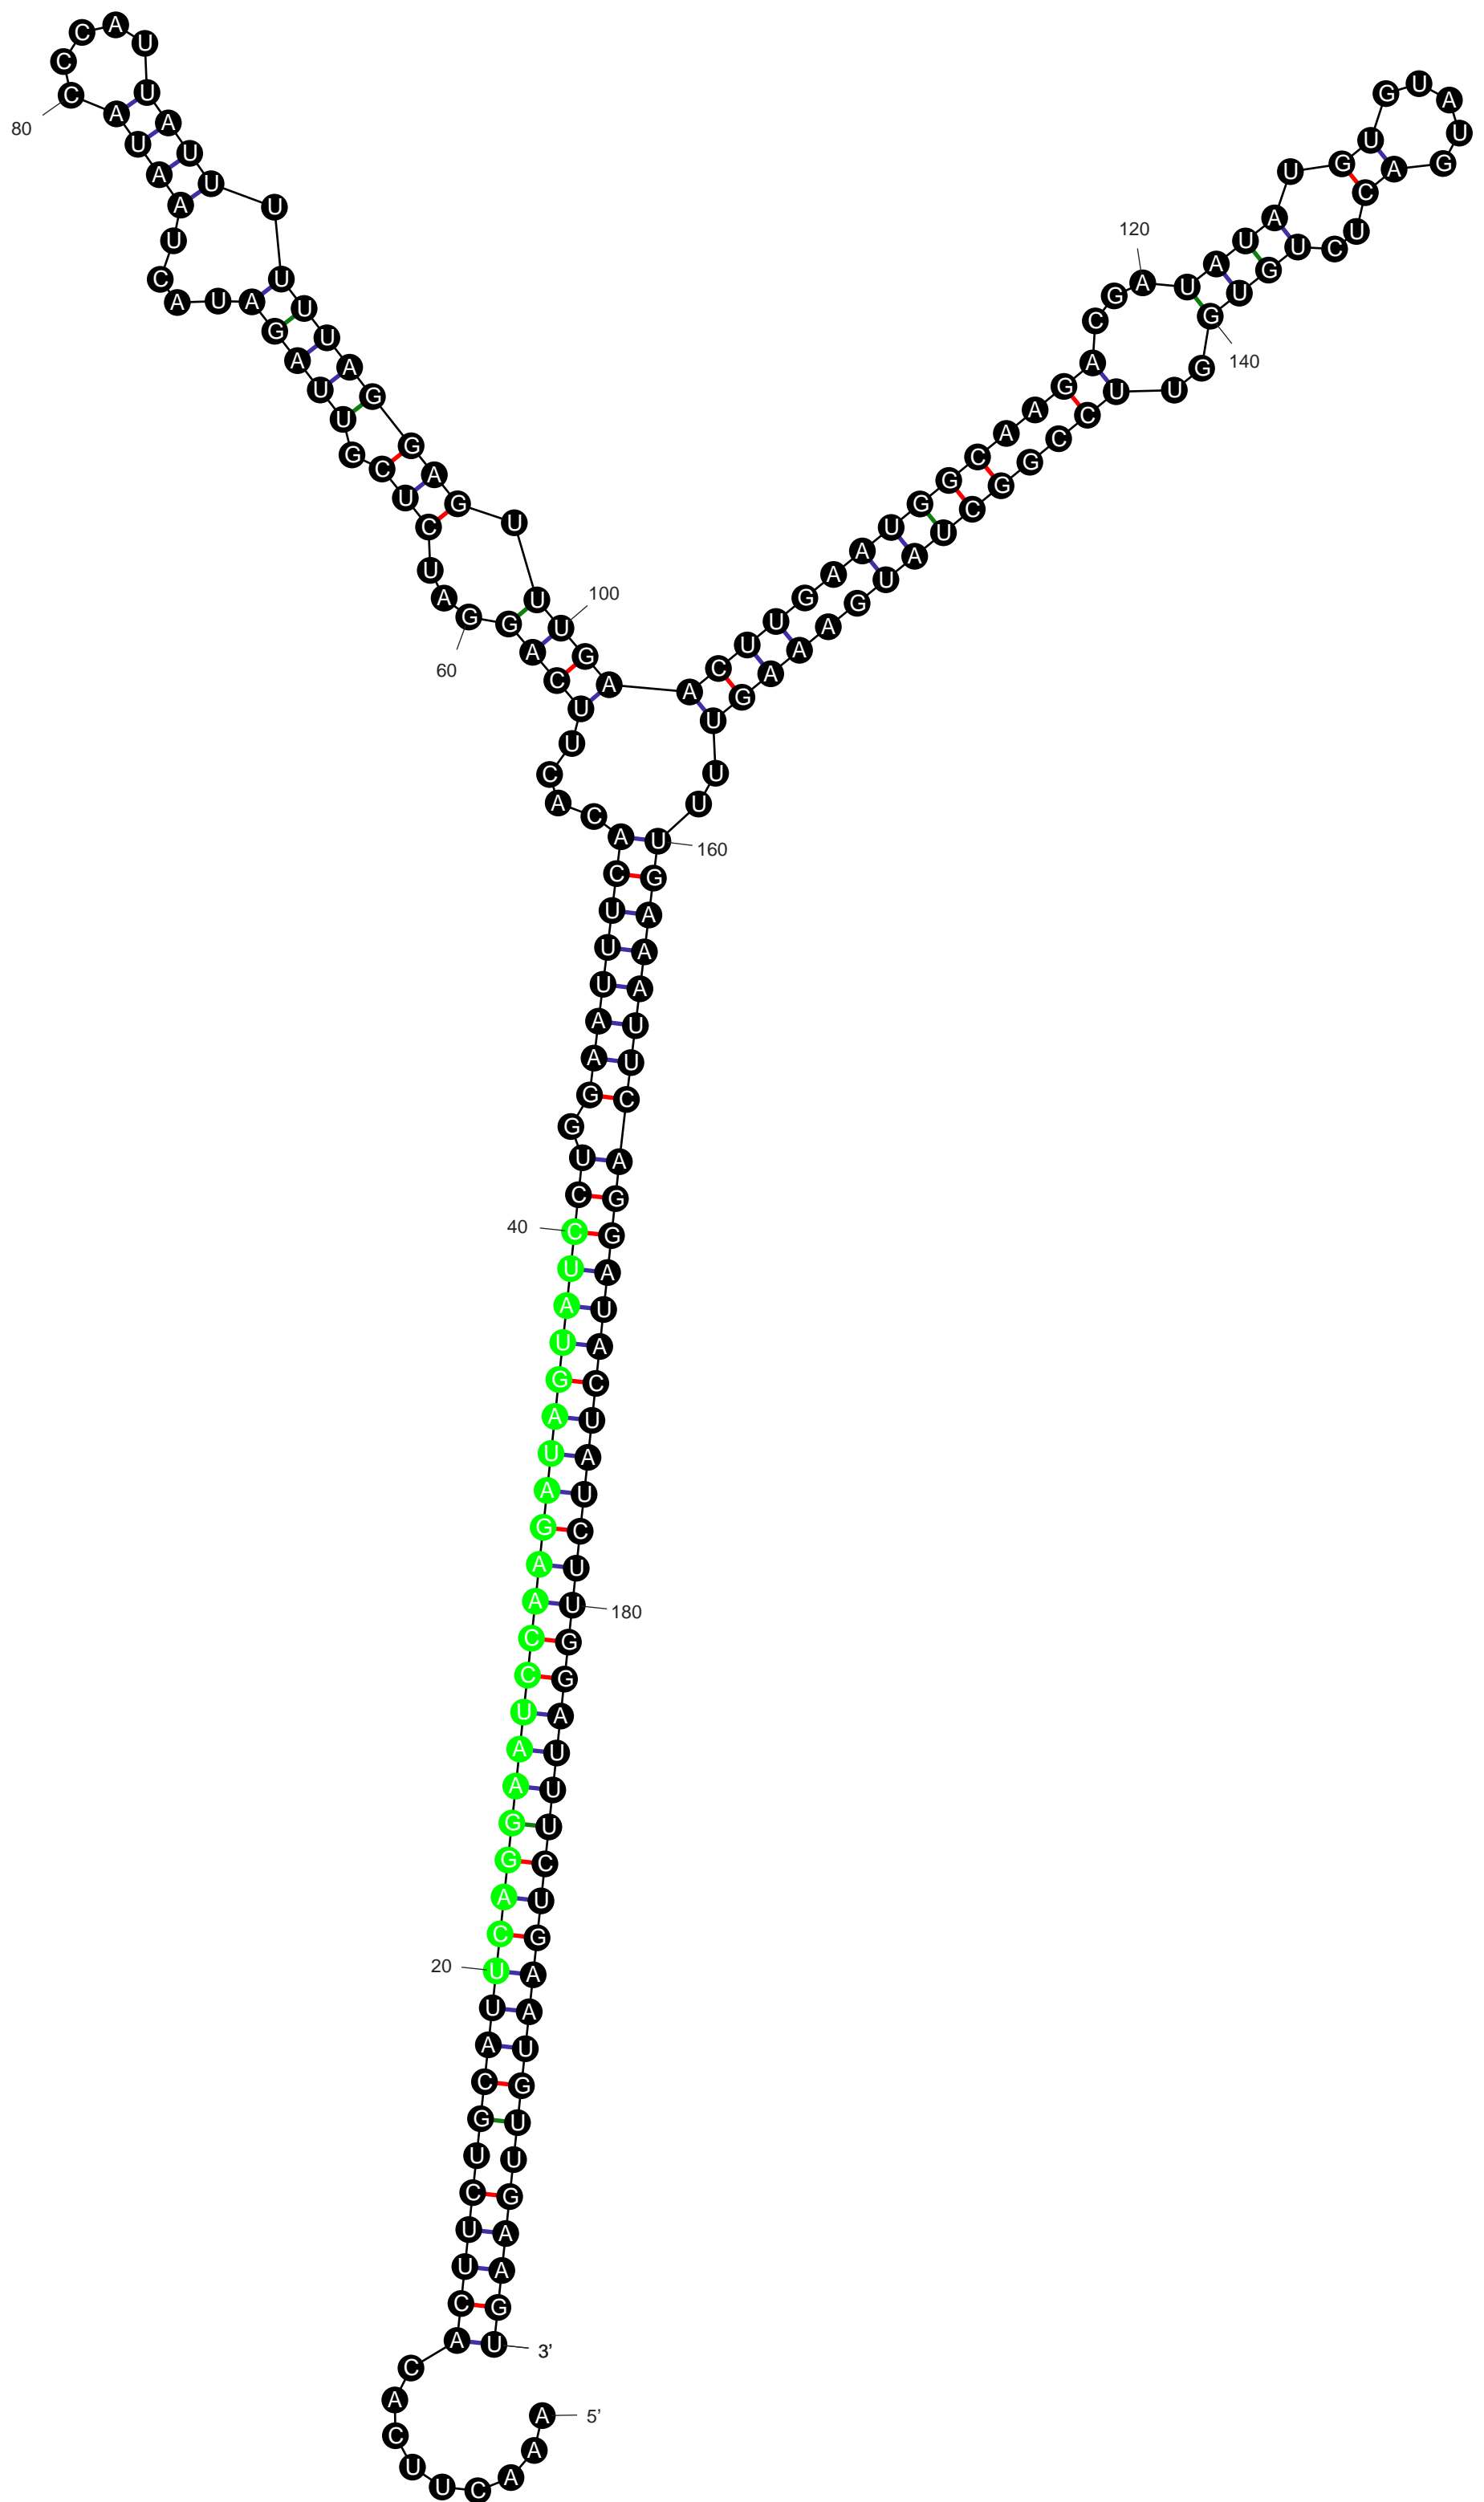

$dG = -66.30$  nta-miRn35



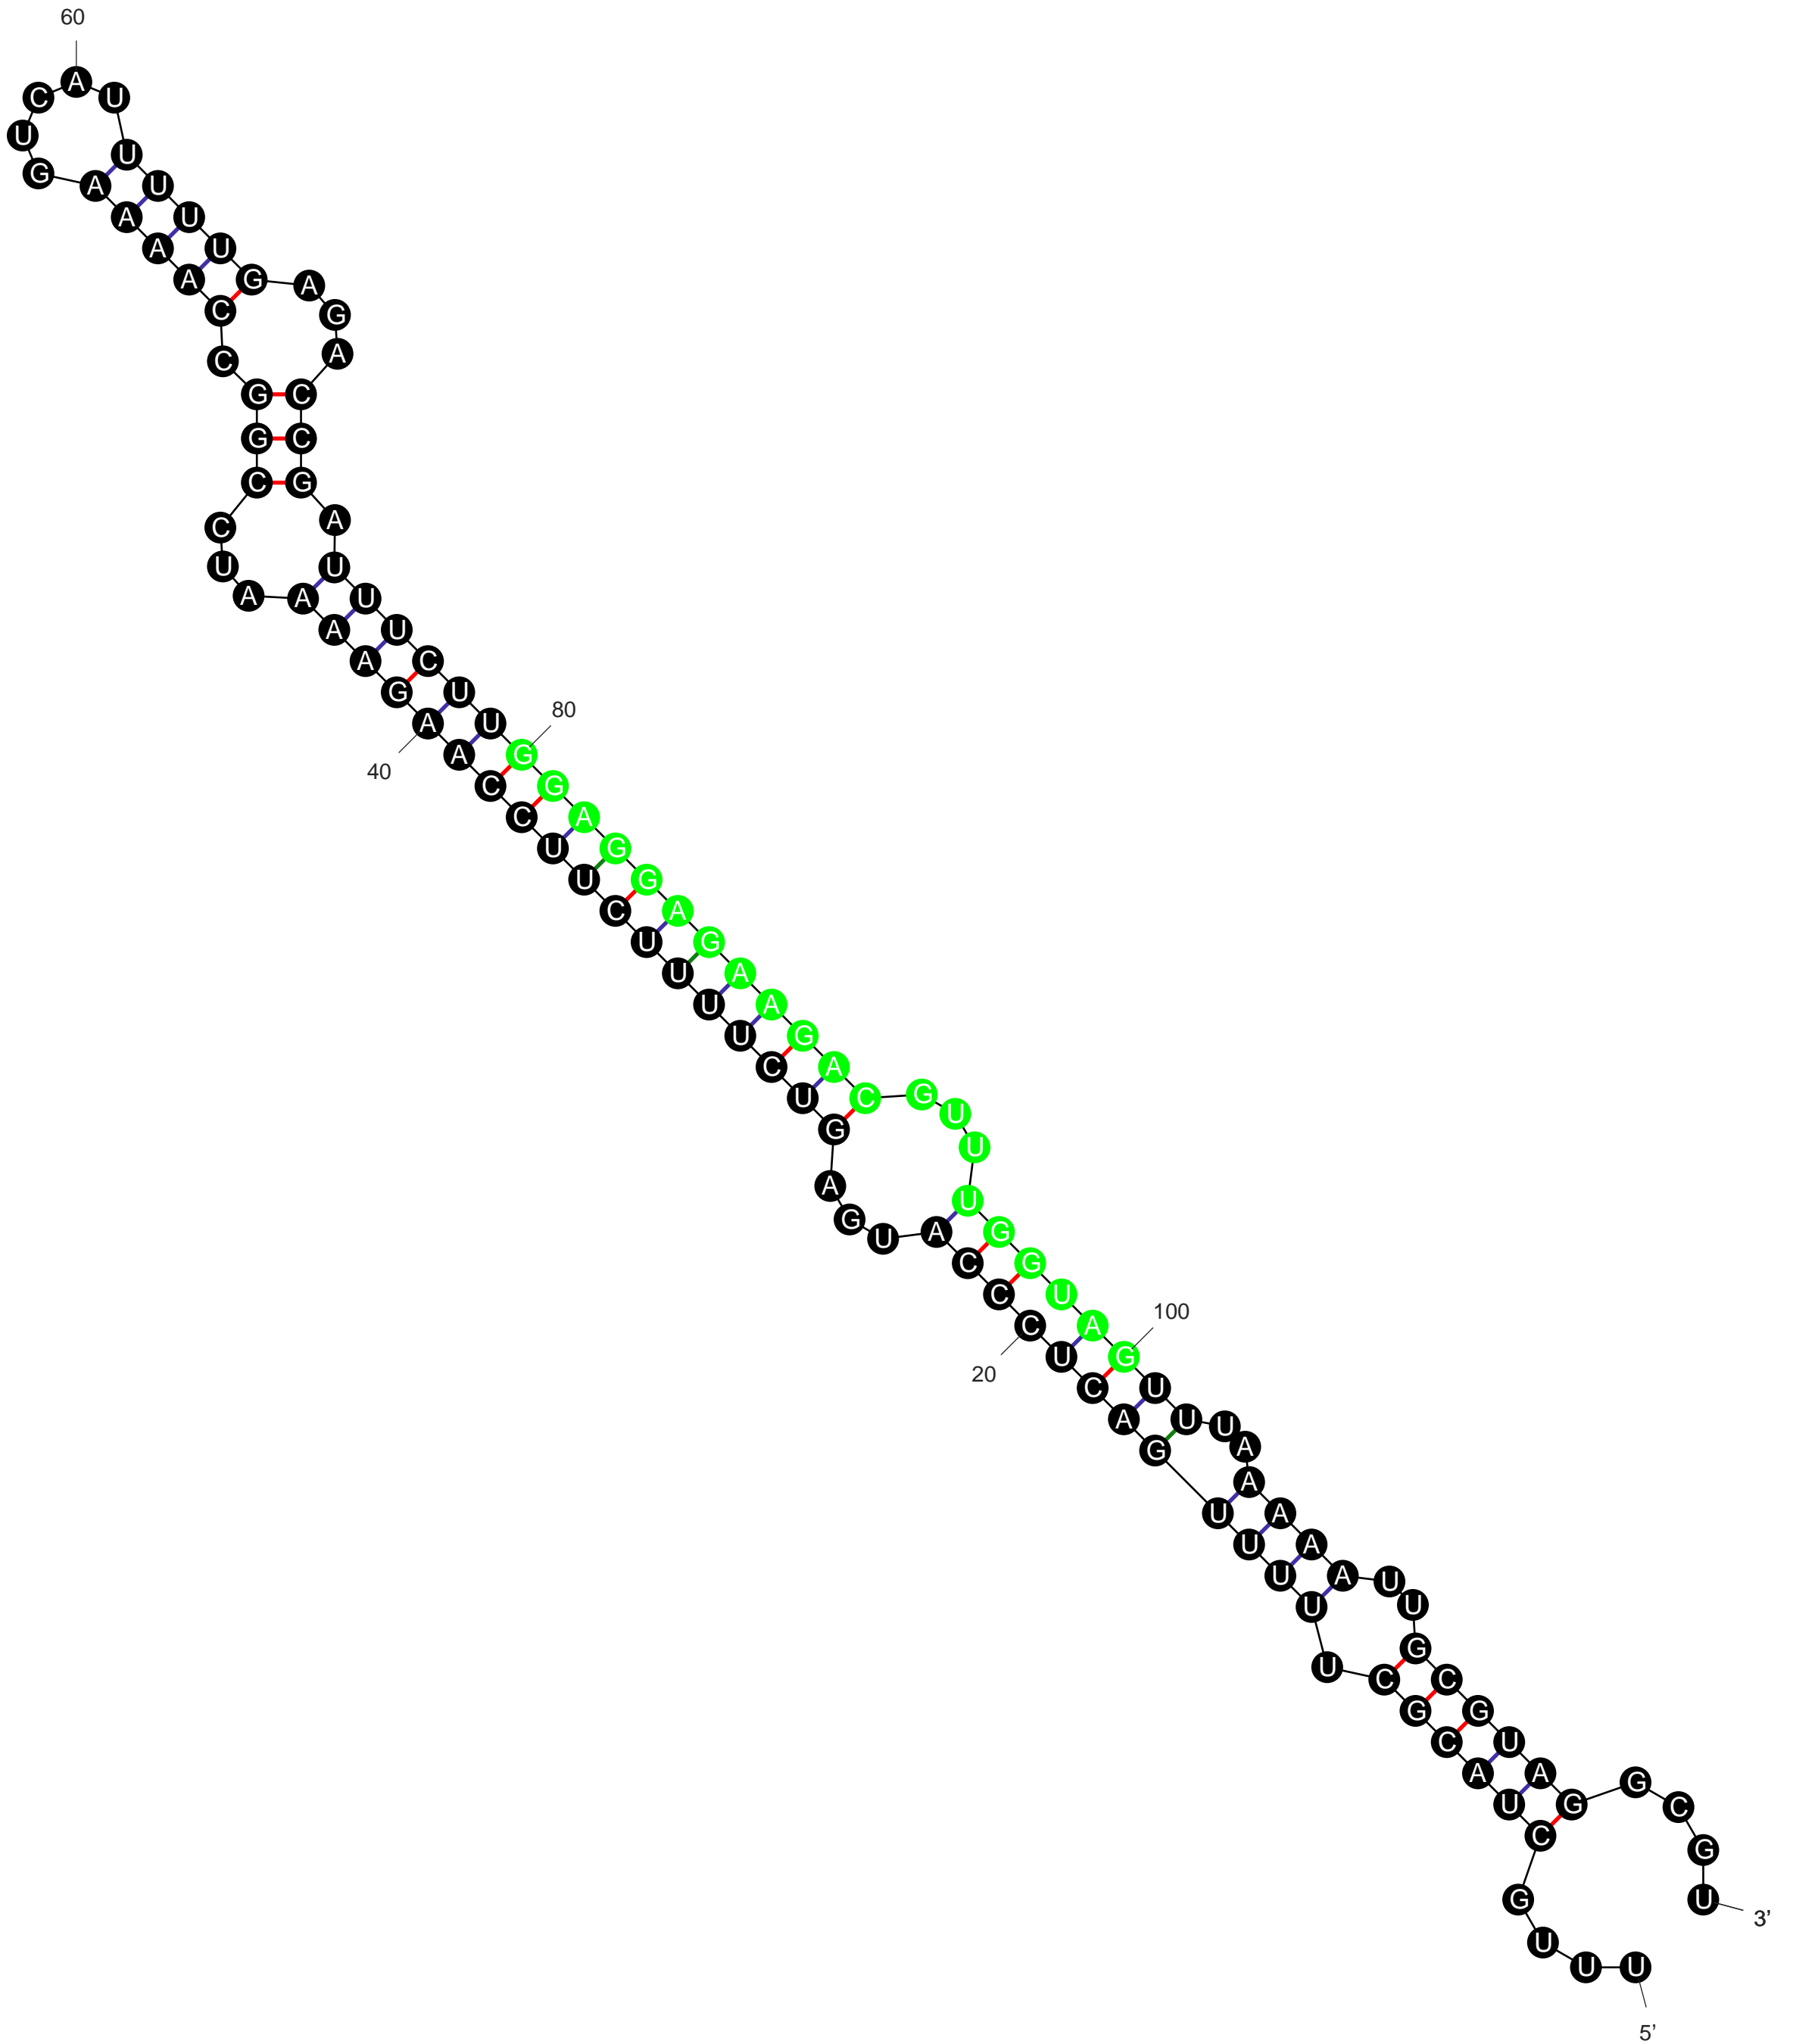

$dG = -45.80$  nta-miRn36

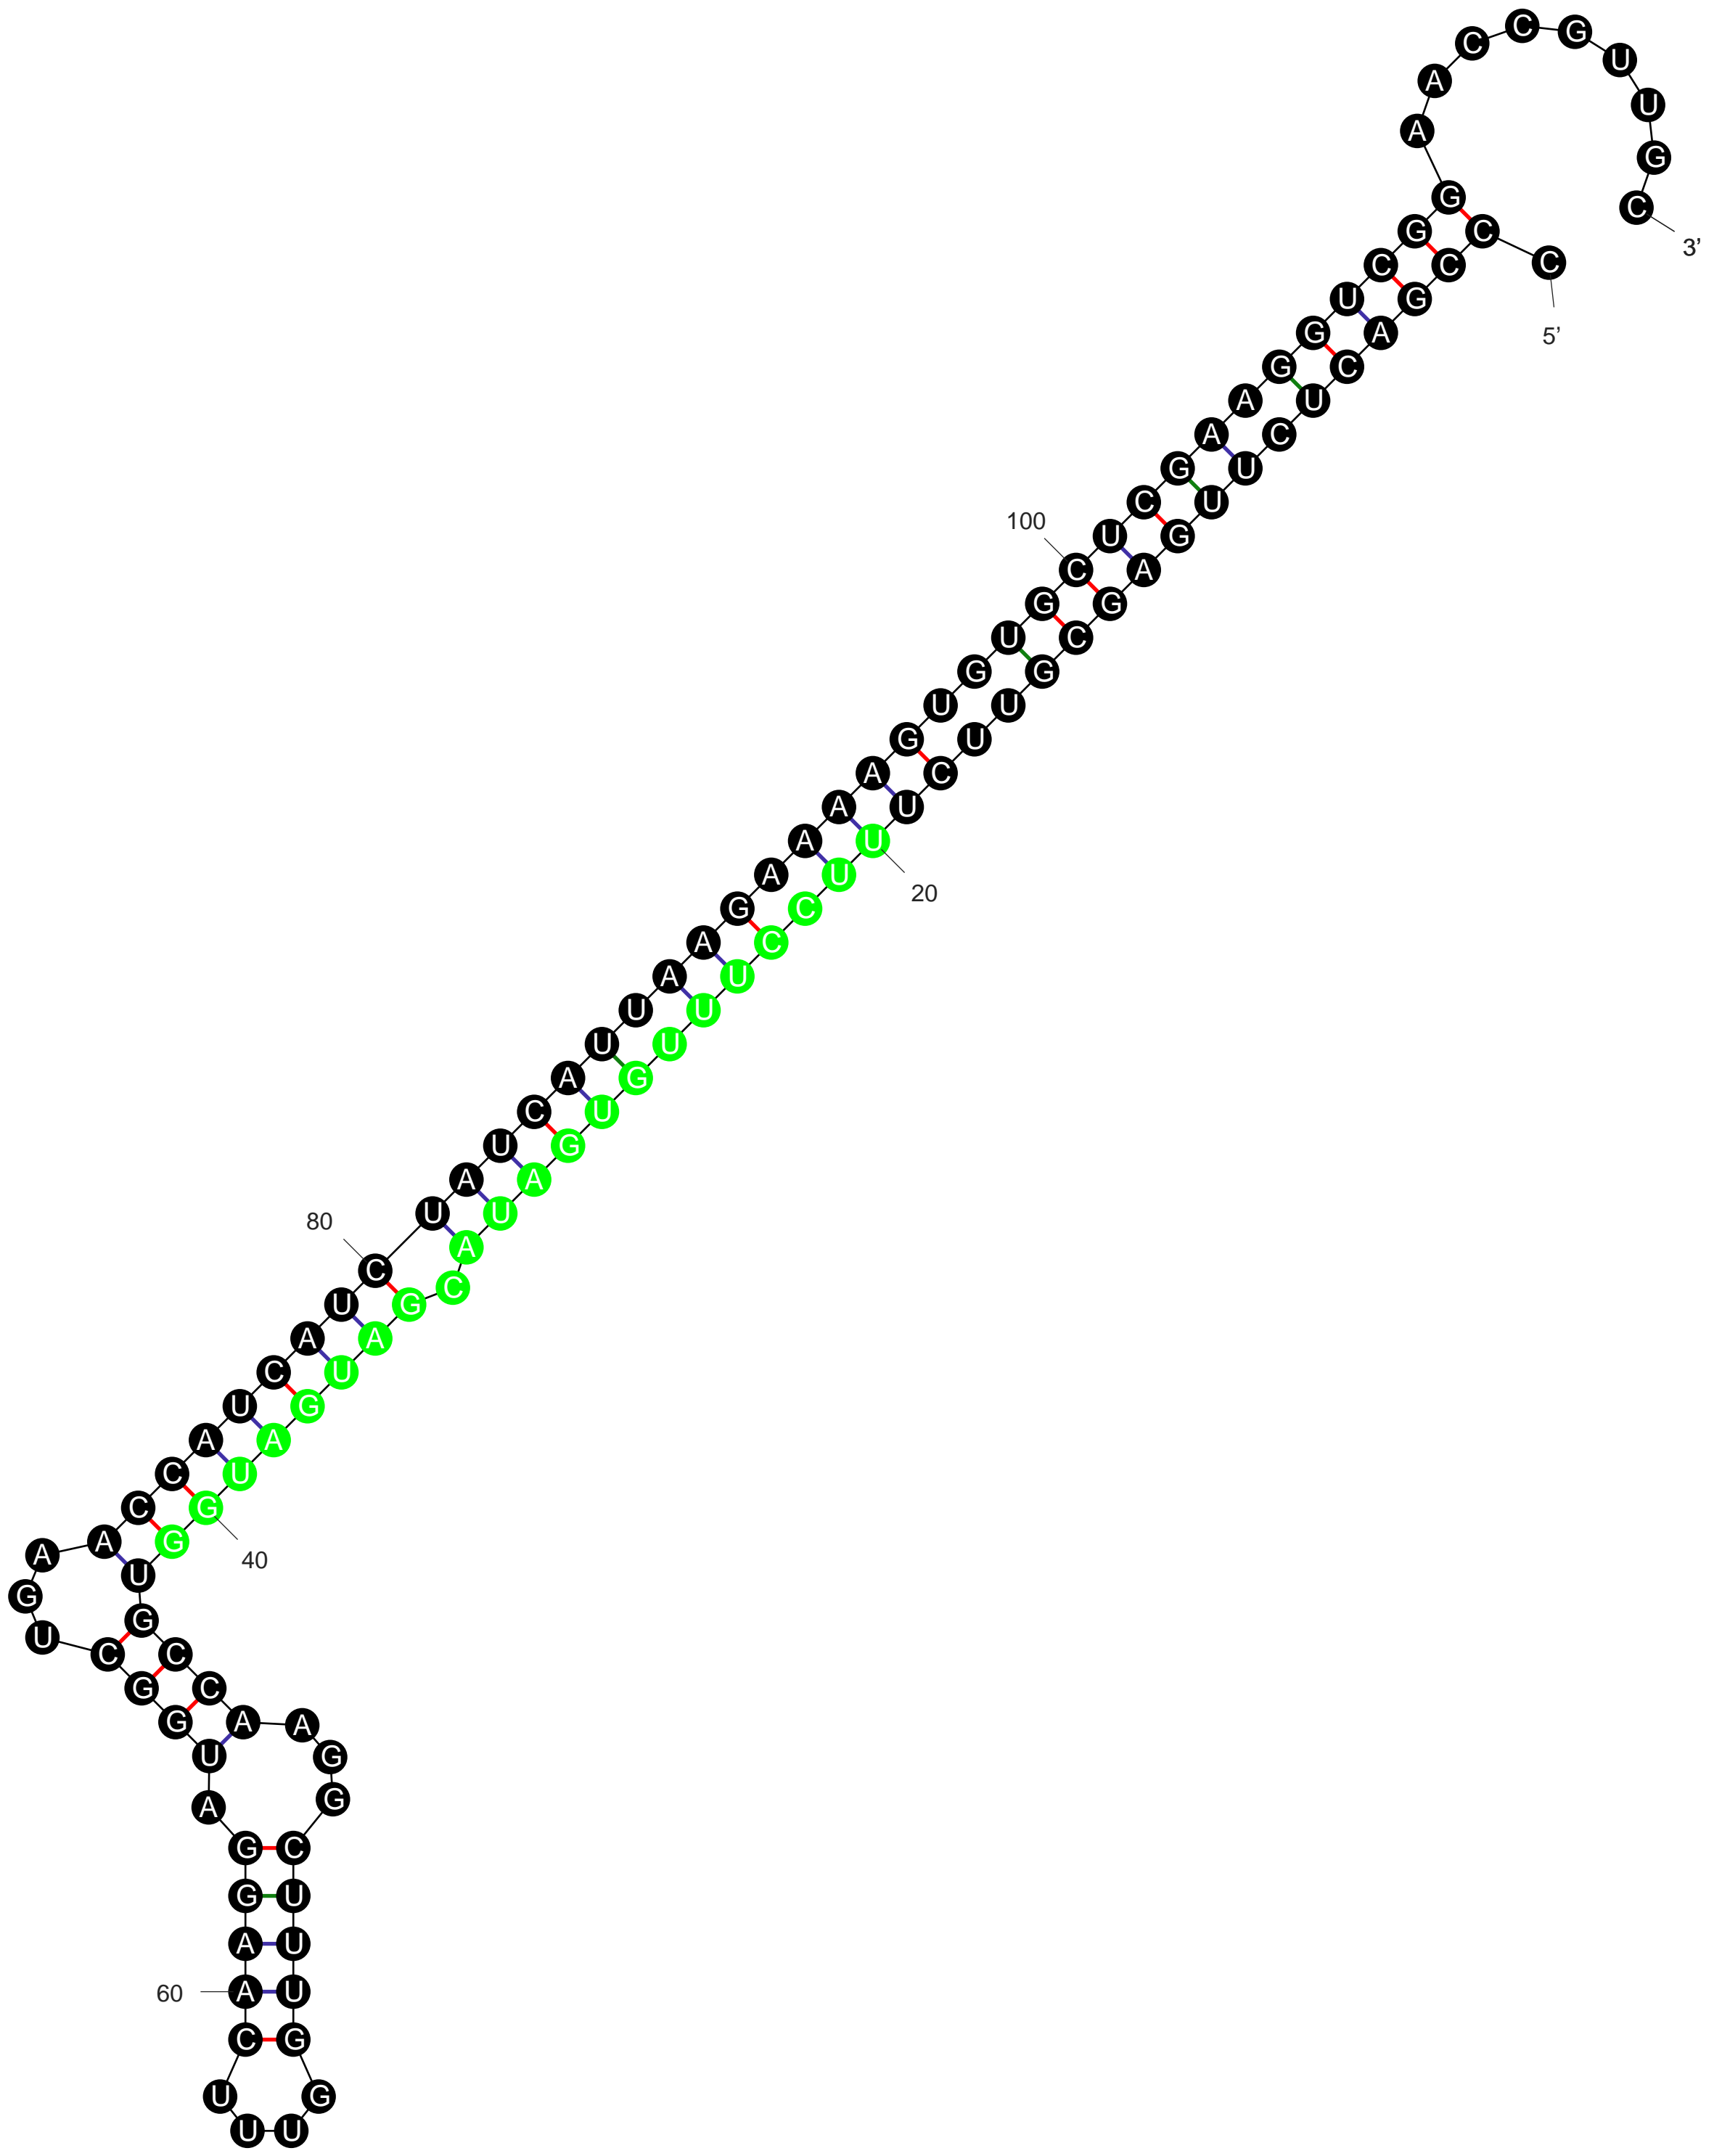

$dG = -50.00$  nta-miRn37

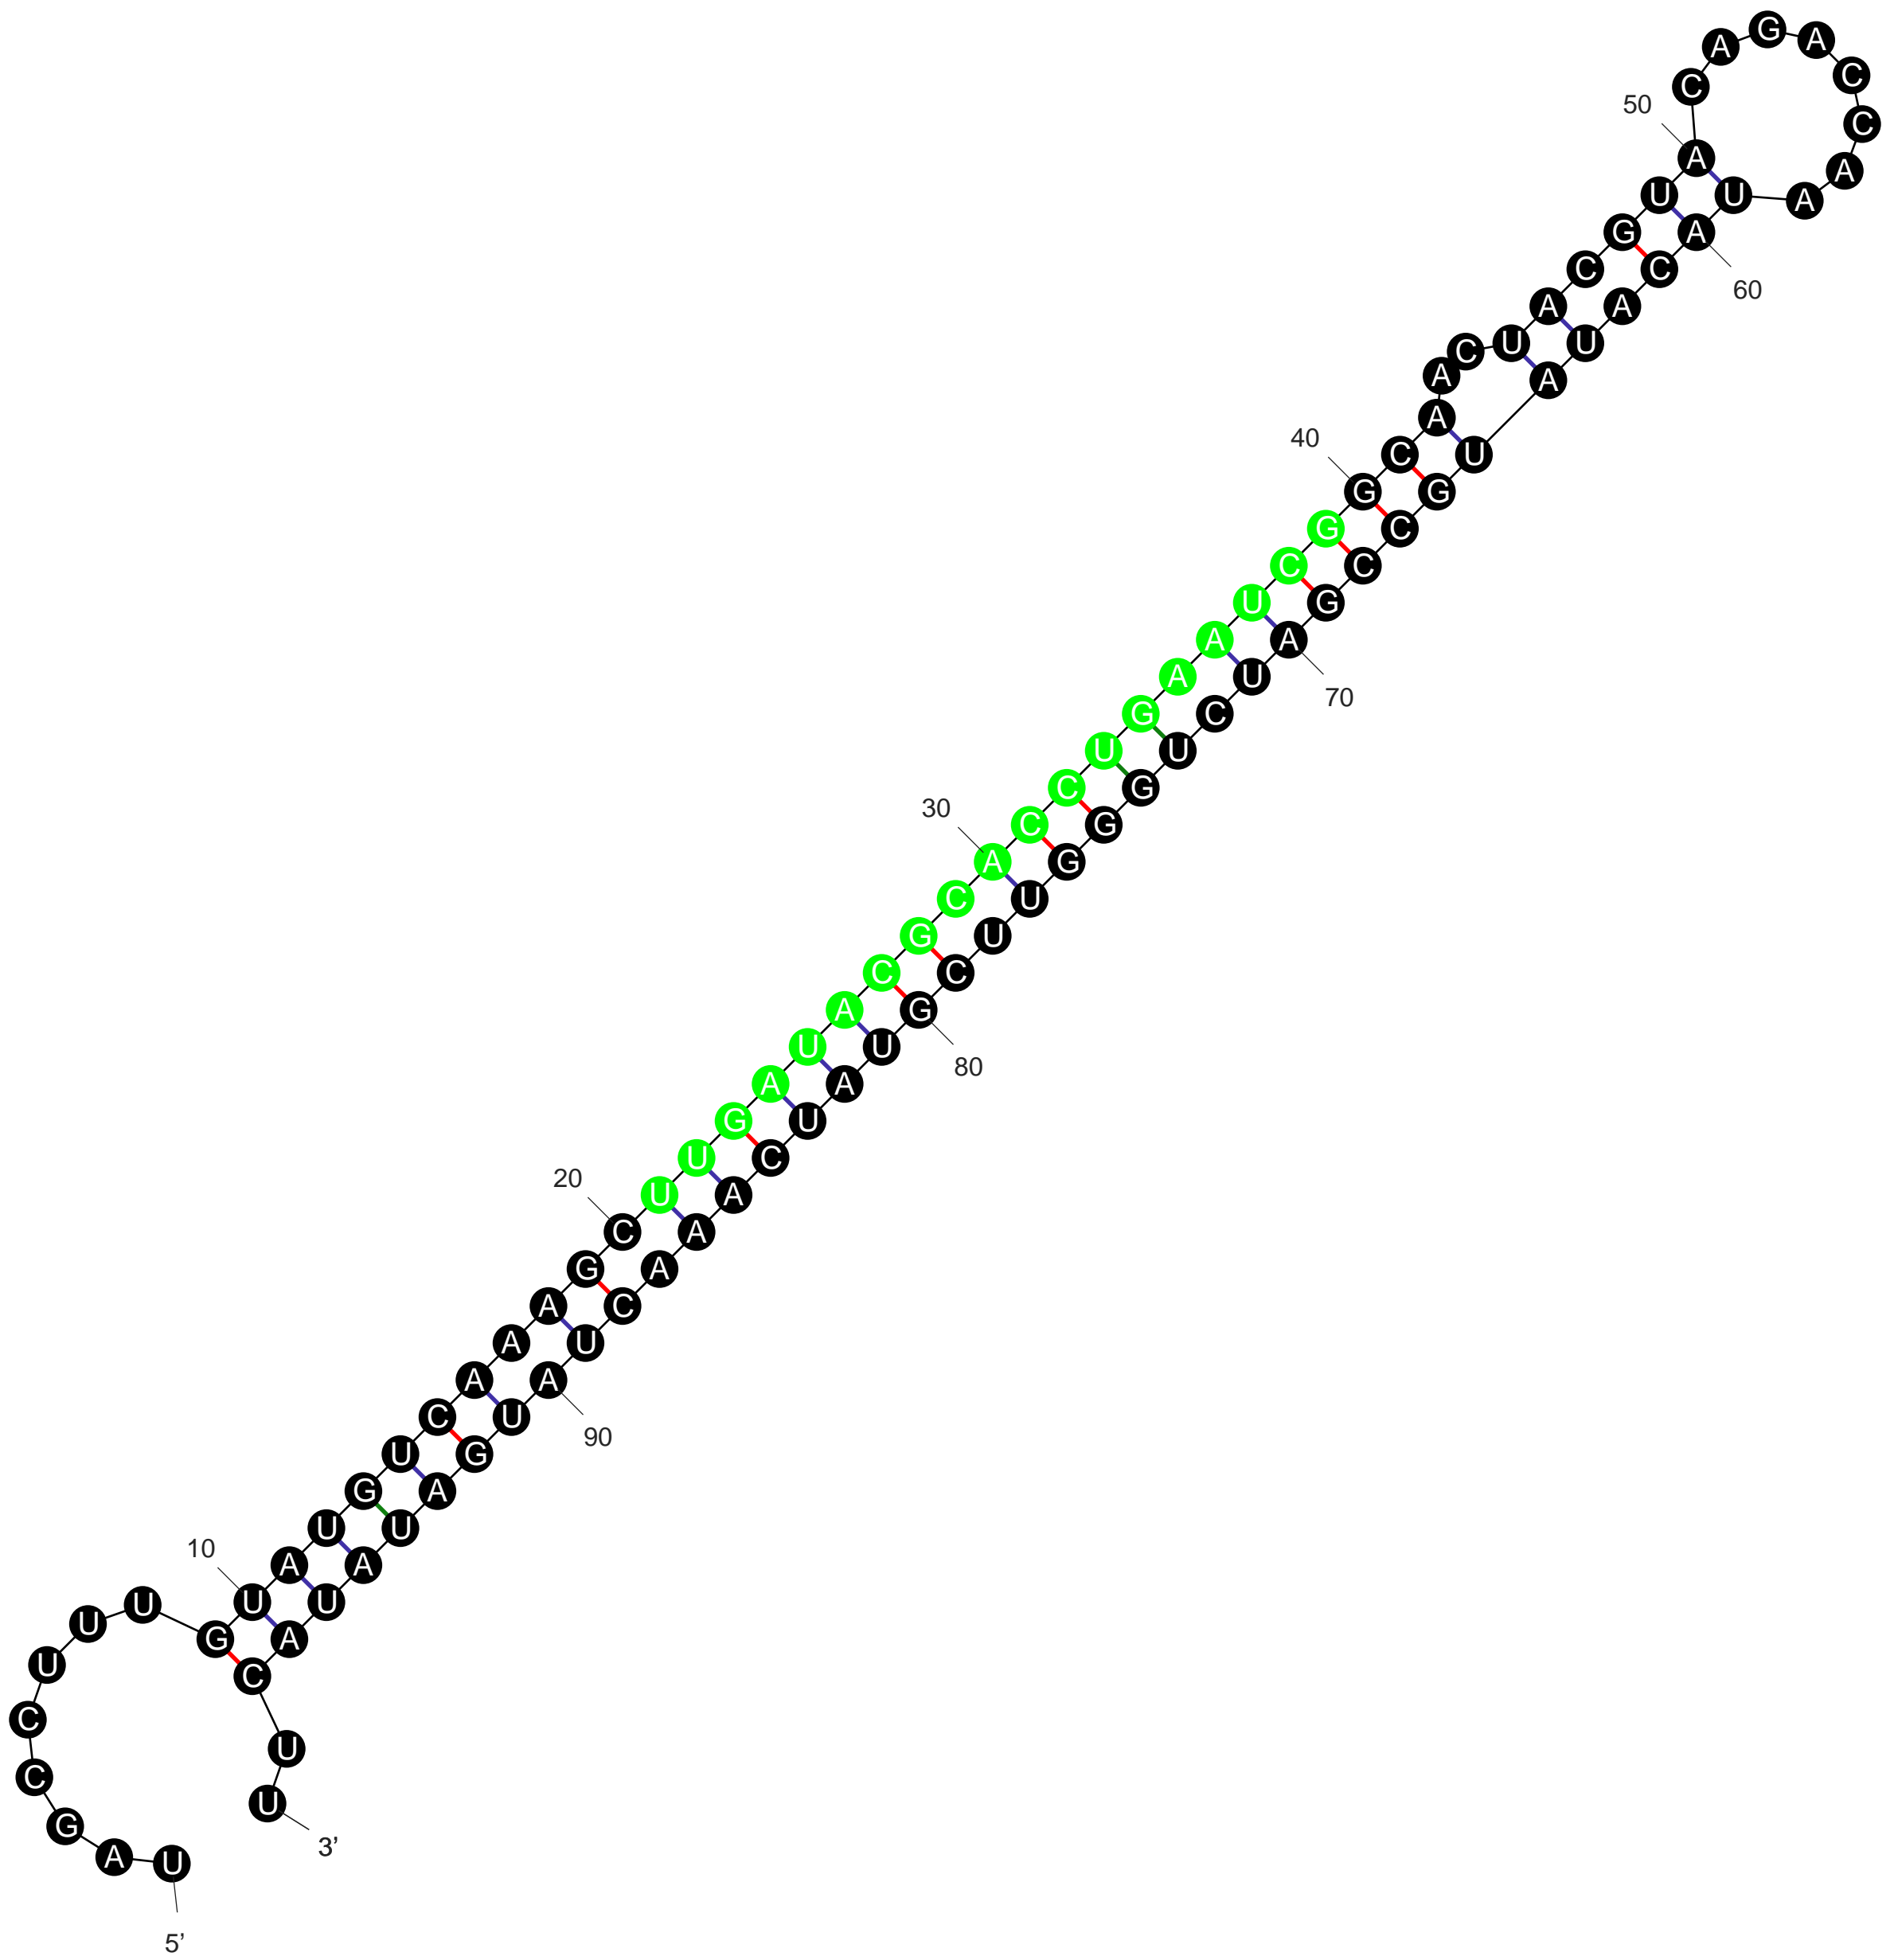

$dG = -37.20$  nta-miRn38

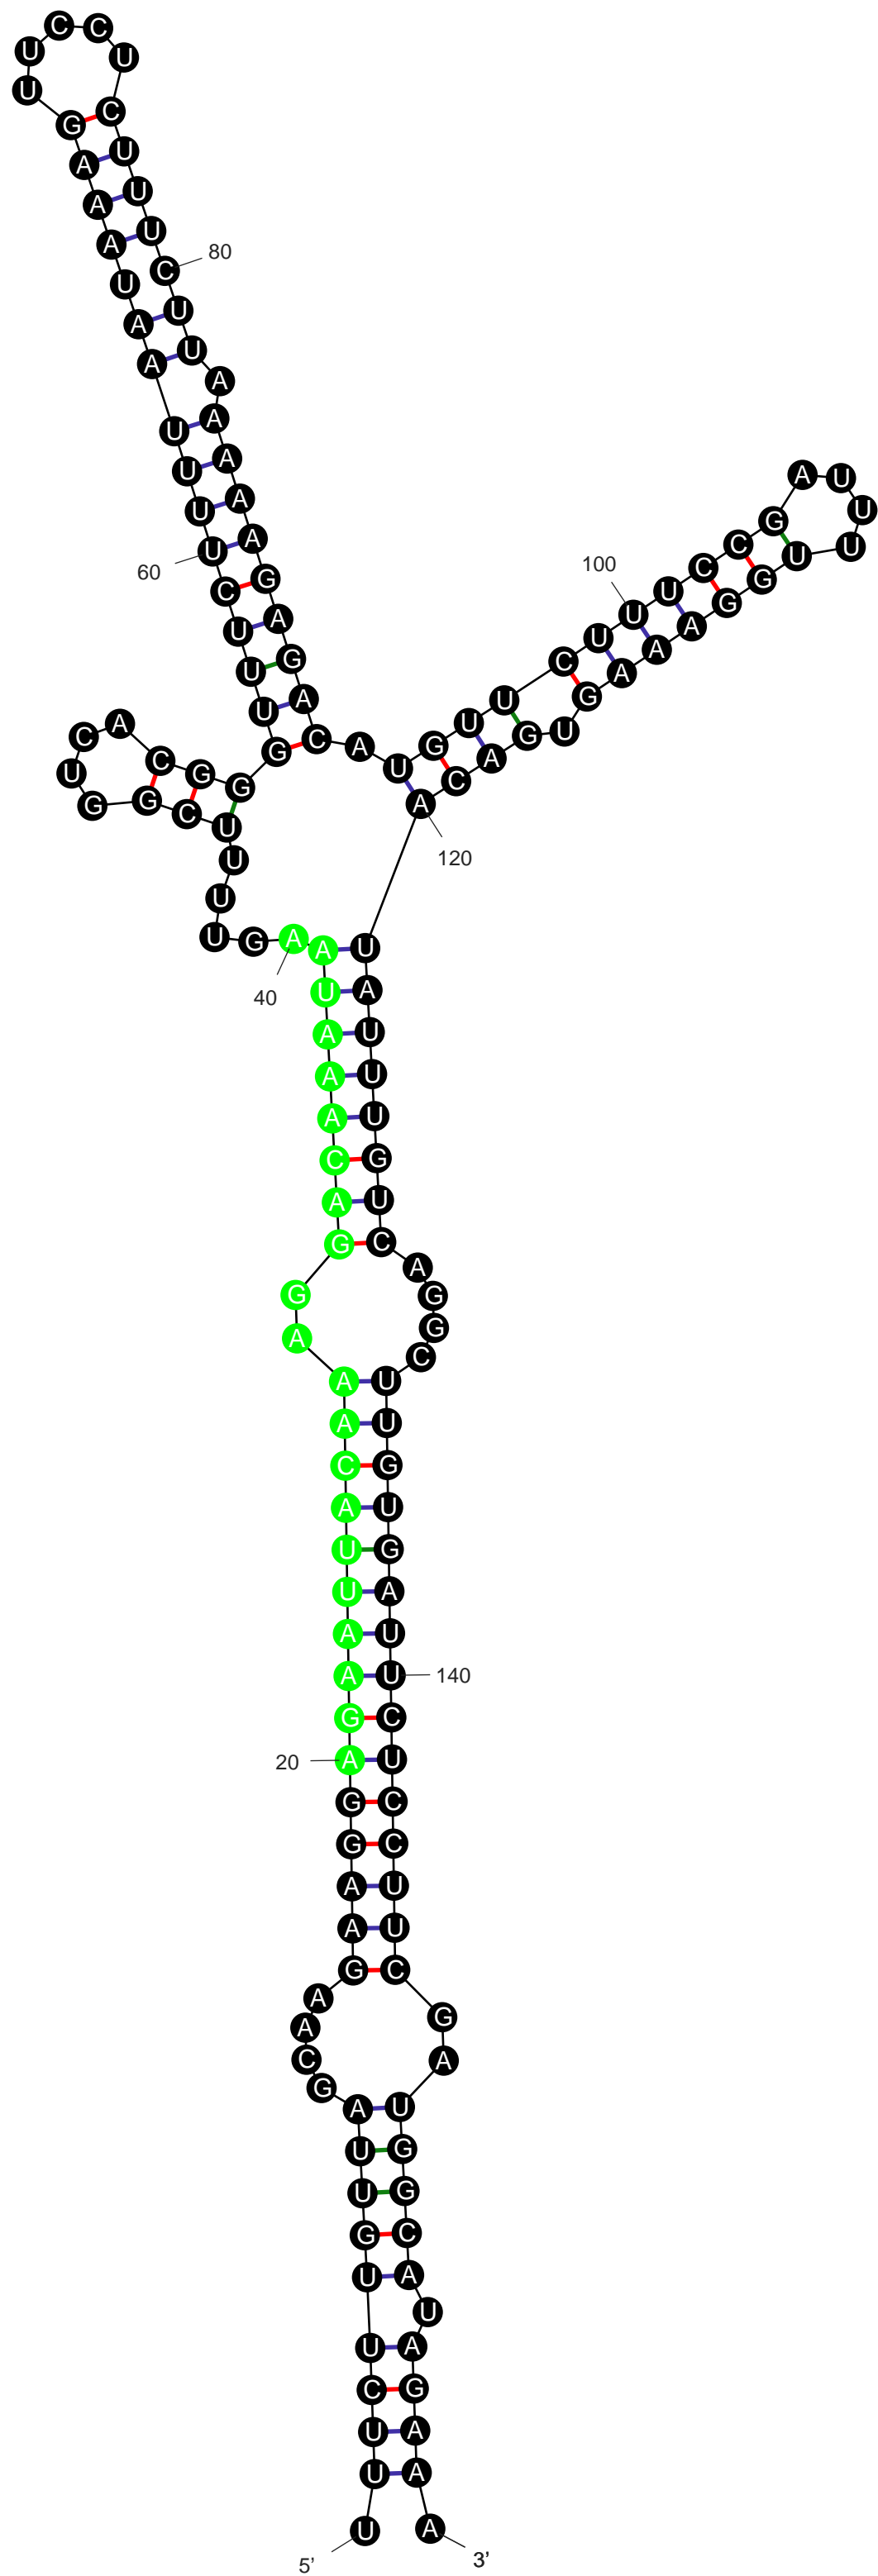

$dG = -50.70$  nta-miRn39

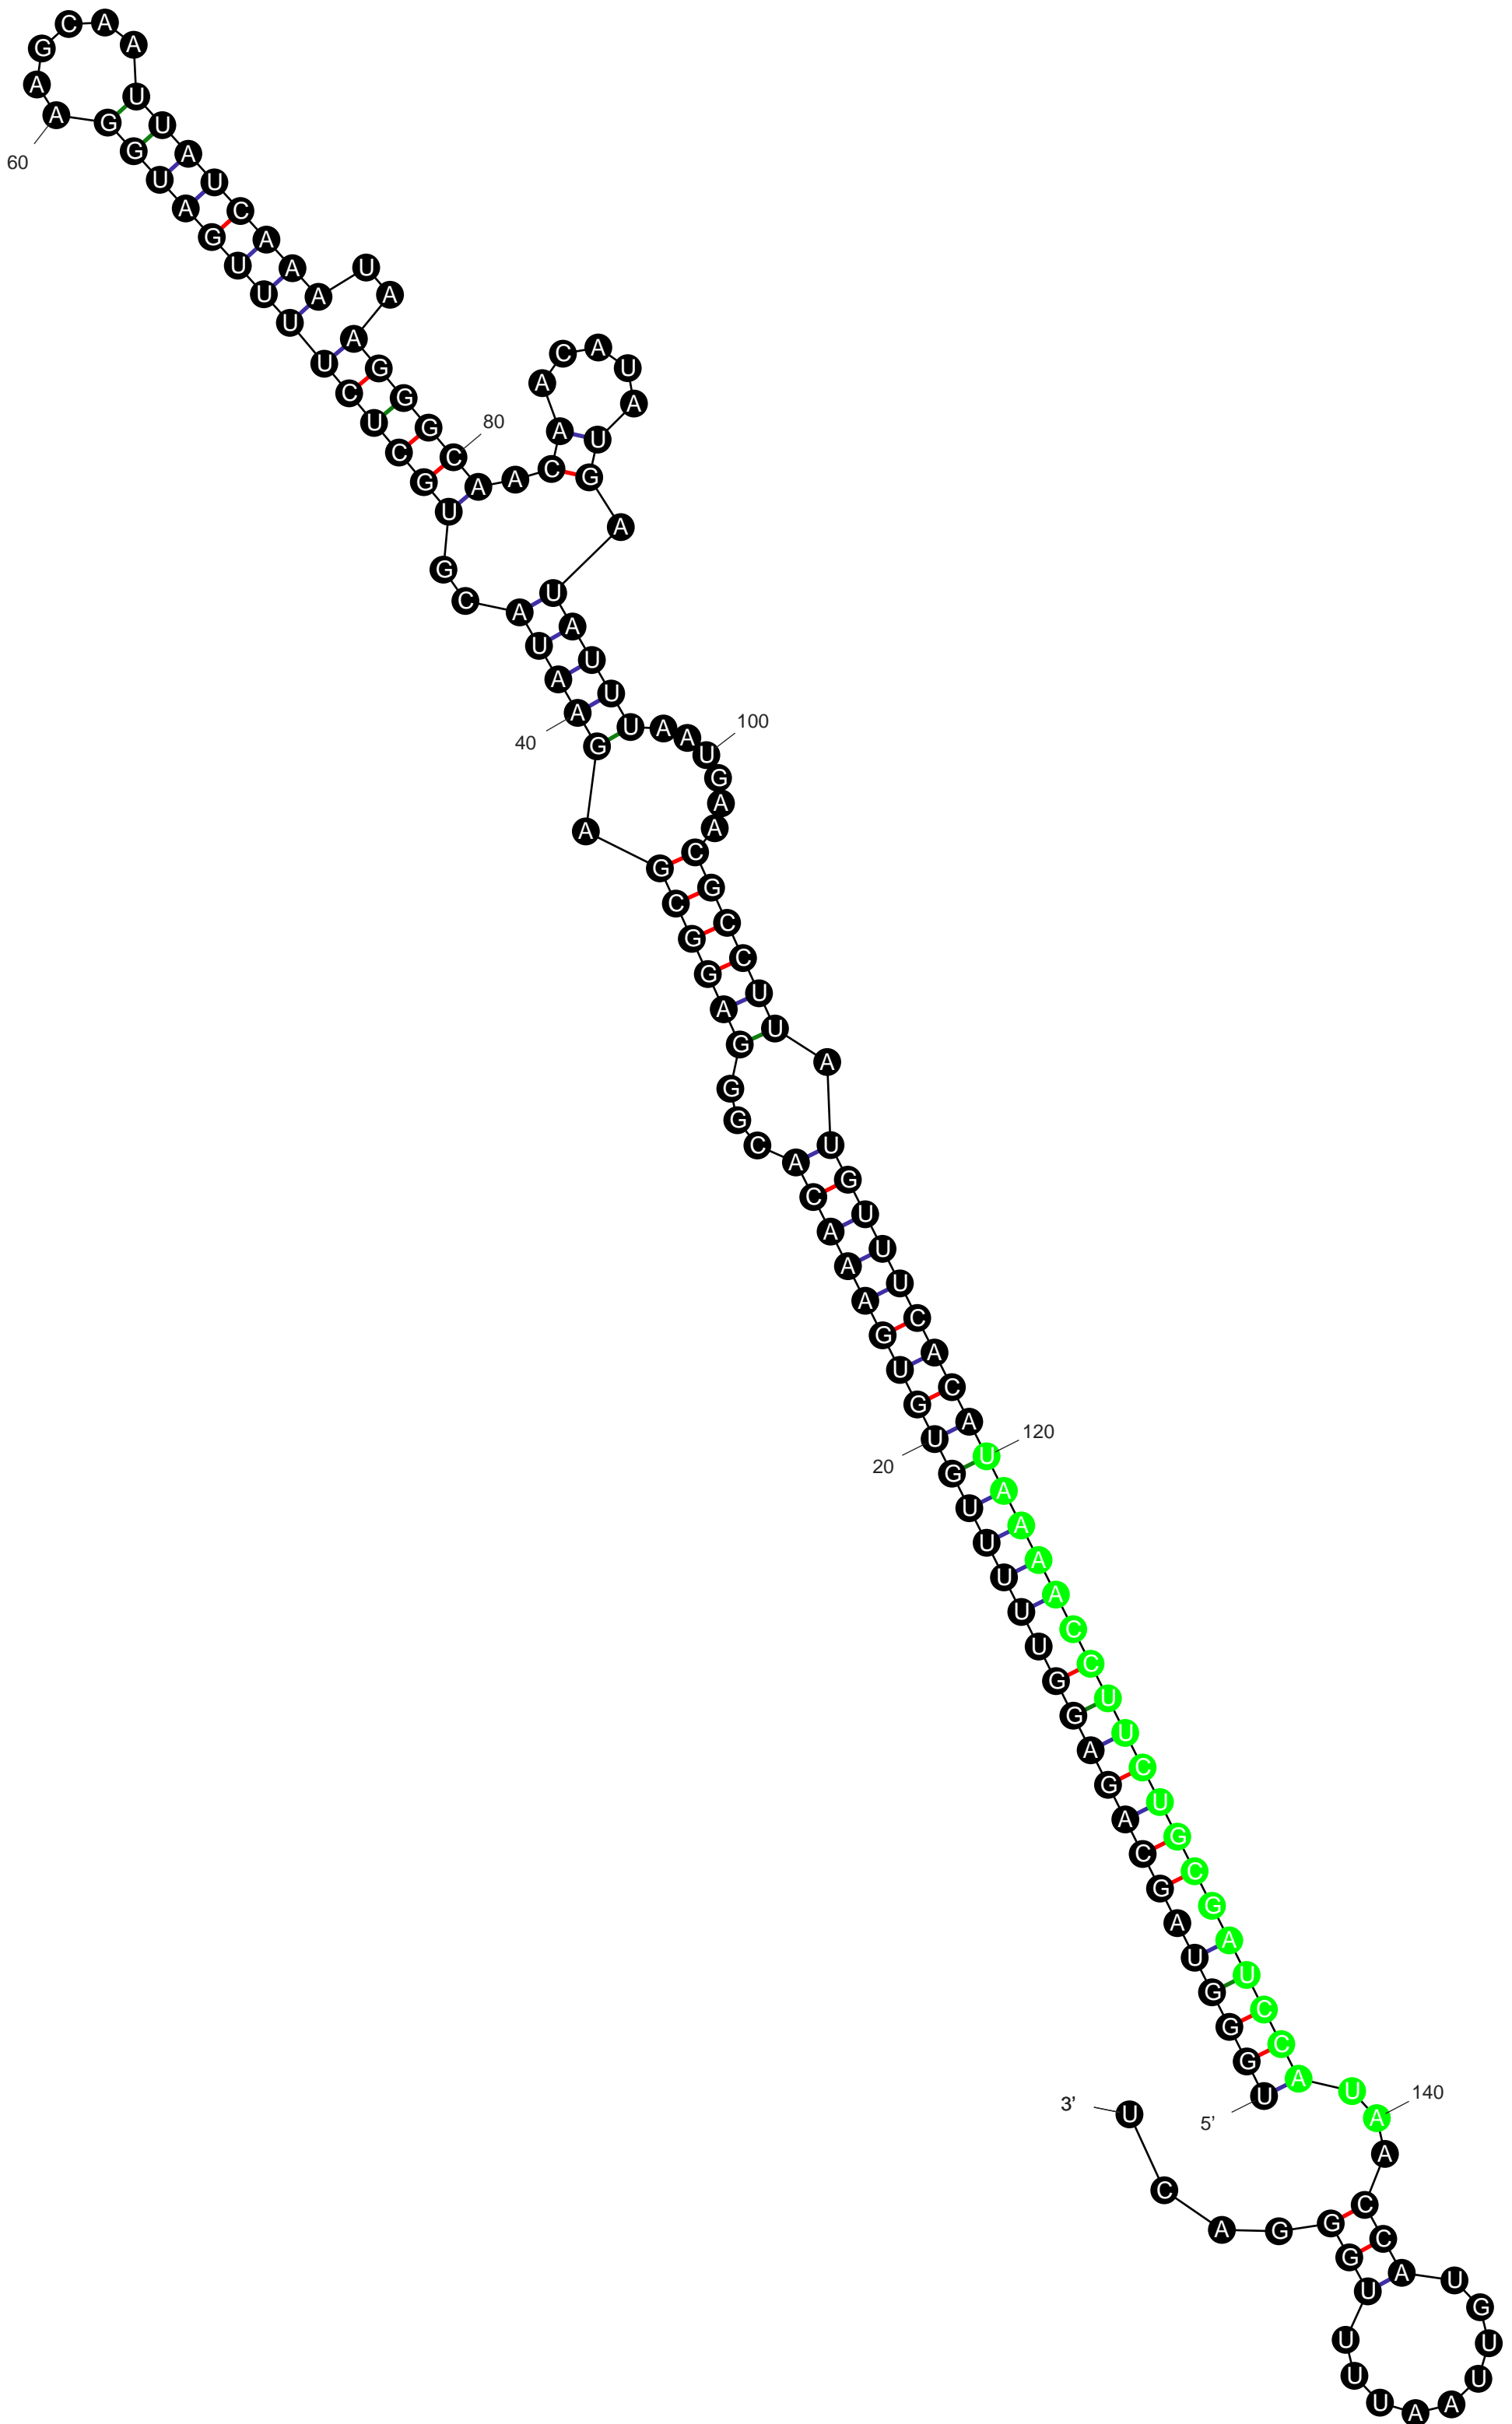

$dG = -51.40$  nta-miRn40

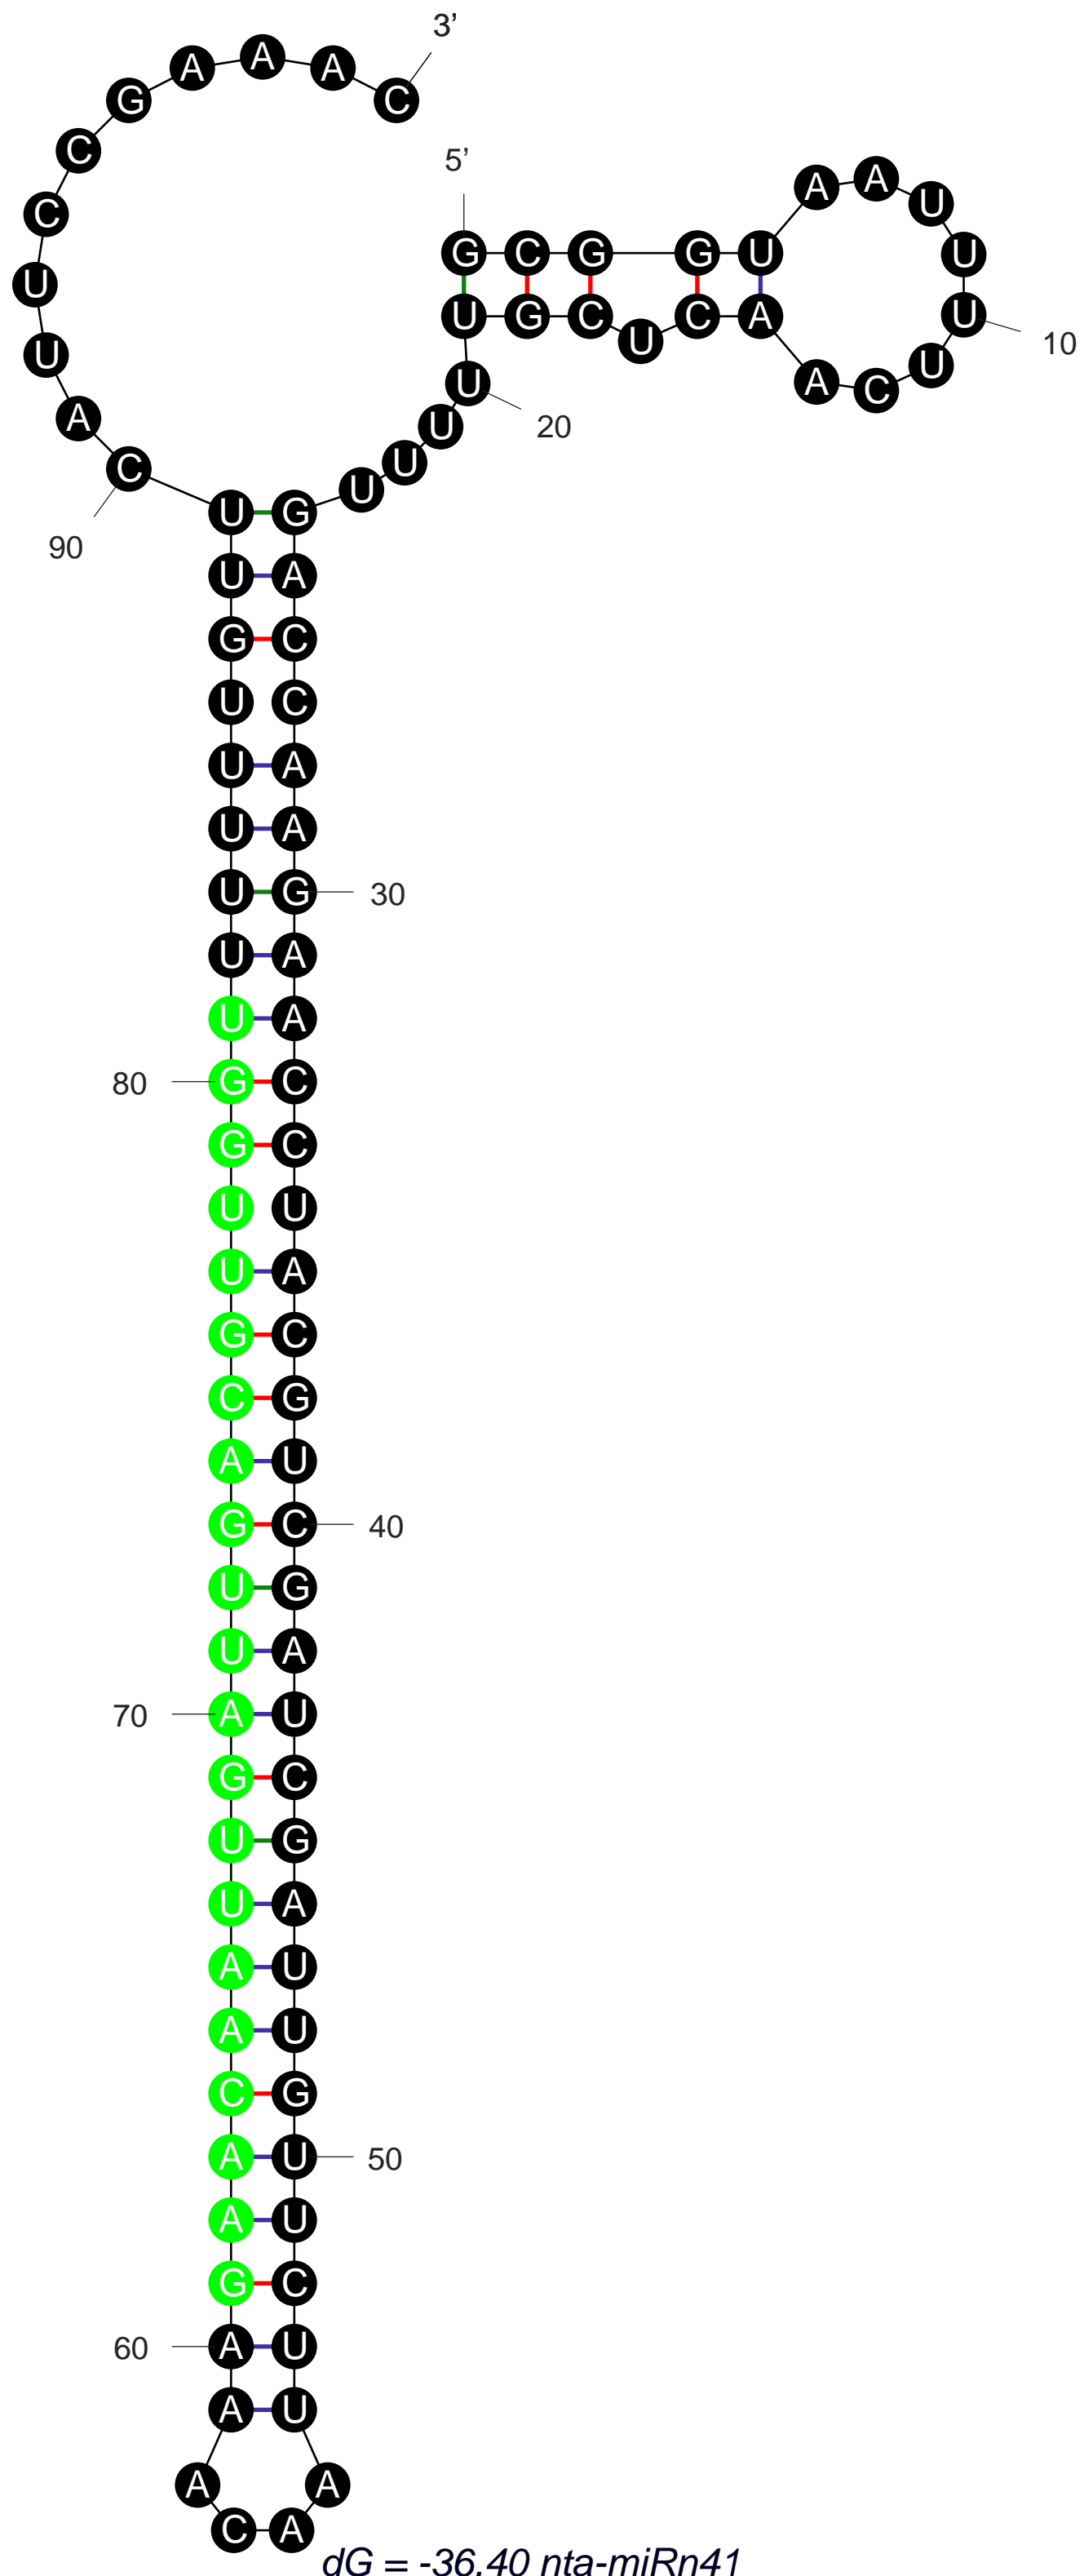



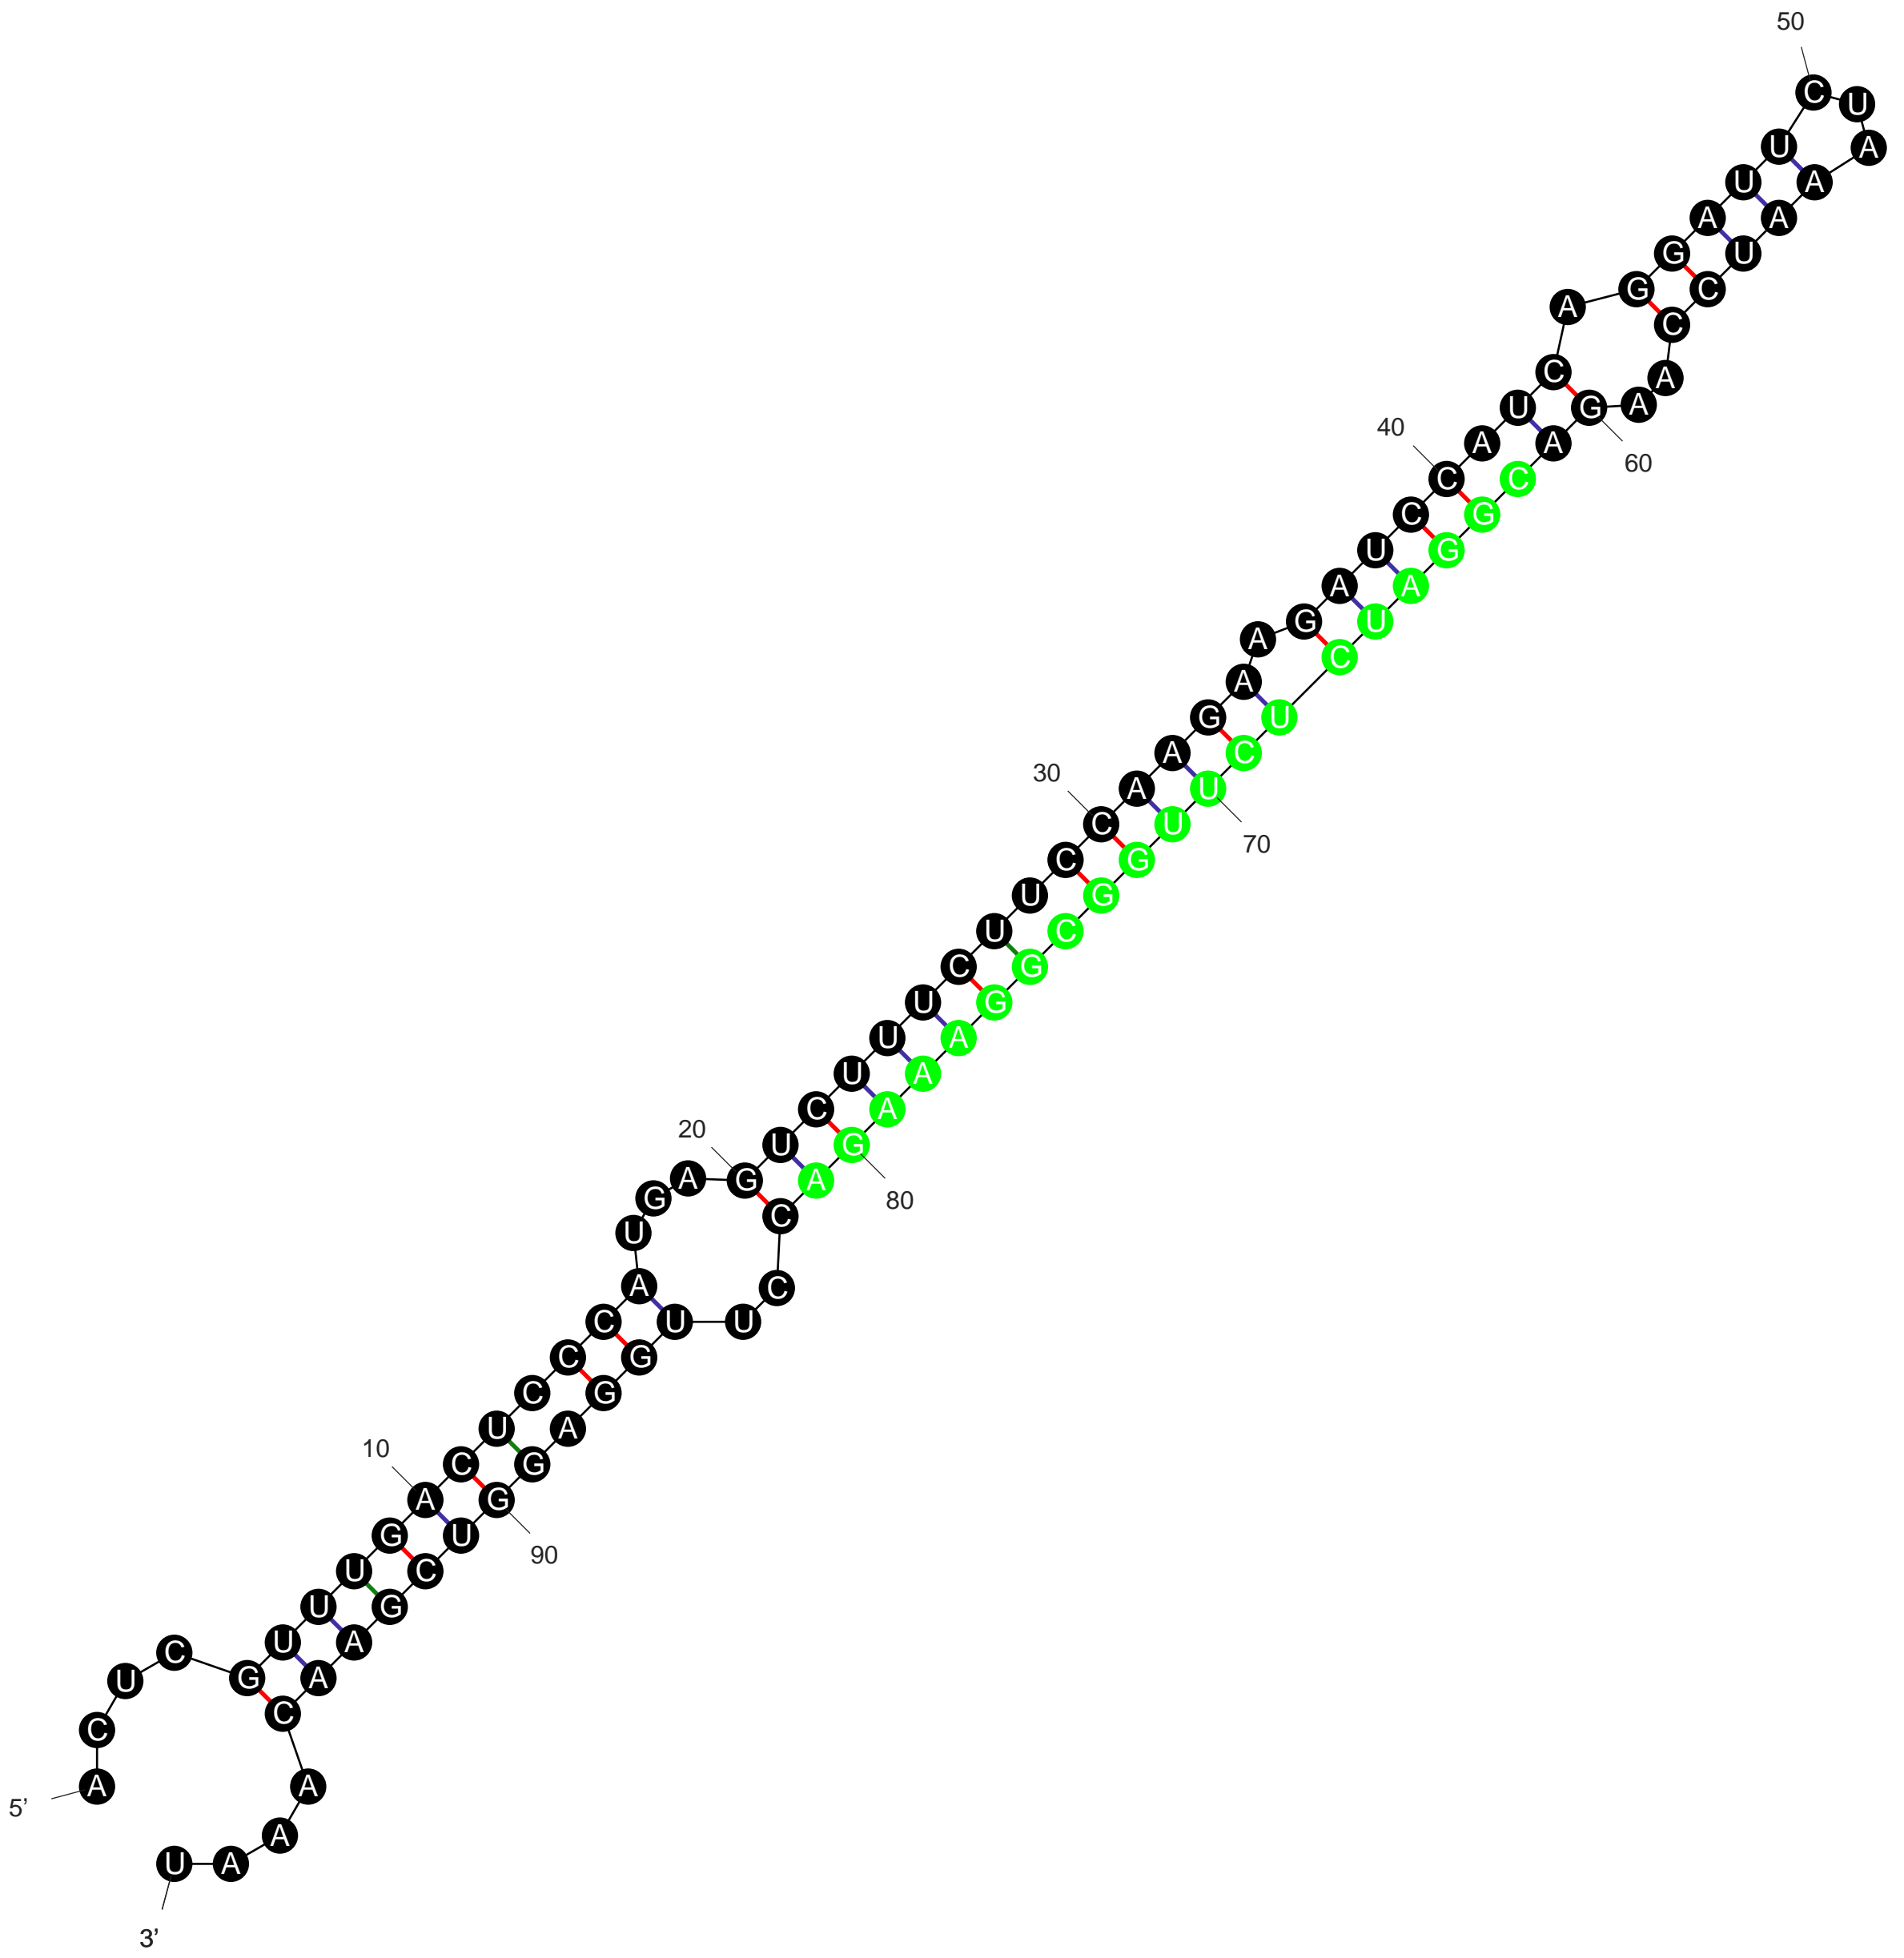

$dG = -44.50$  nta-miRn43



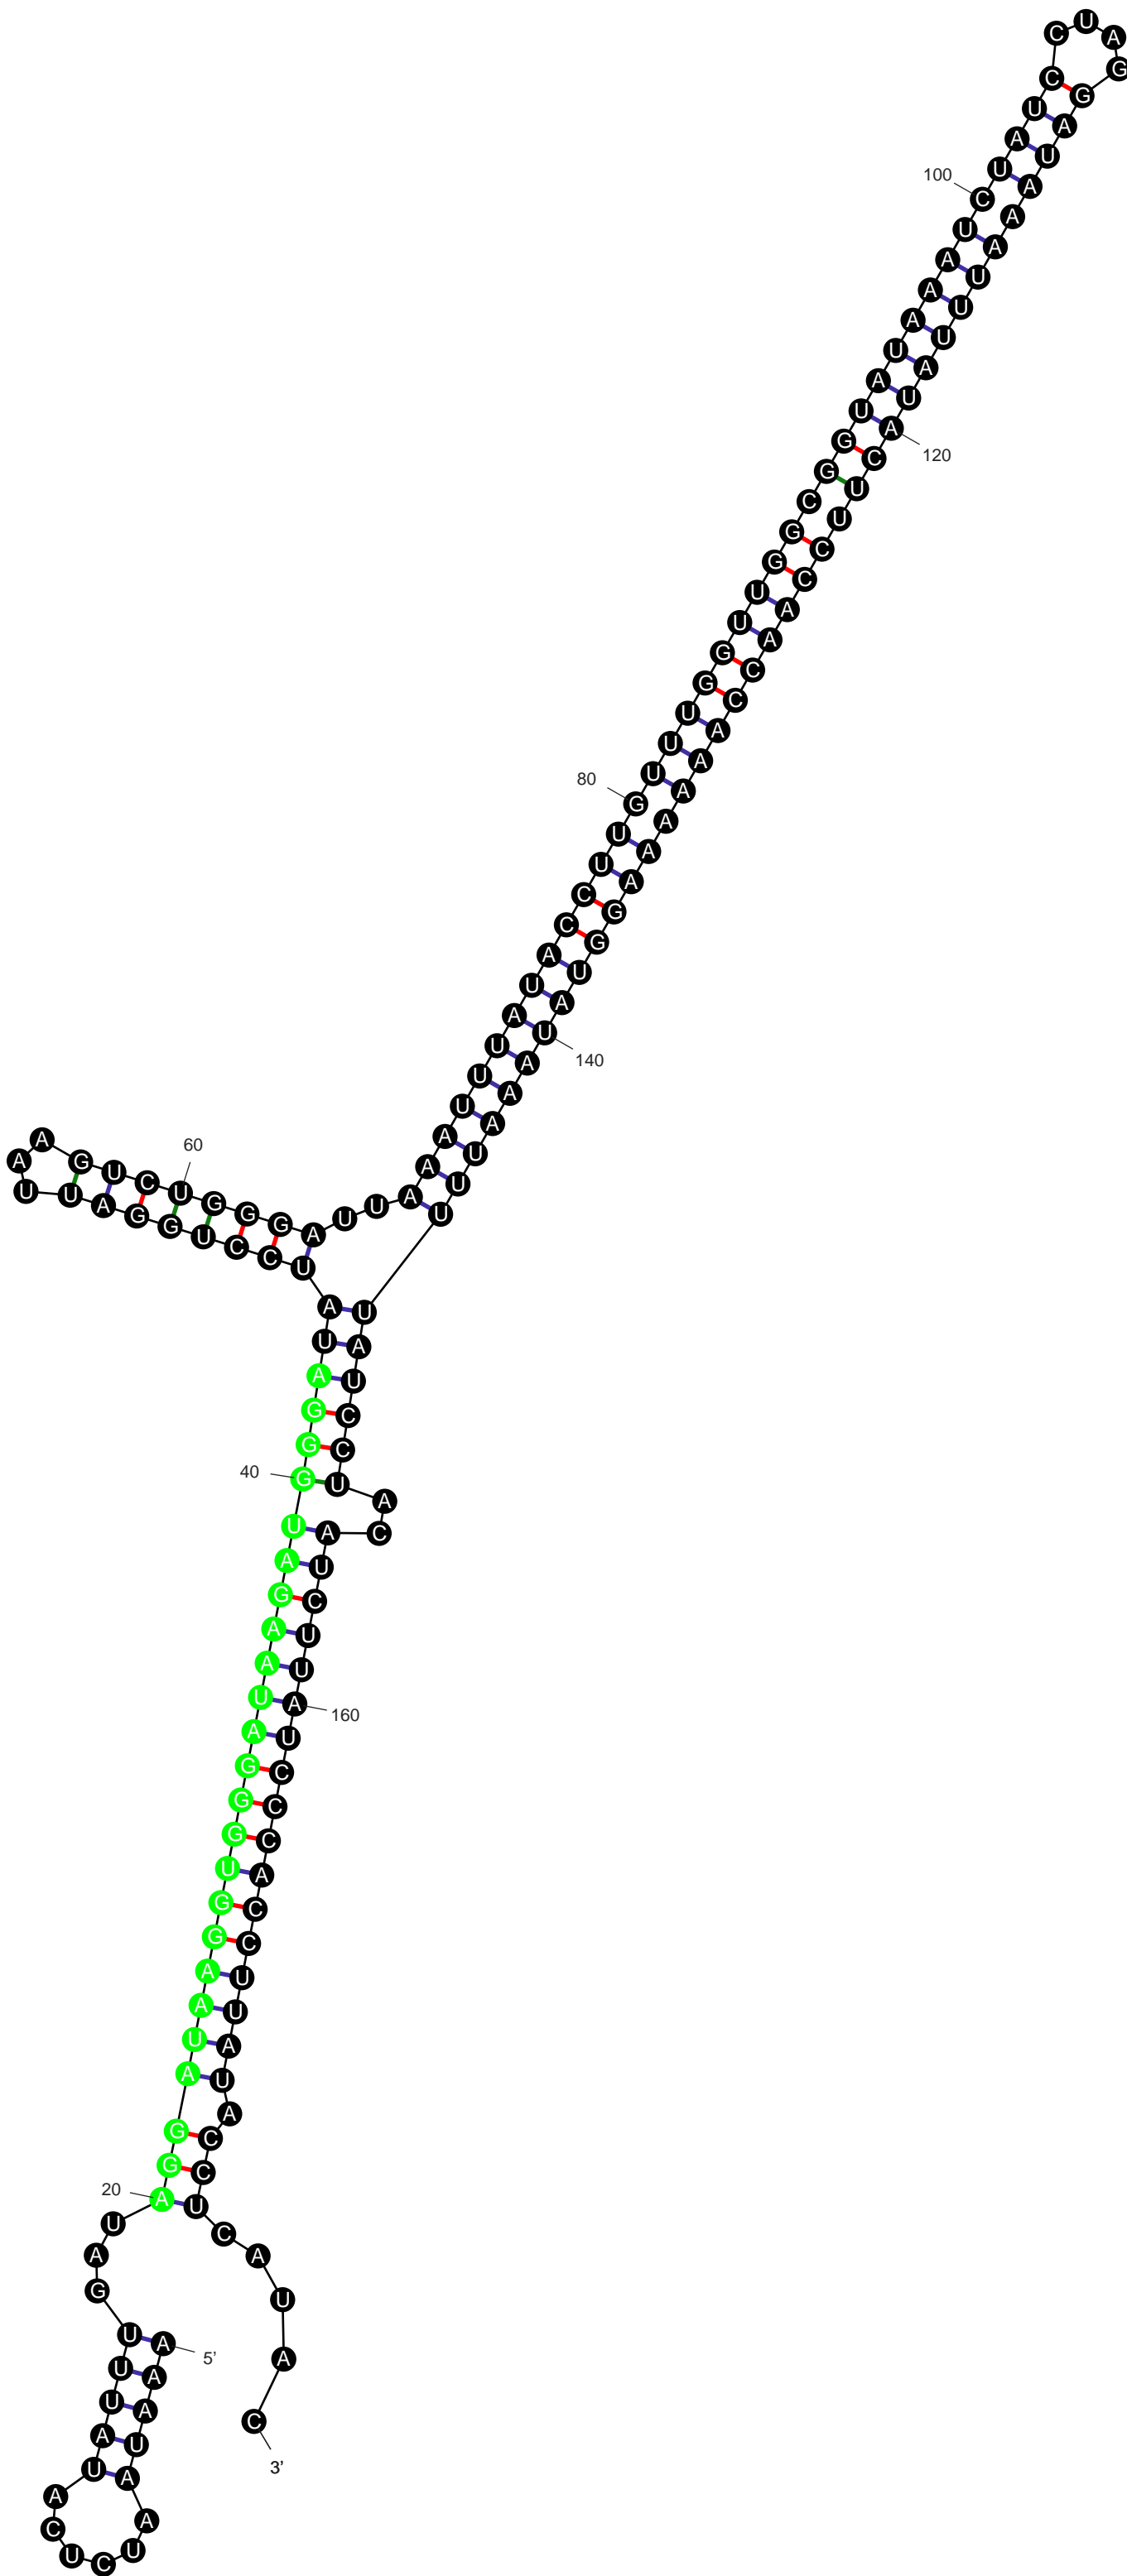

$dG = -77.90$  nta-miRn44

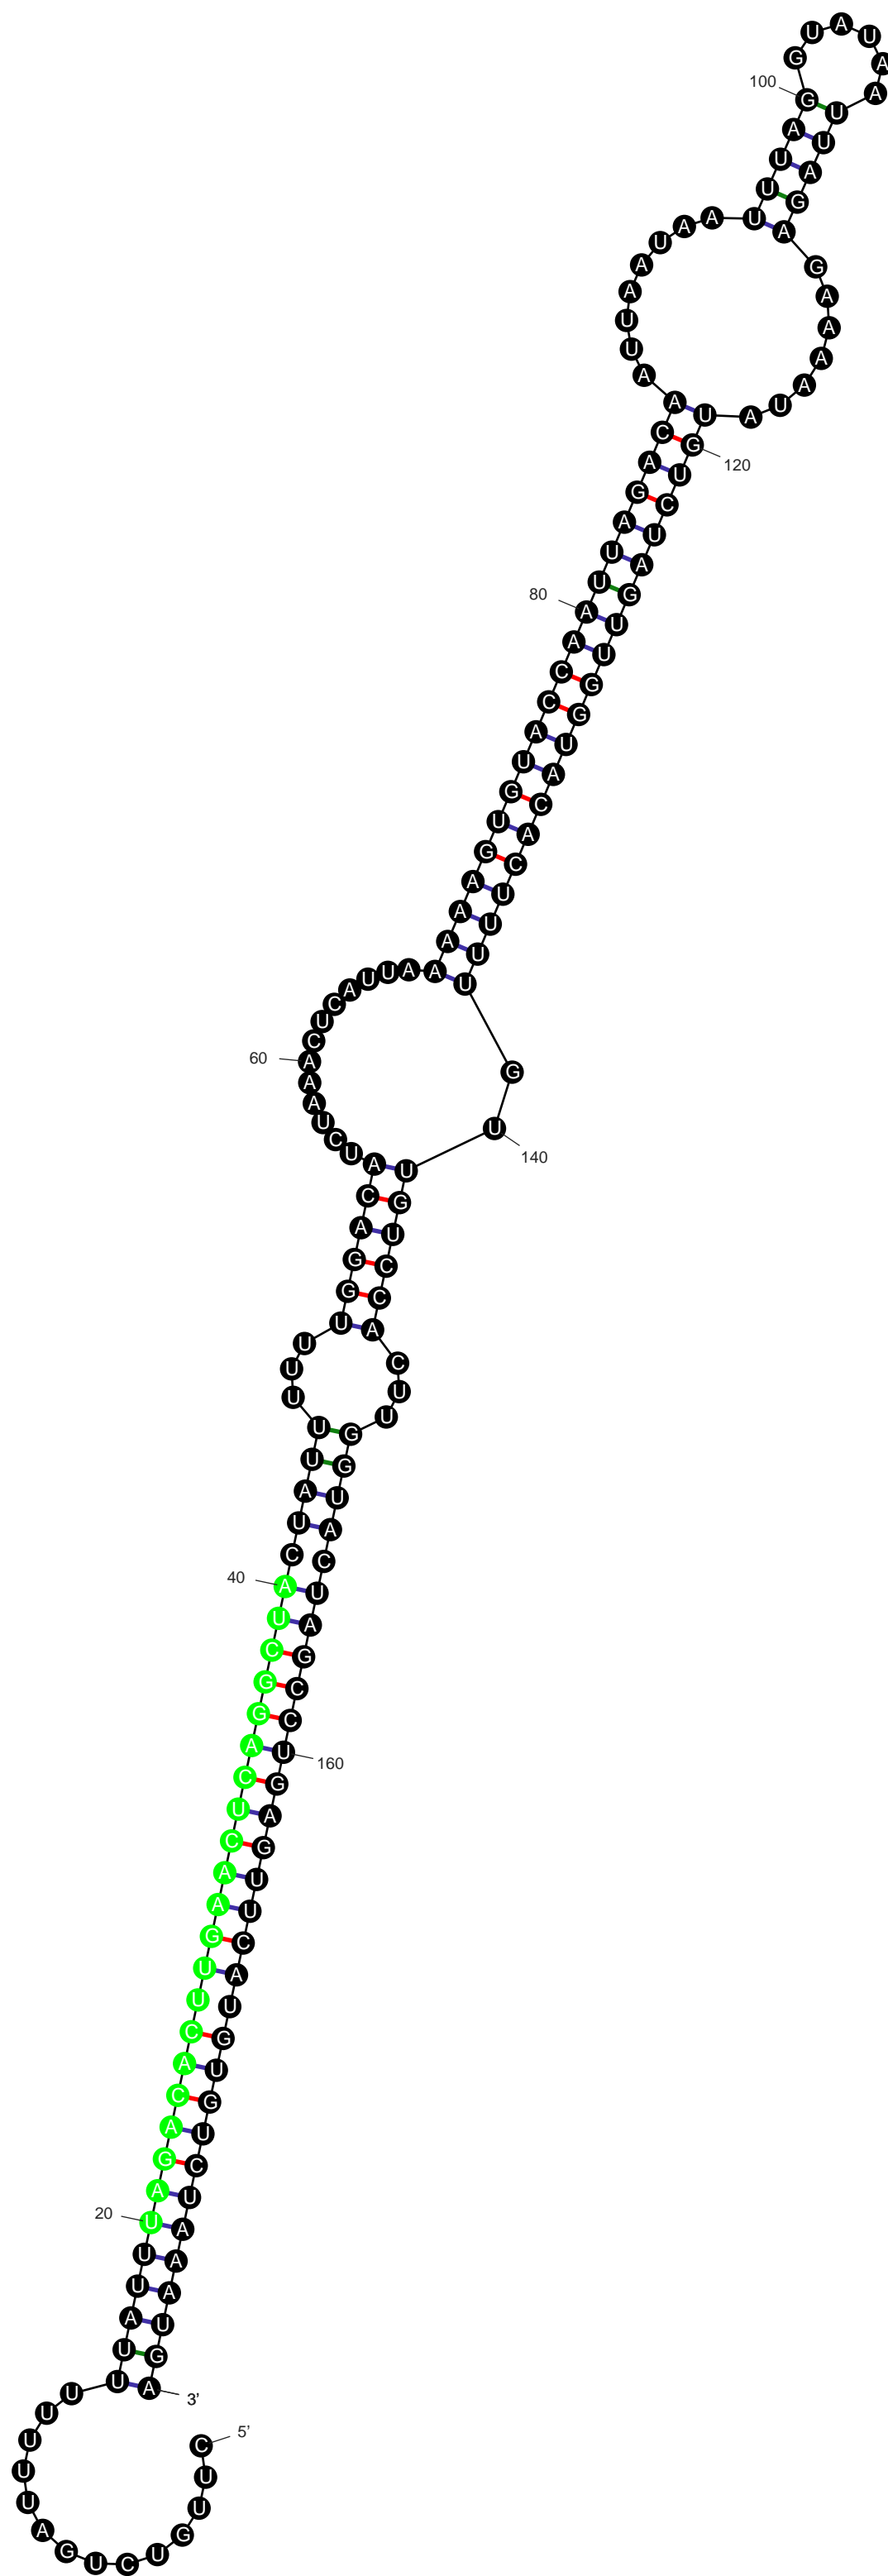

$dG = -69.10$  nta-miRn45

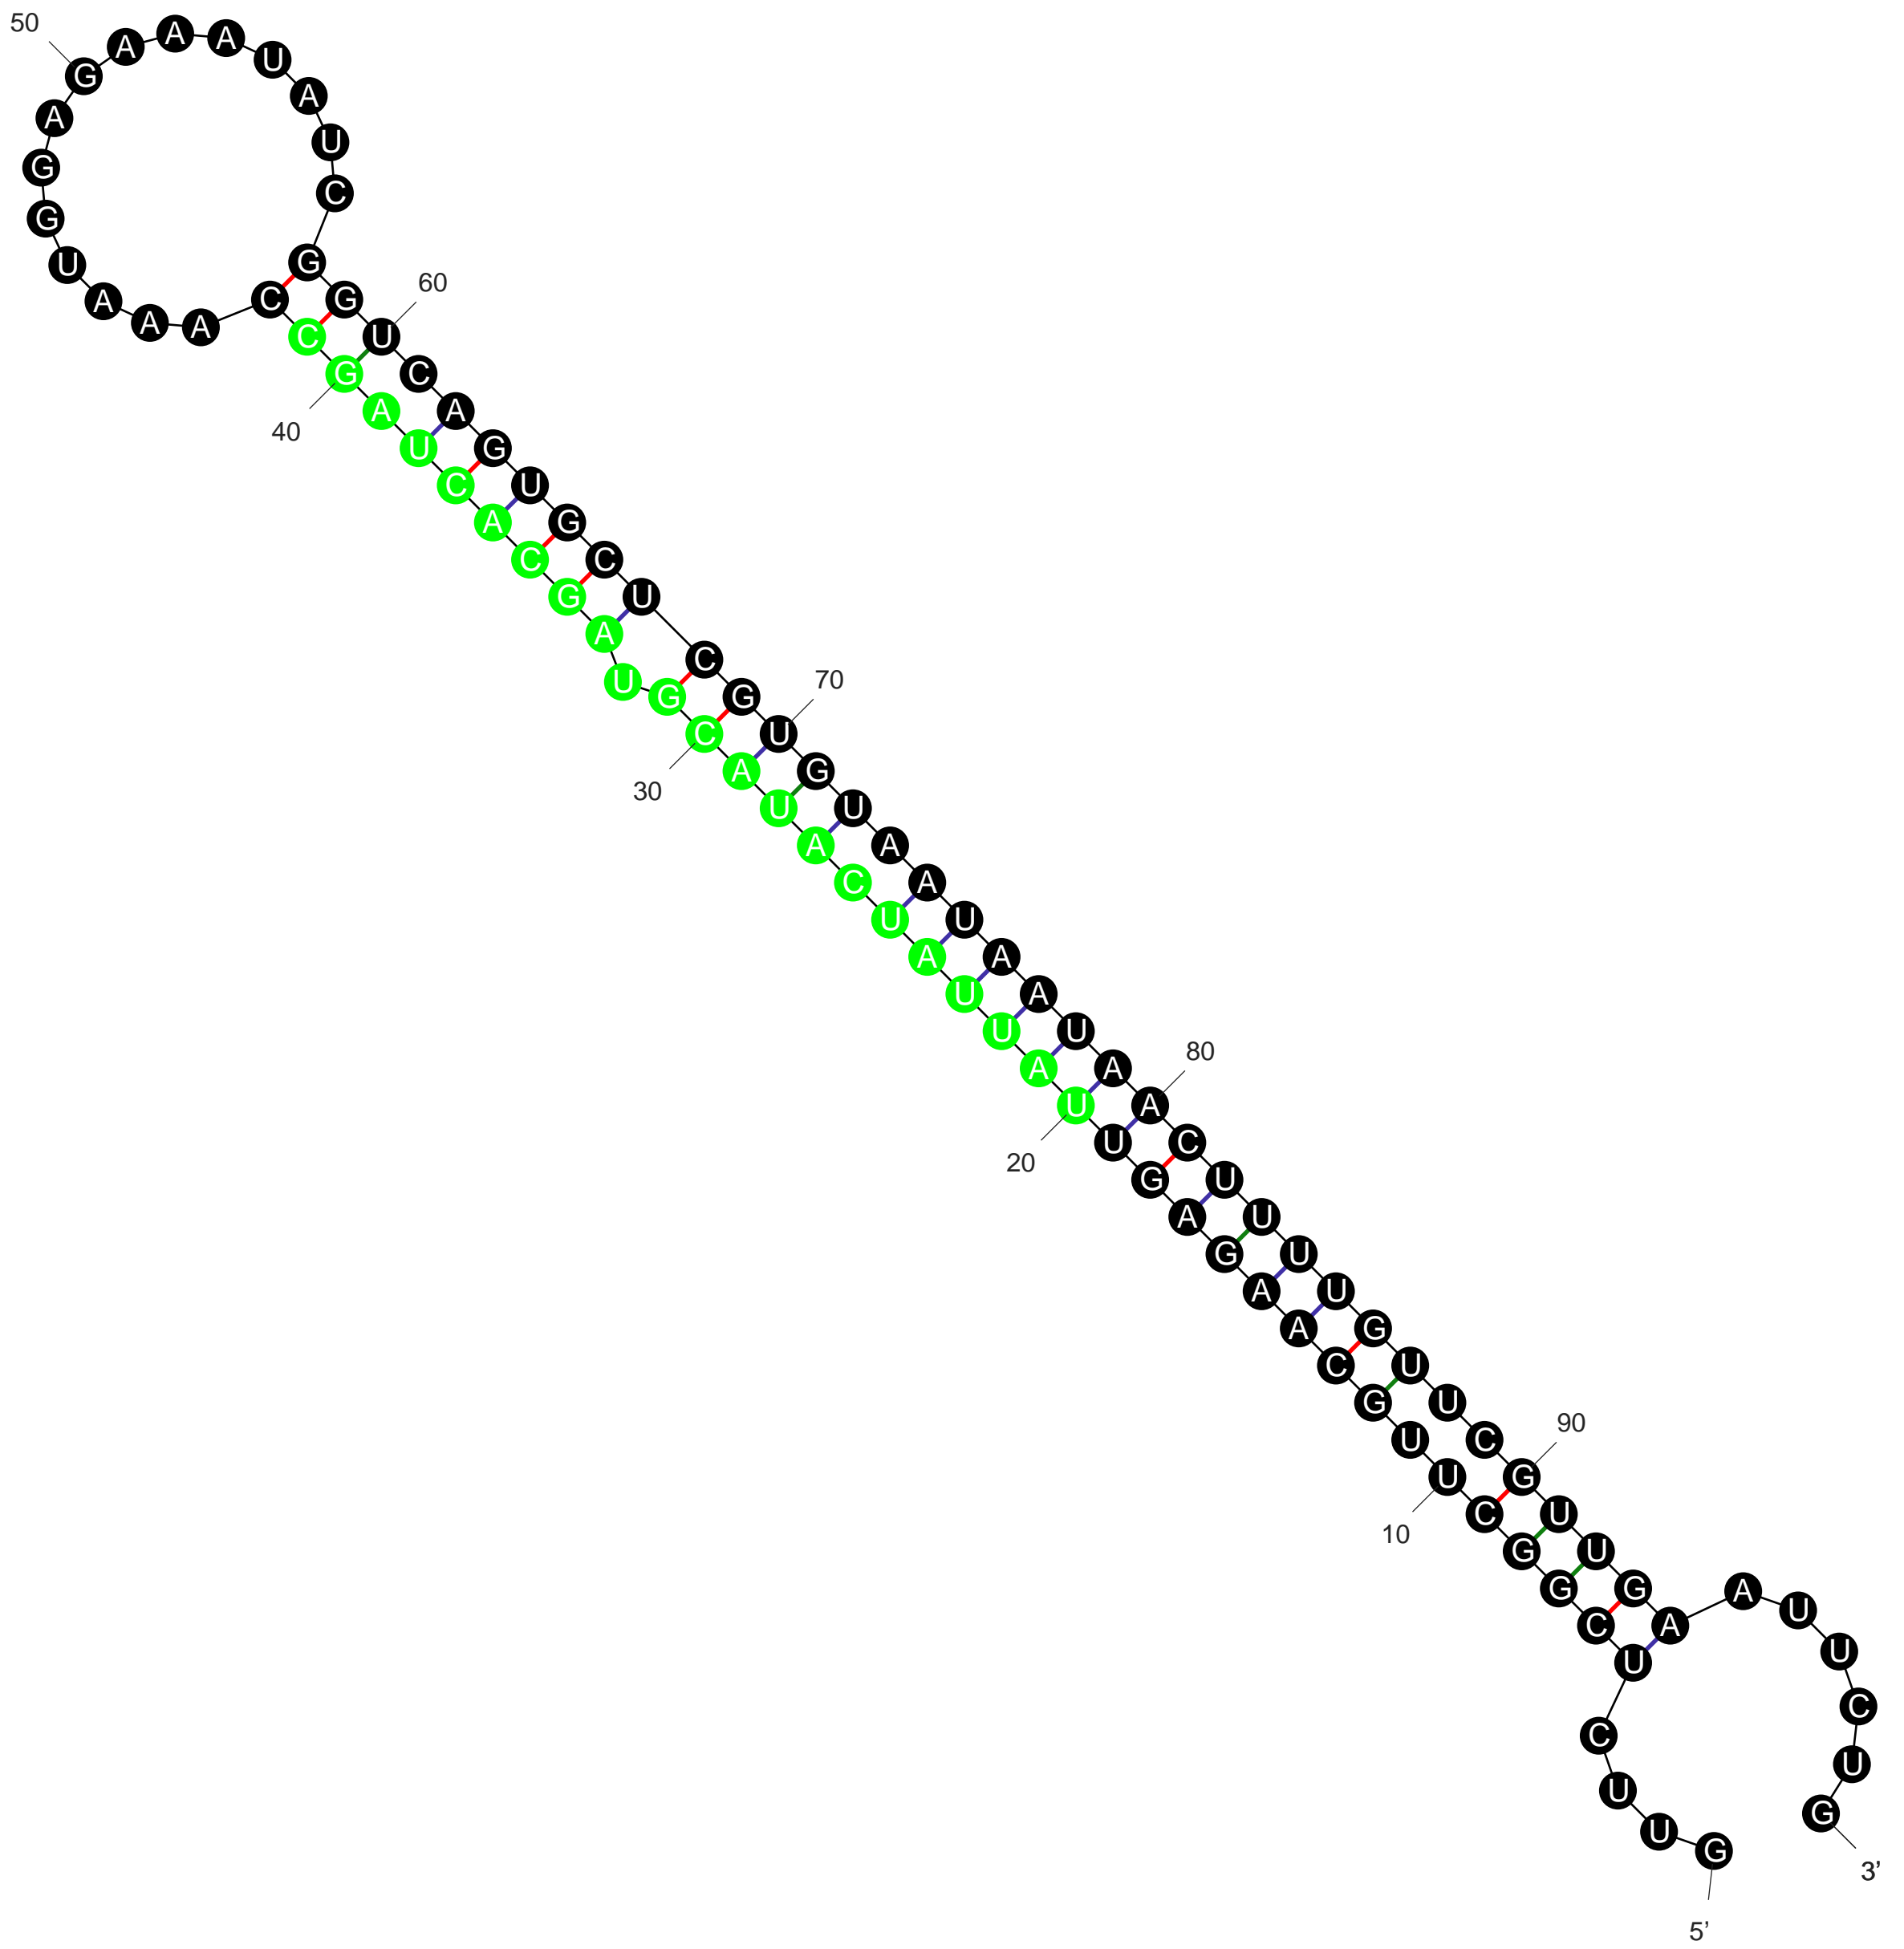

$dG = -36.10$  nta-miRn46

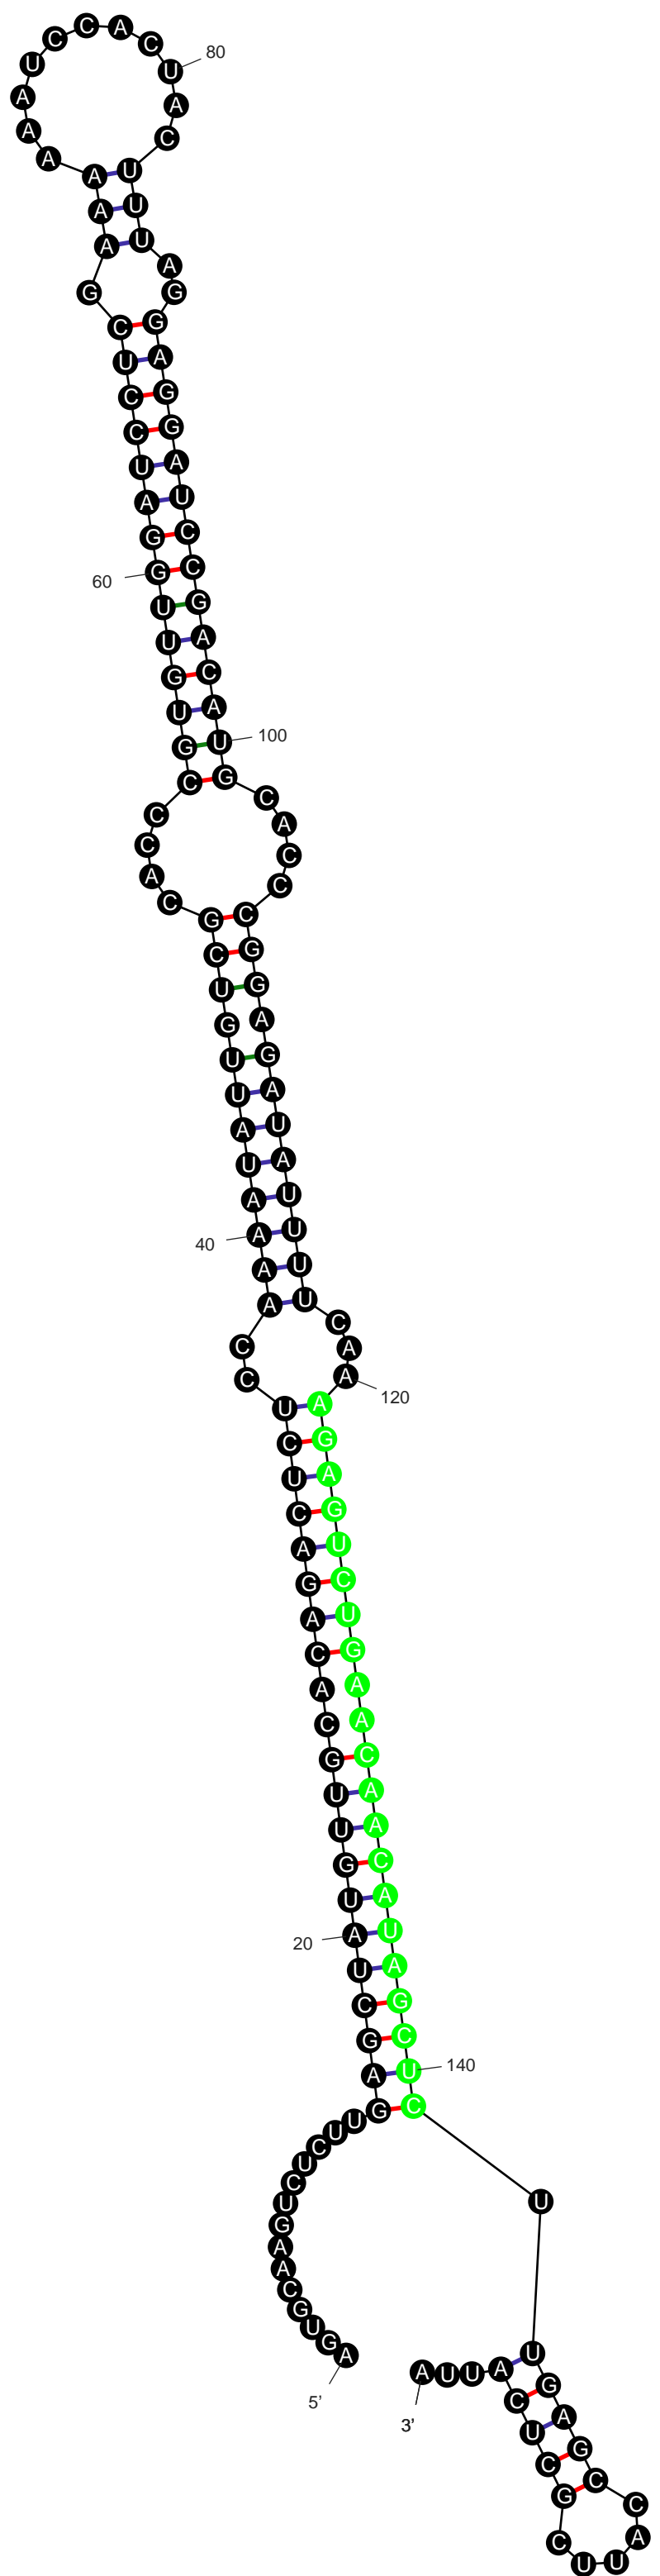

*dG = -59.20 nta-miRn47*

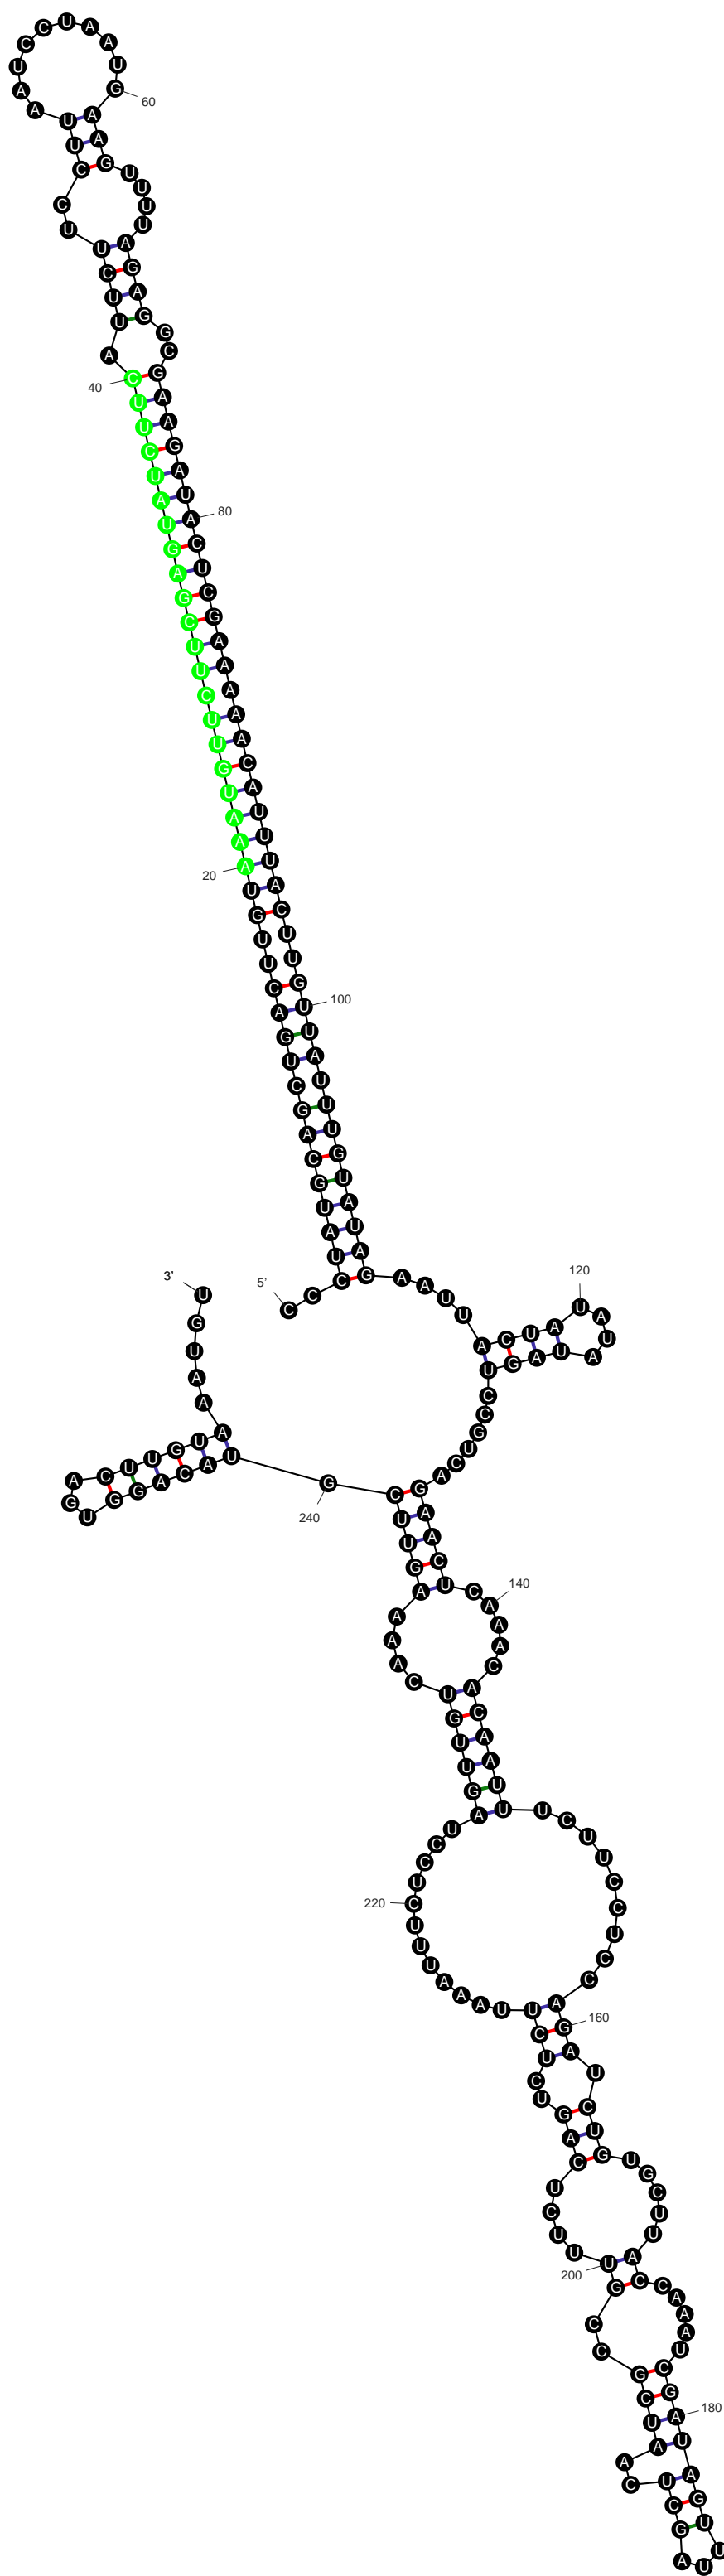

$dG = -58.40$  nta-miRn48



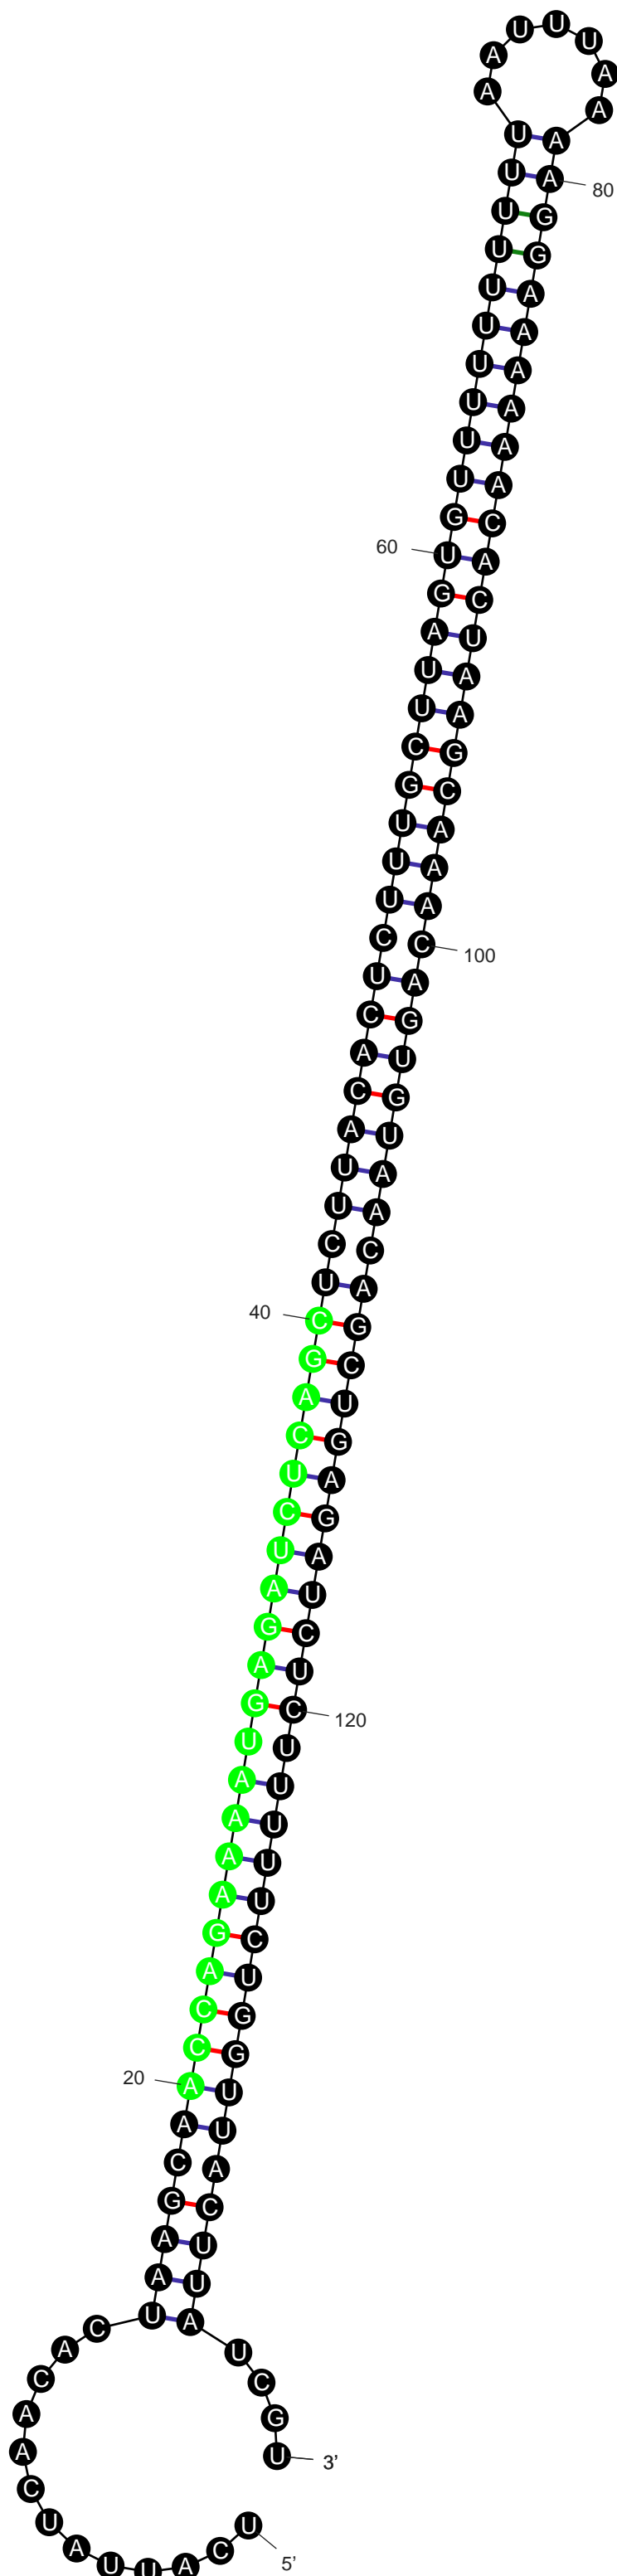

$dG = -69.20$  nta-miRn50







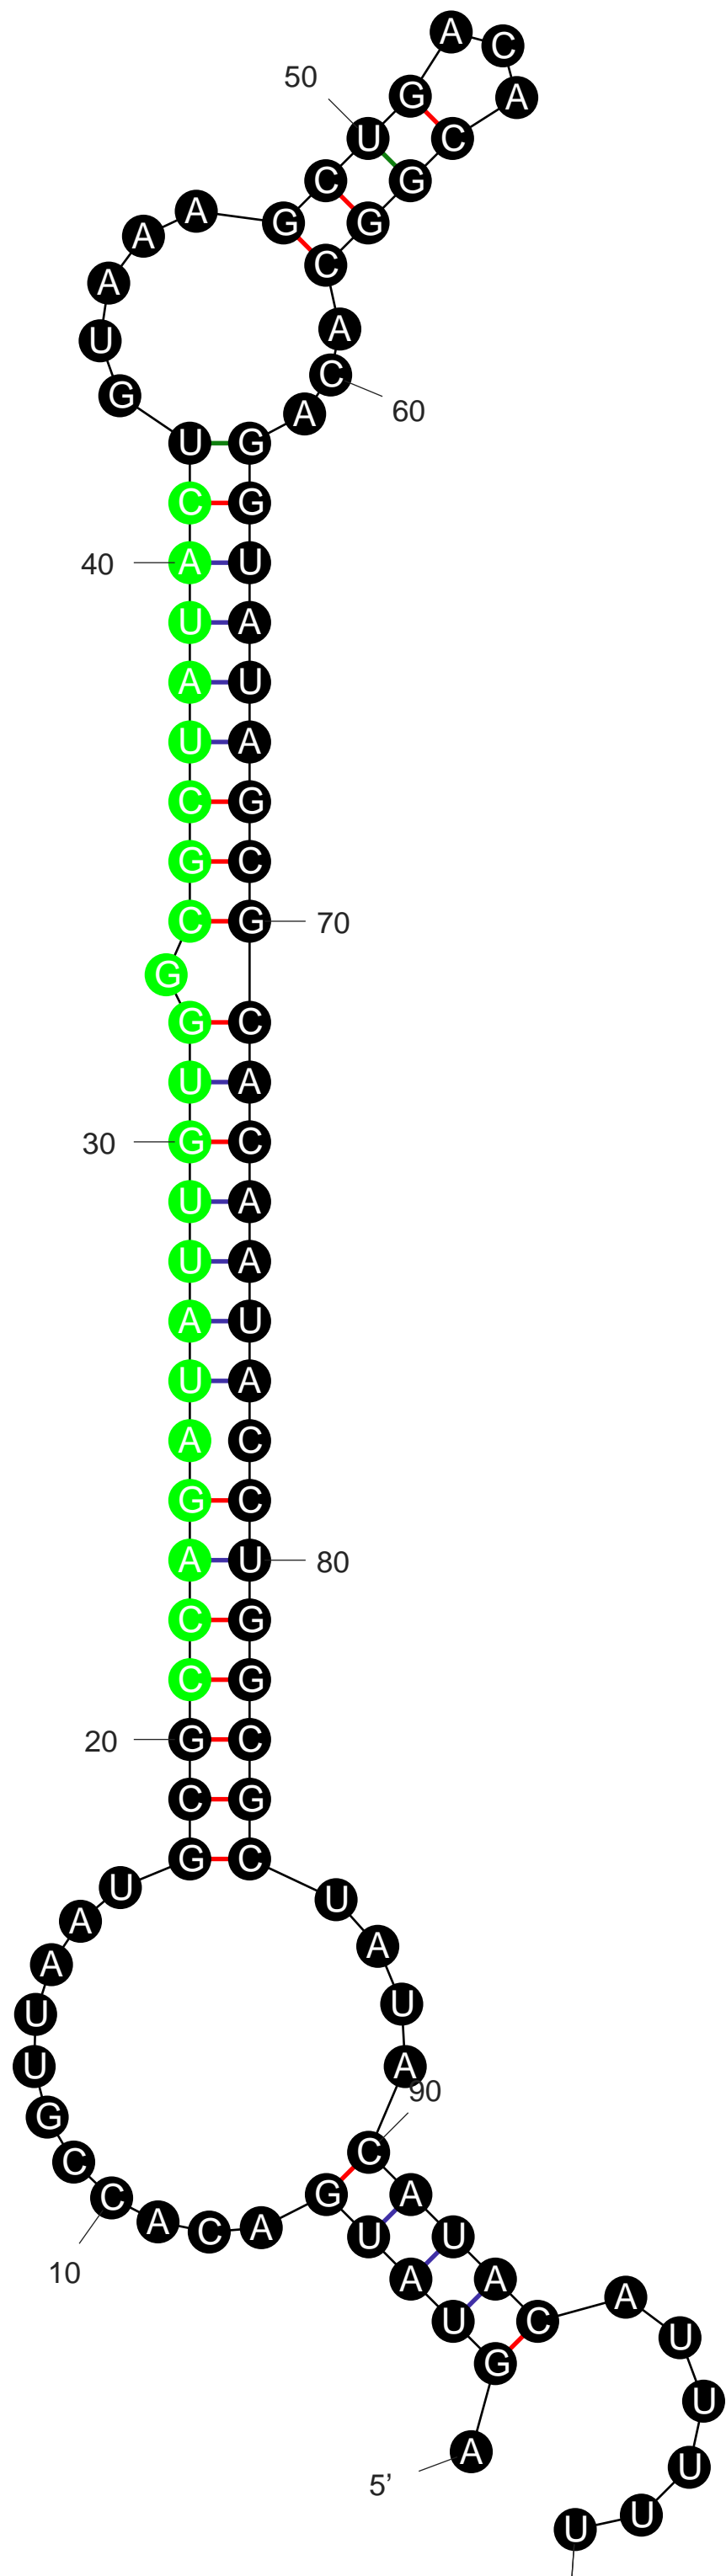

$dG = -39.20$  nta-miRn53

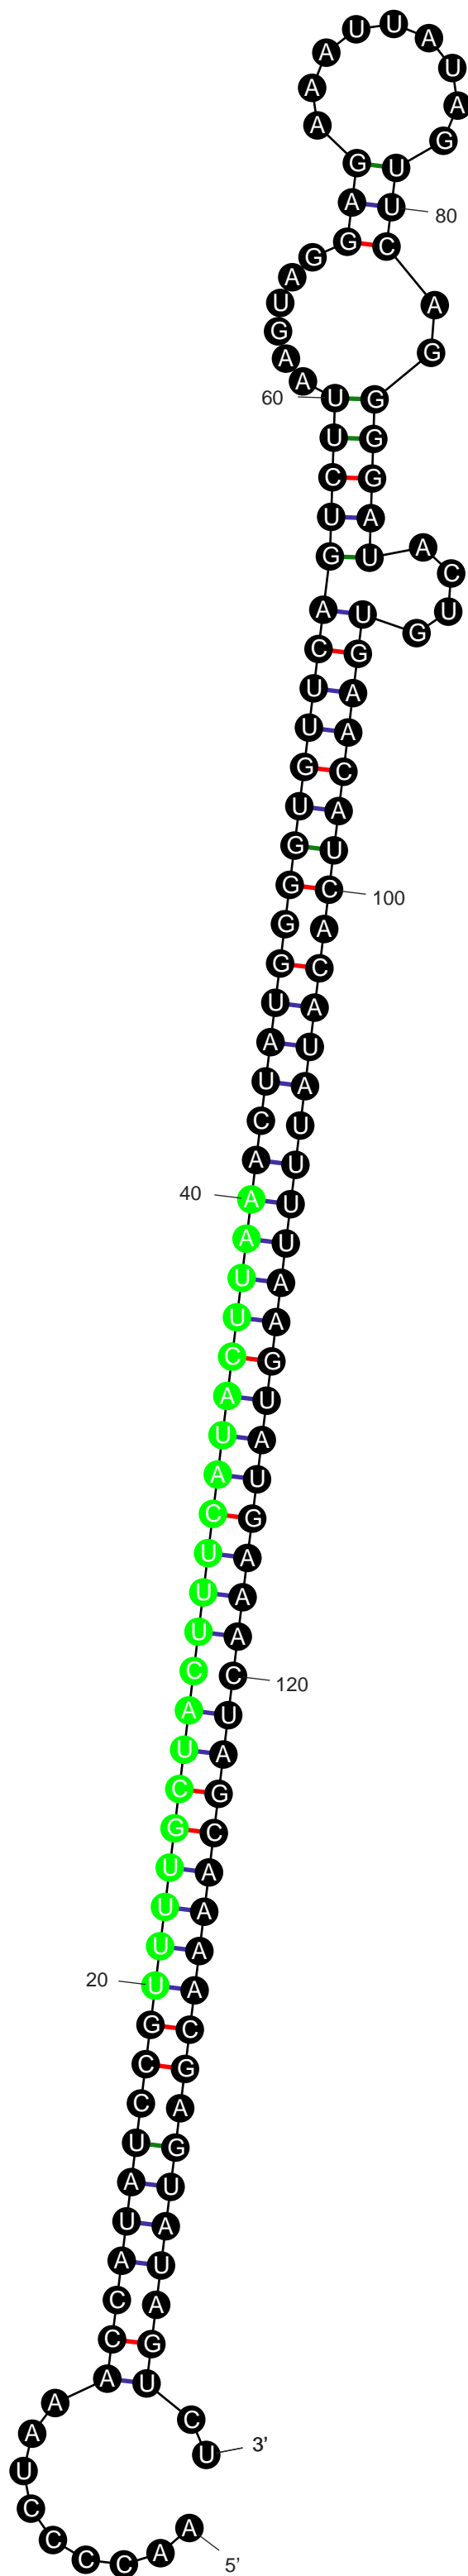

$dG = -45.30$  nta-miRn54





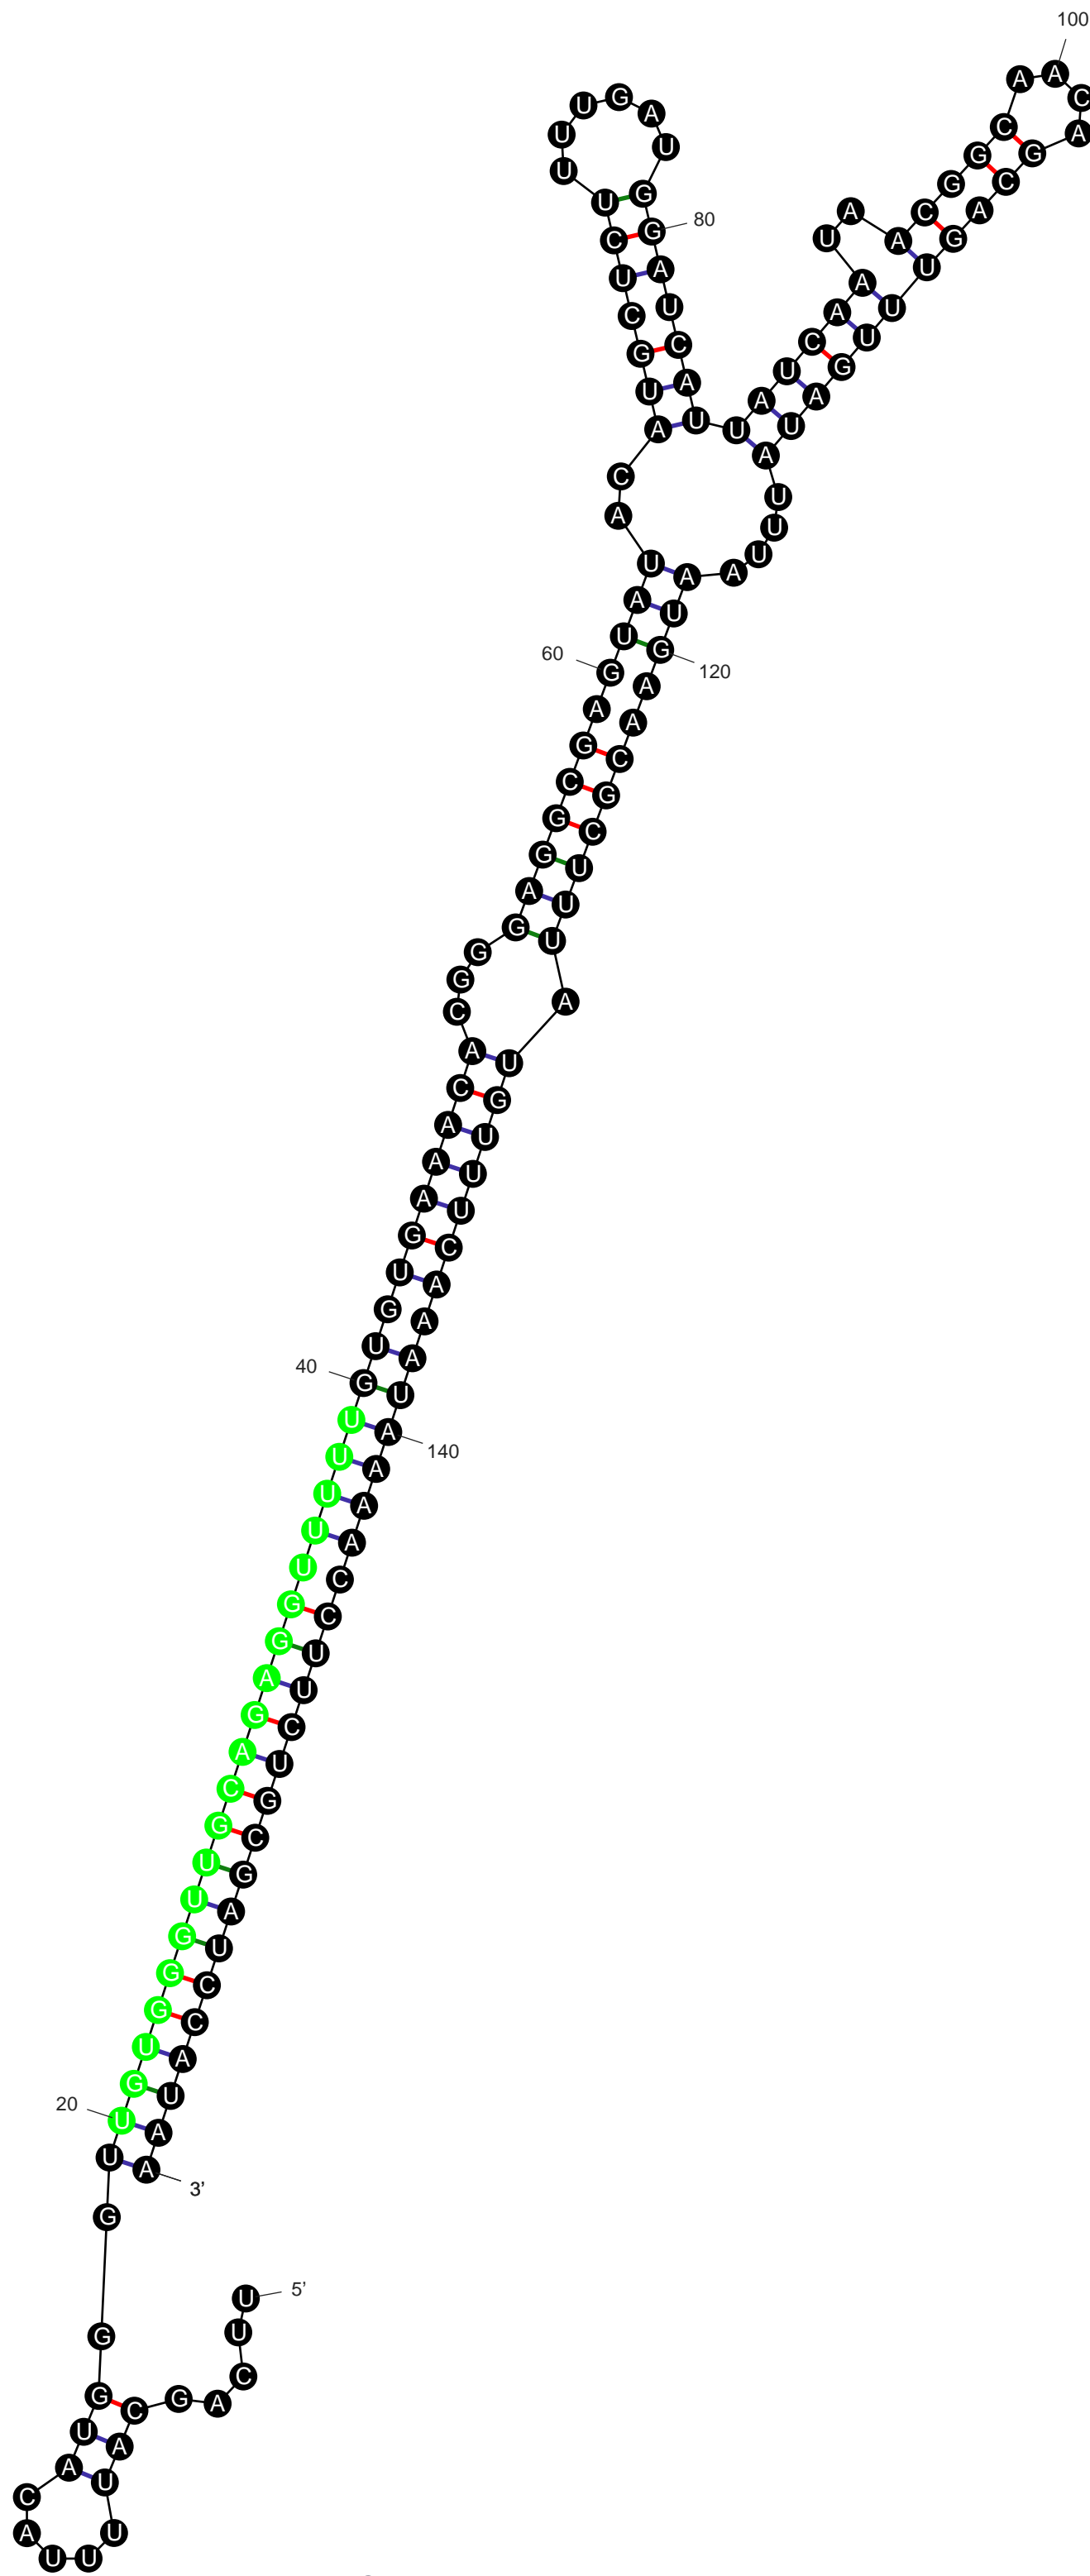

$dG = -46.60$  nta-miRn57

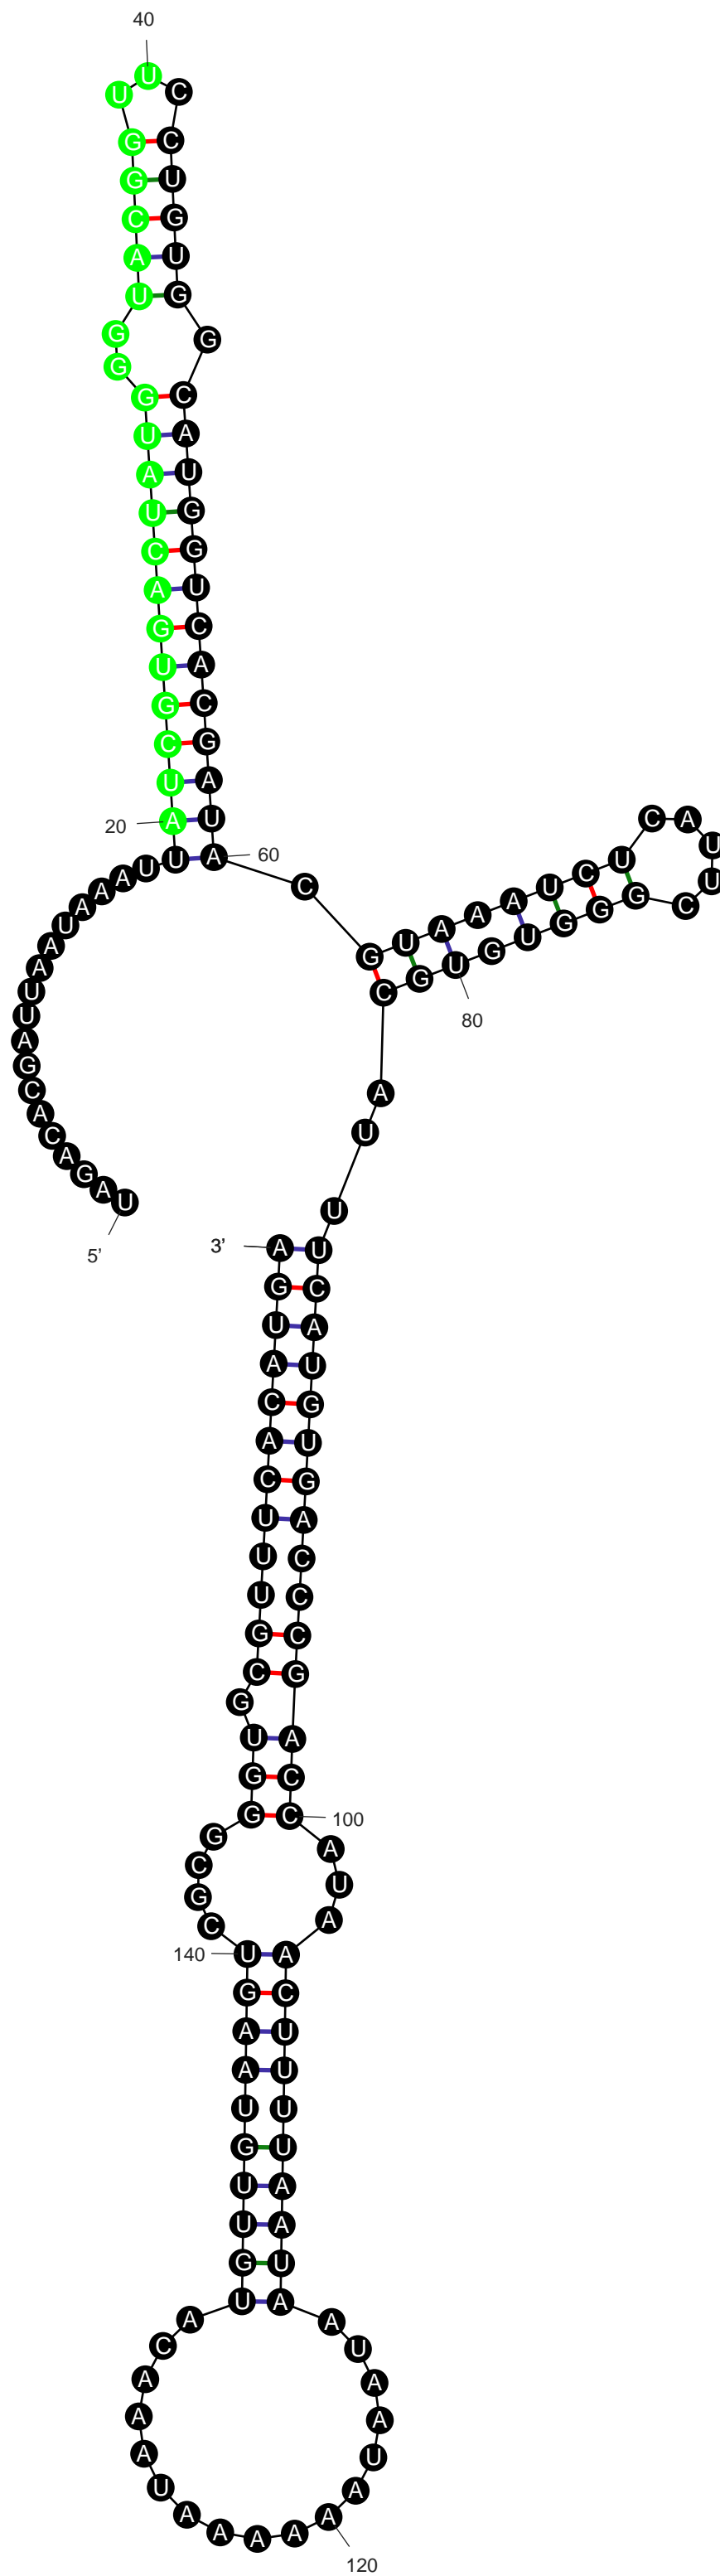

$dG = -40.80$  nta-miRn58

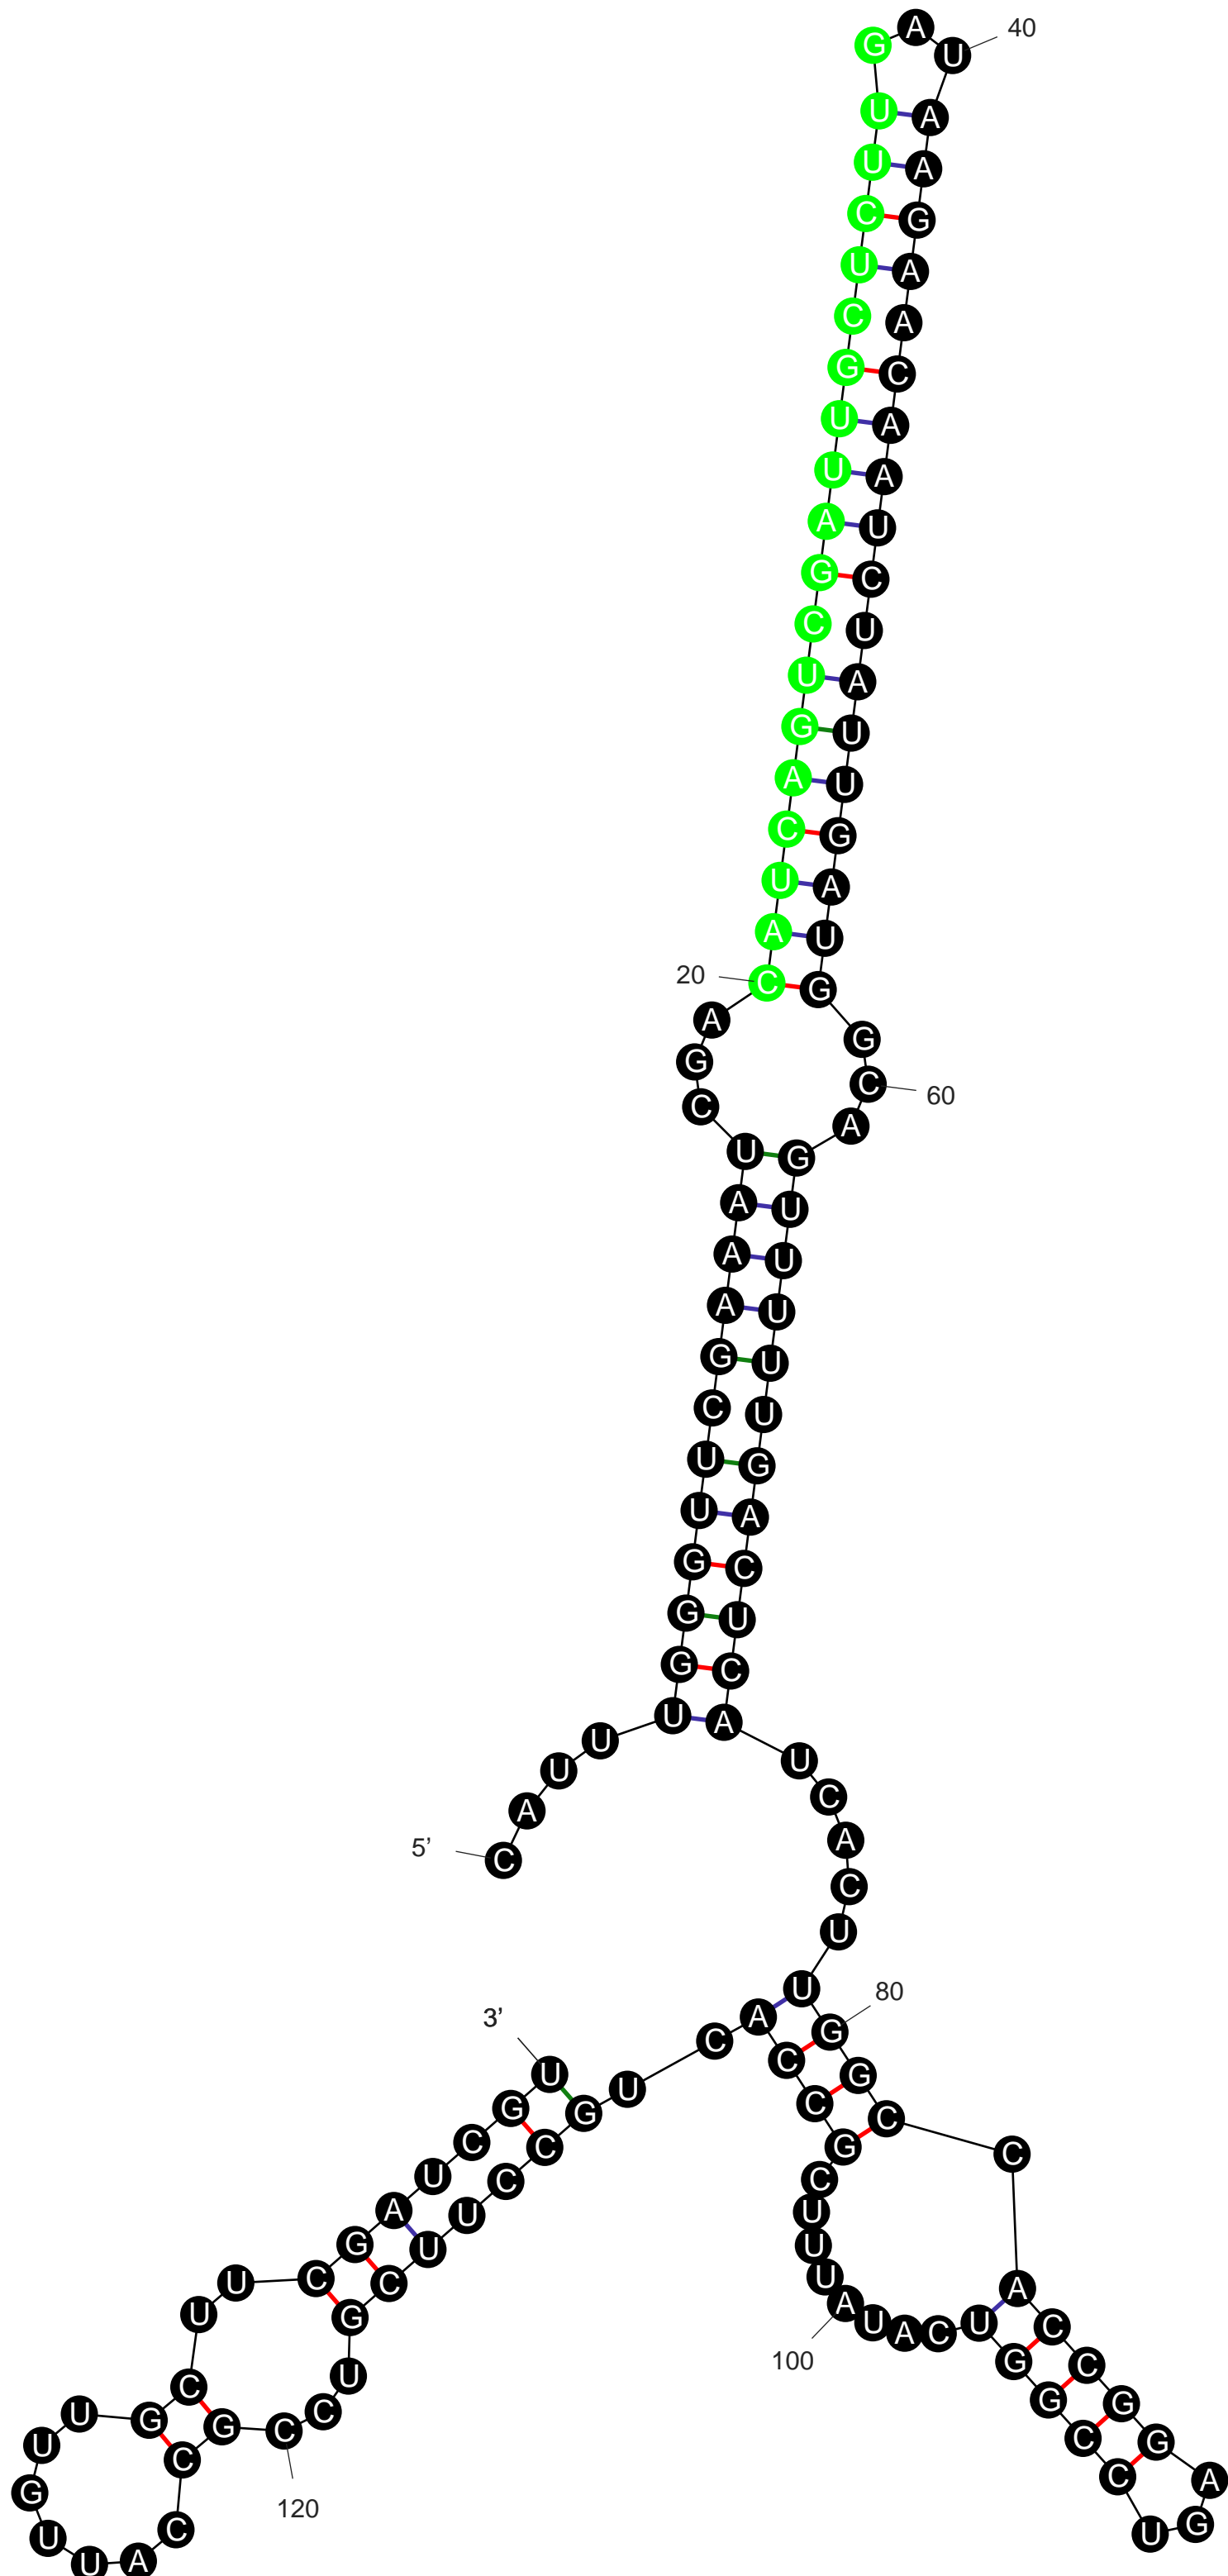

*dG = -35.30 nta-miRn59*











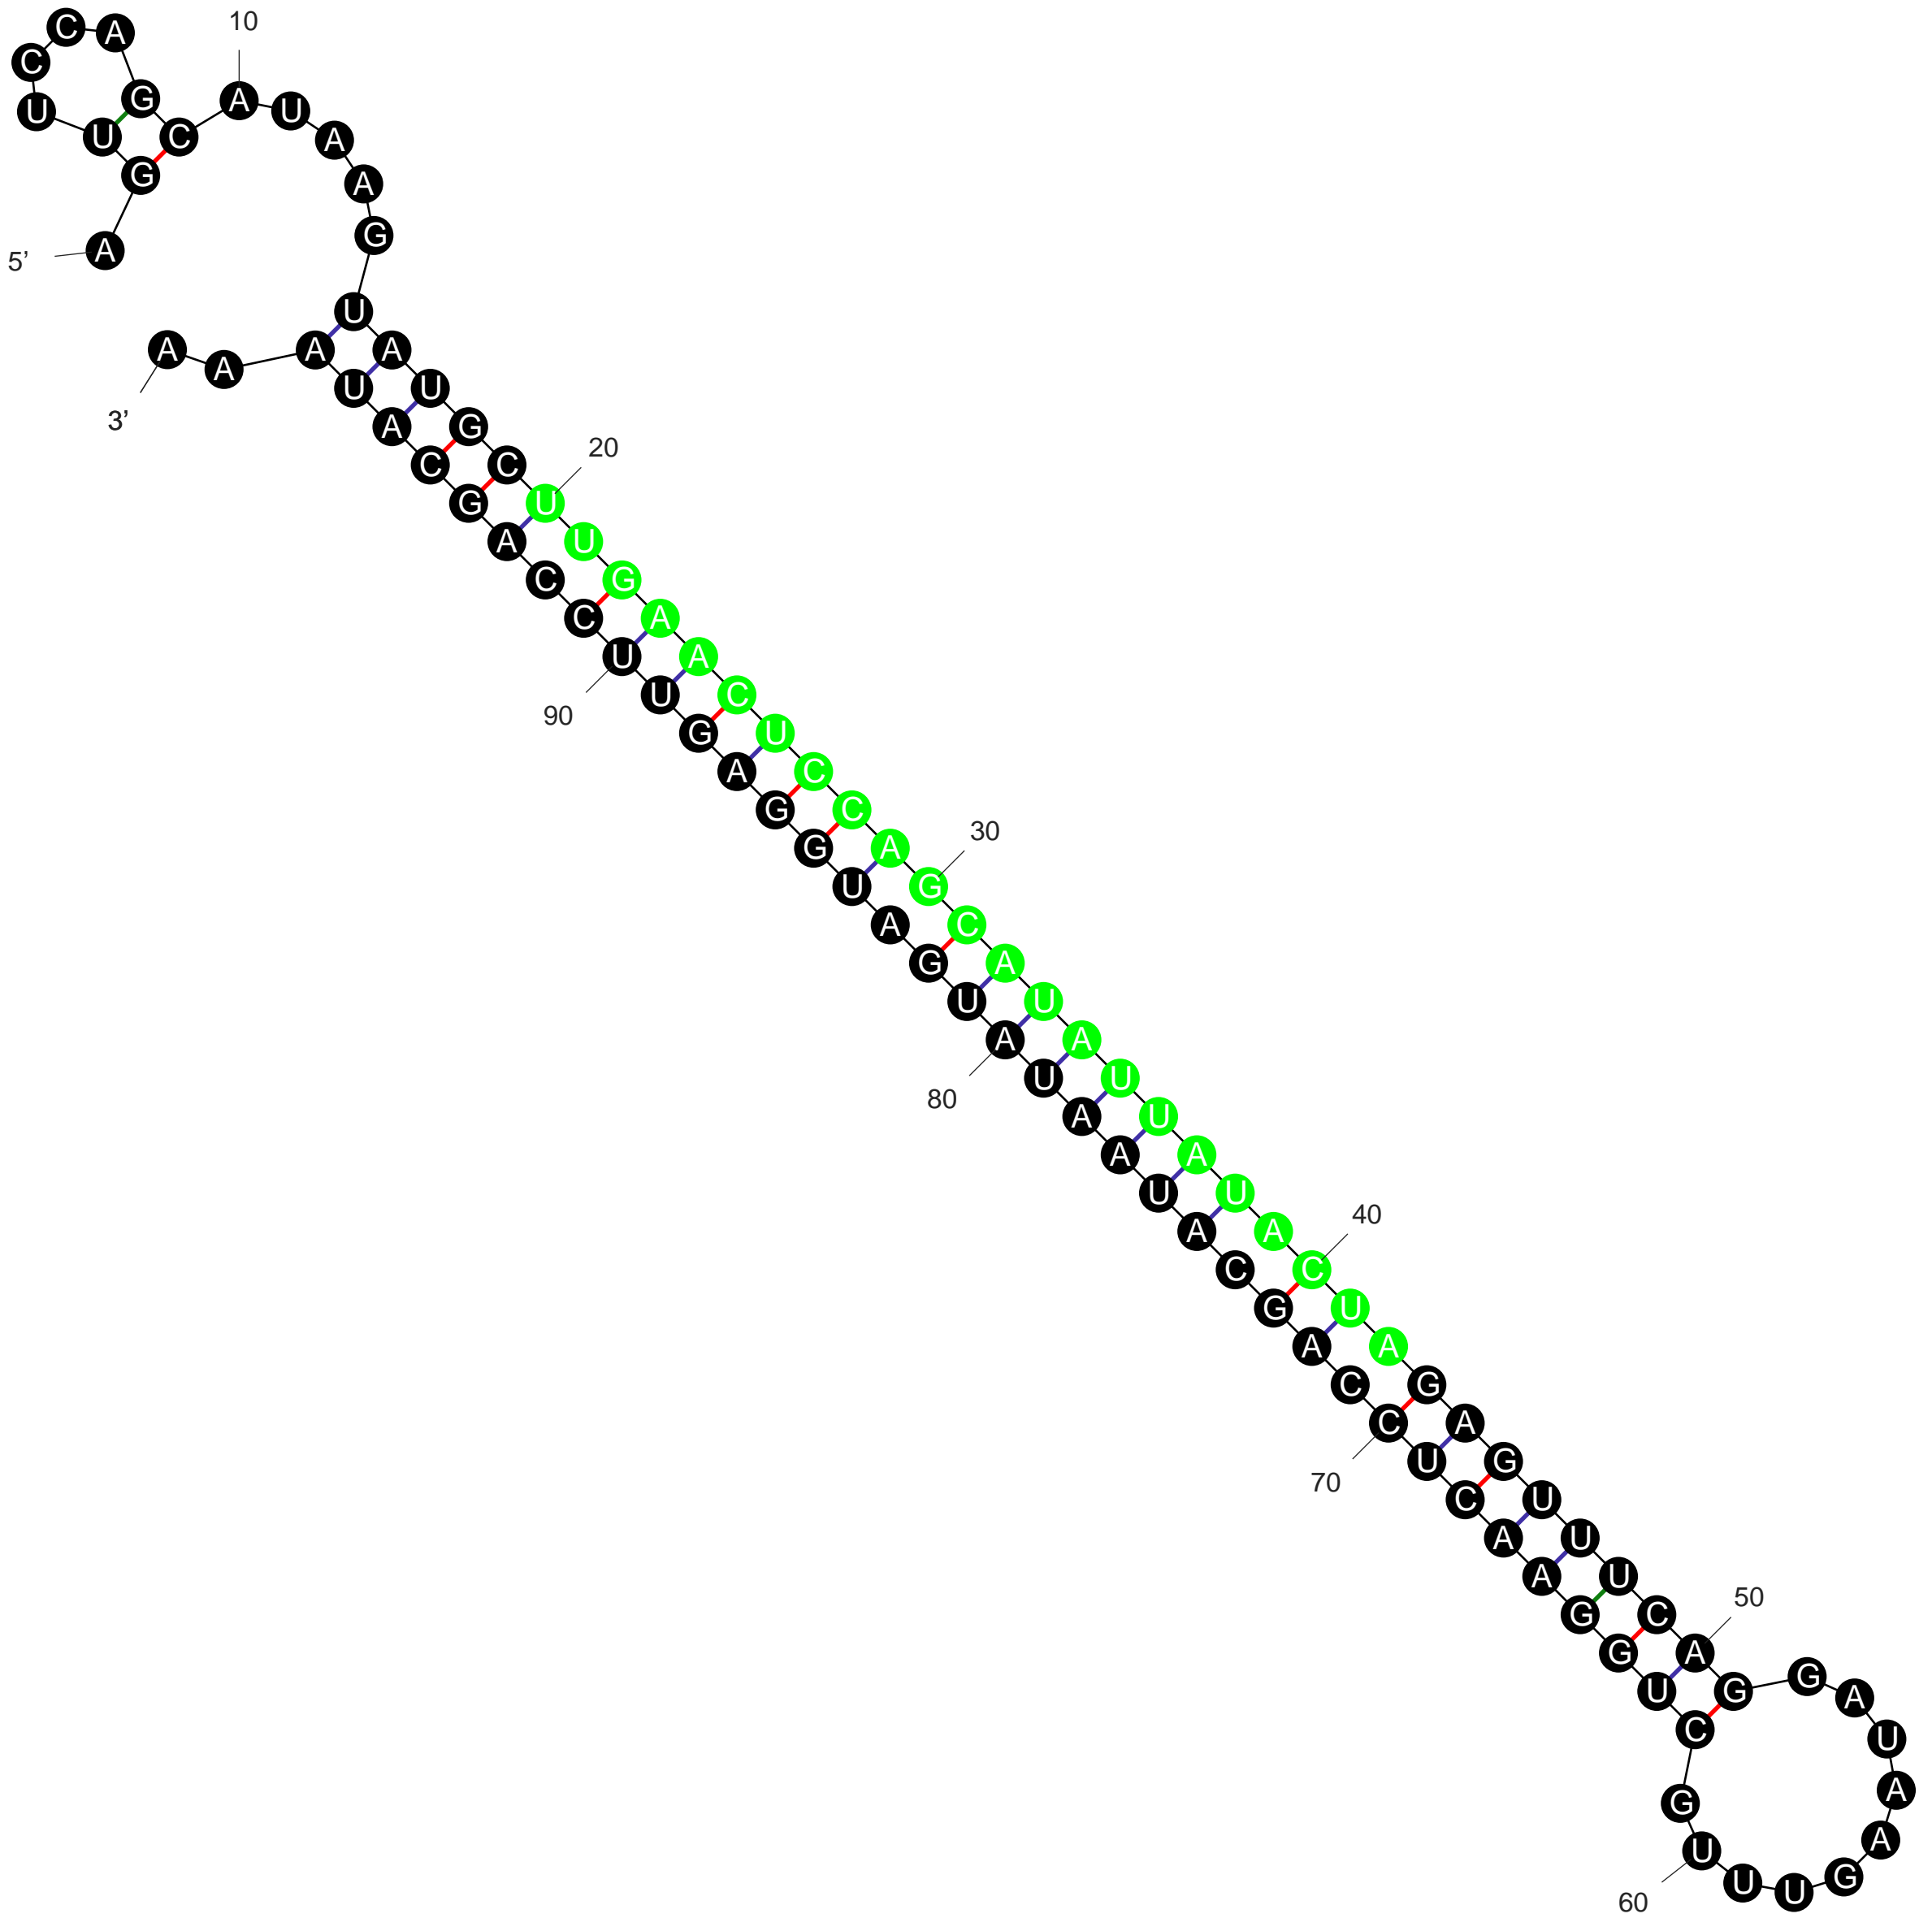

$dG = -39.10$  nta-miRn64





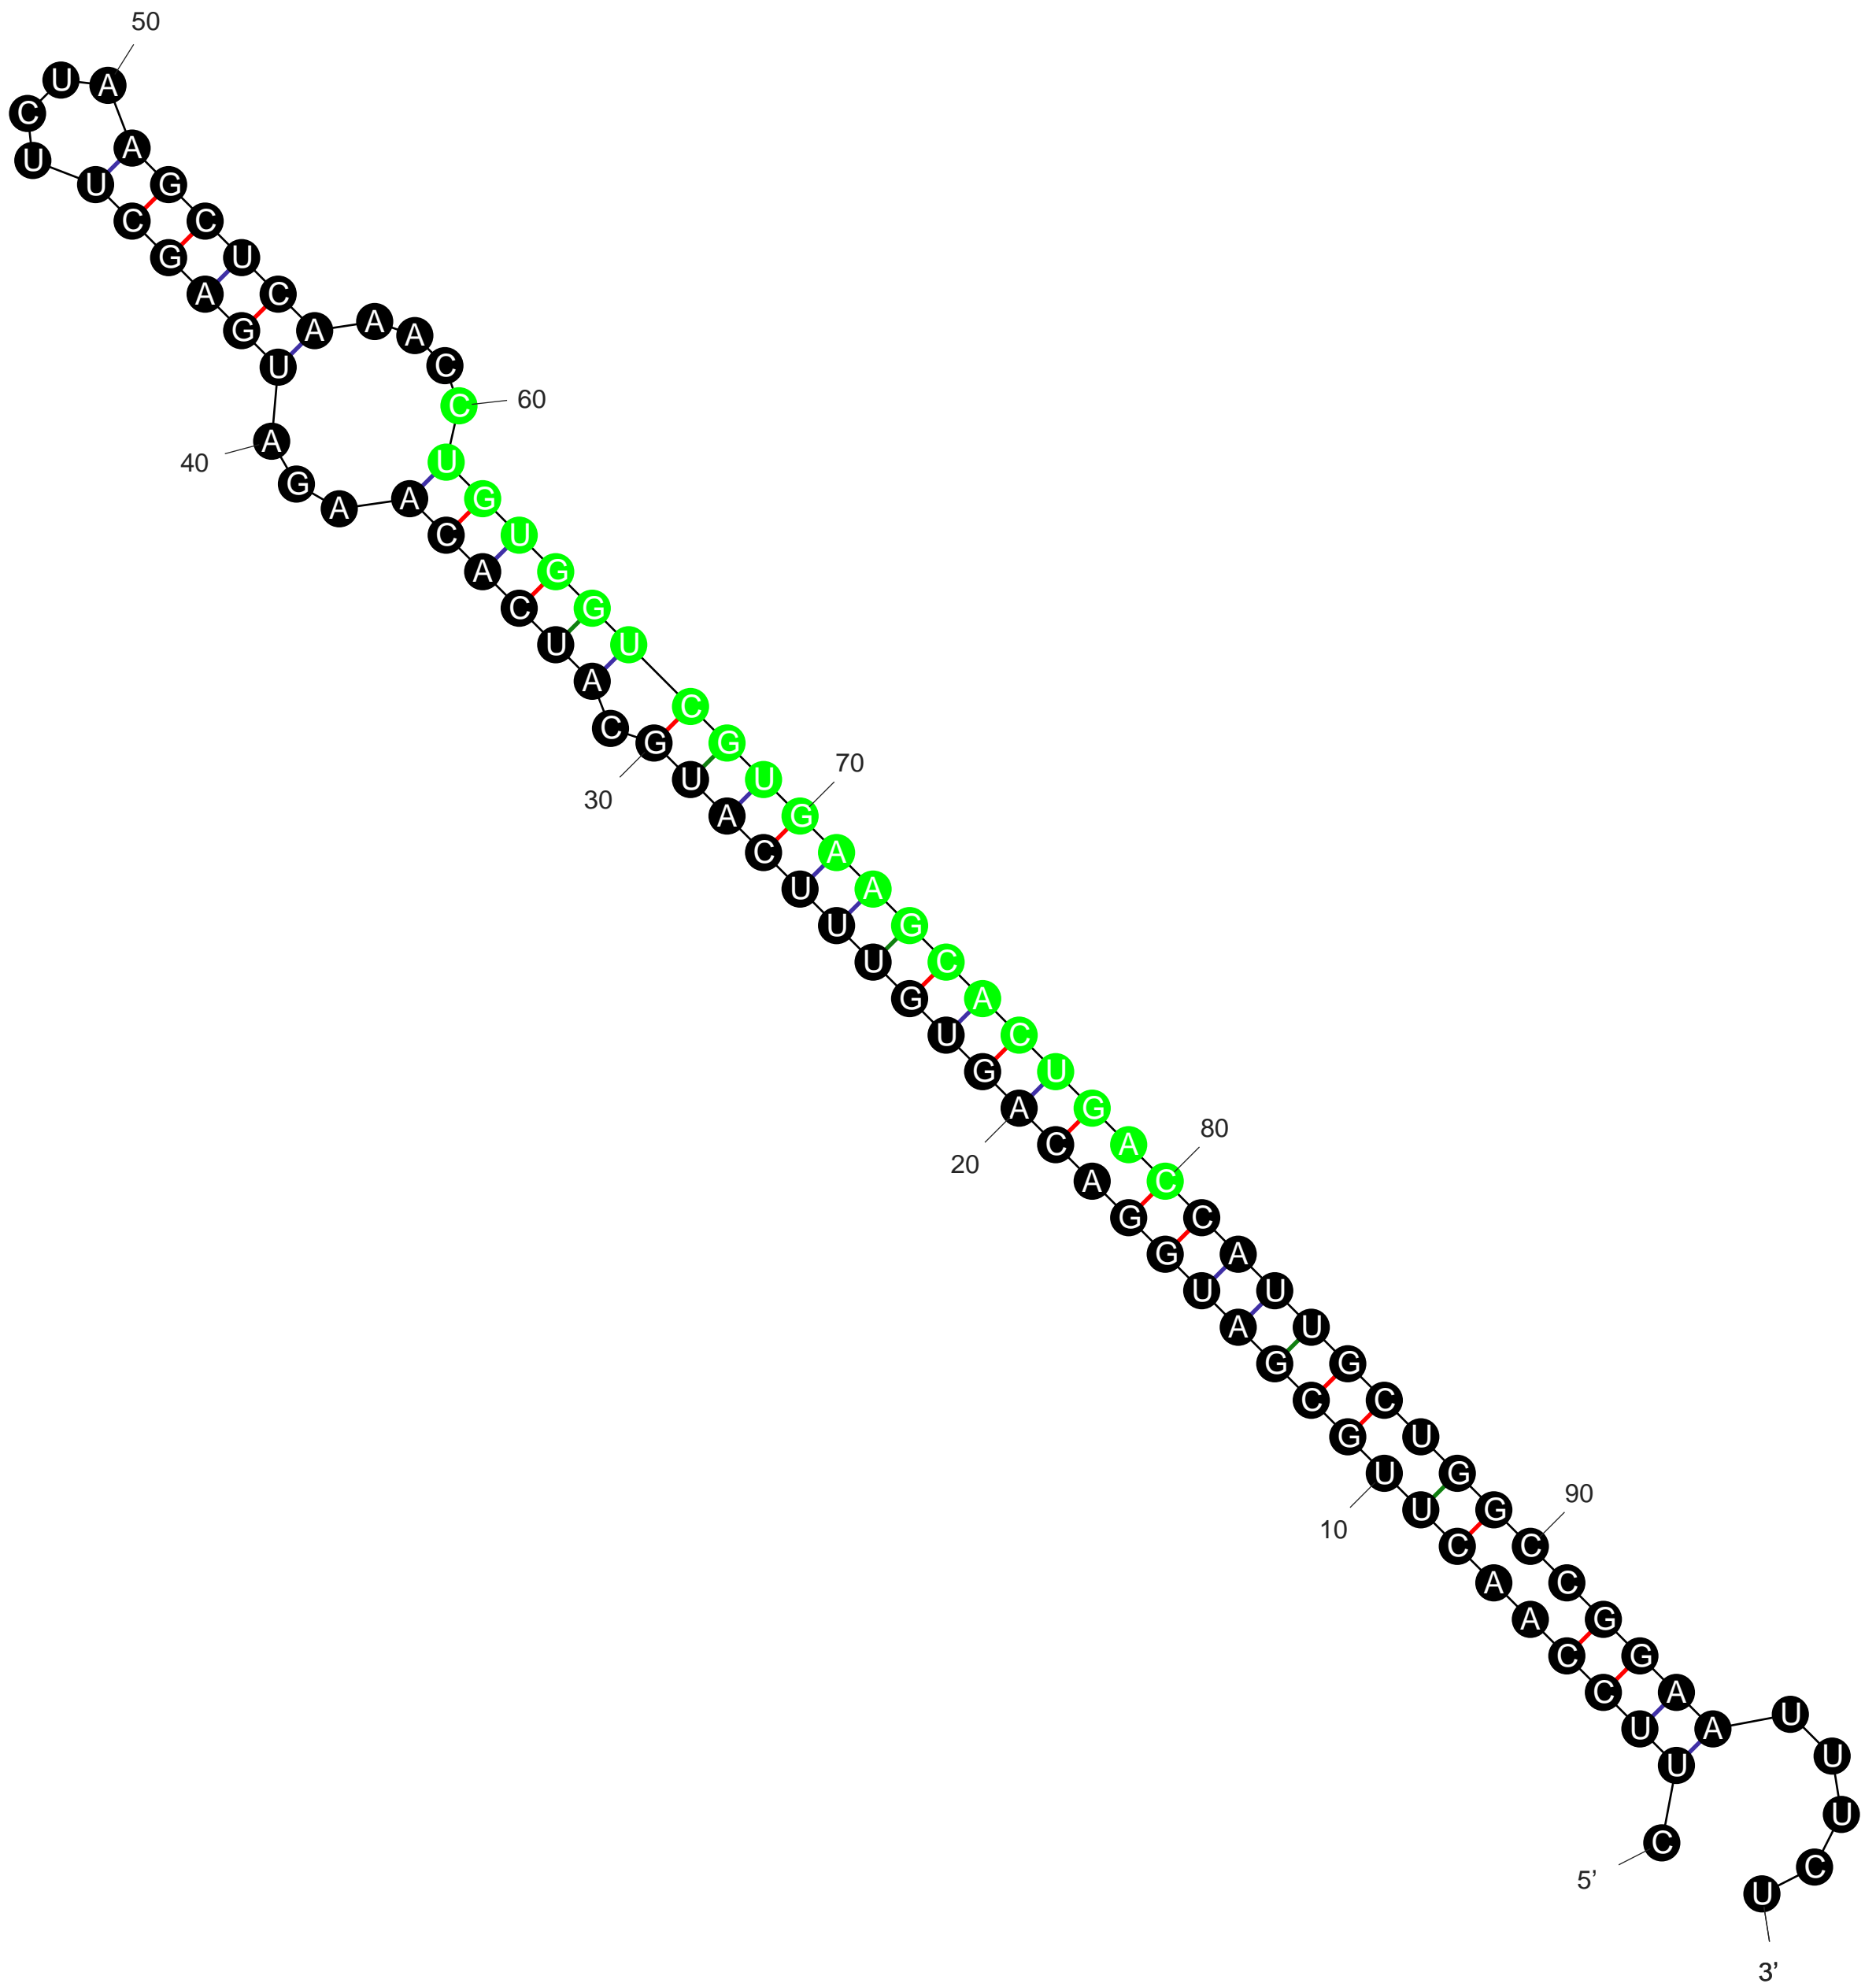

$dG = -42.30$  nta-miRn67



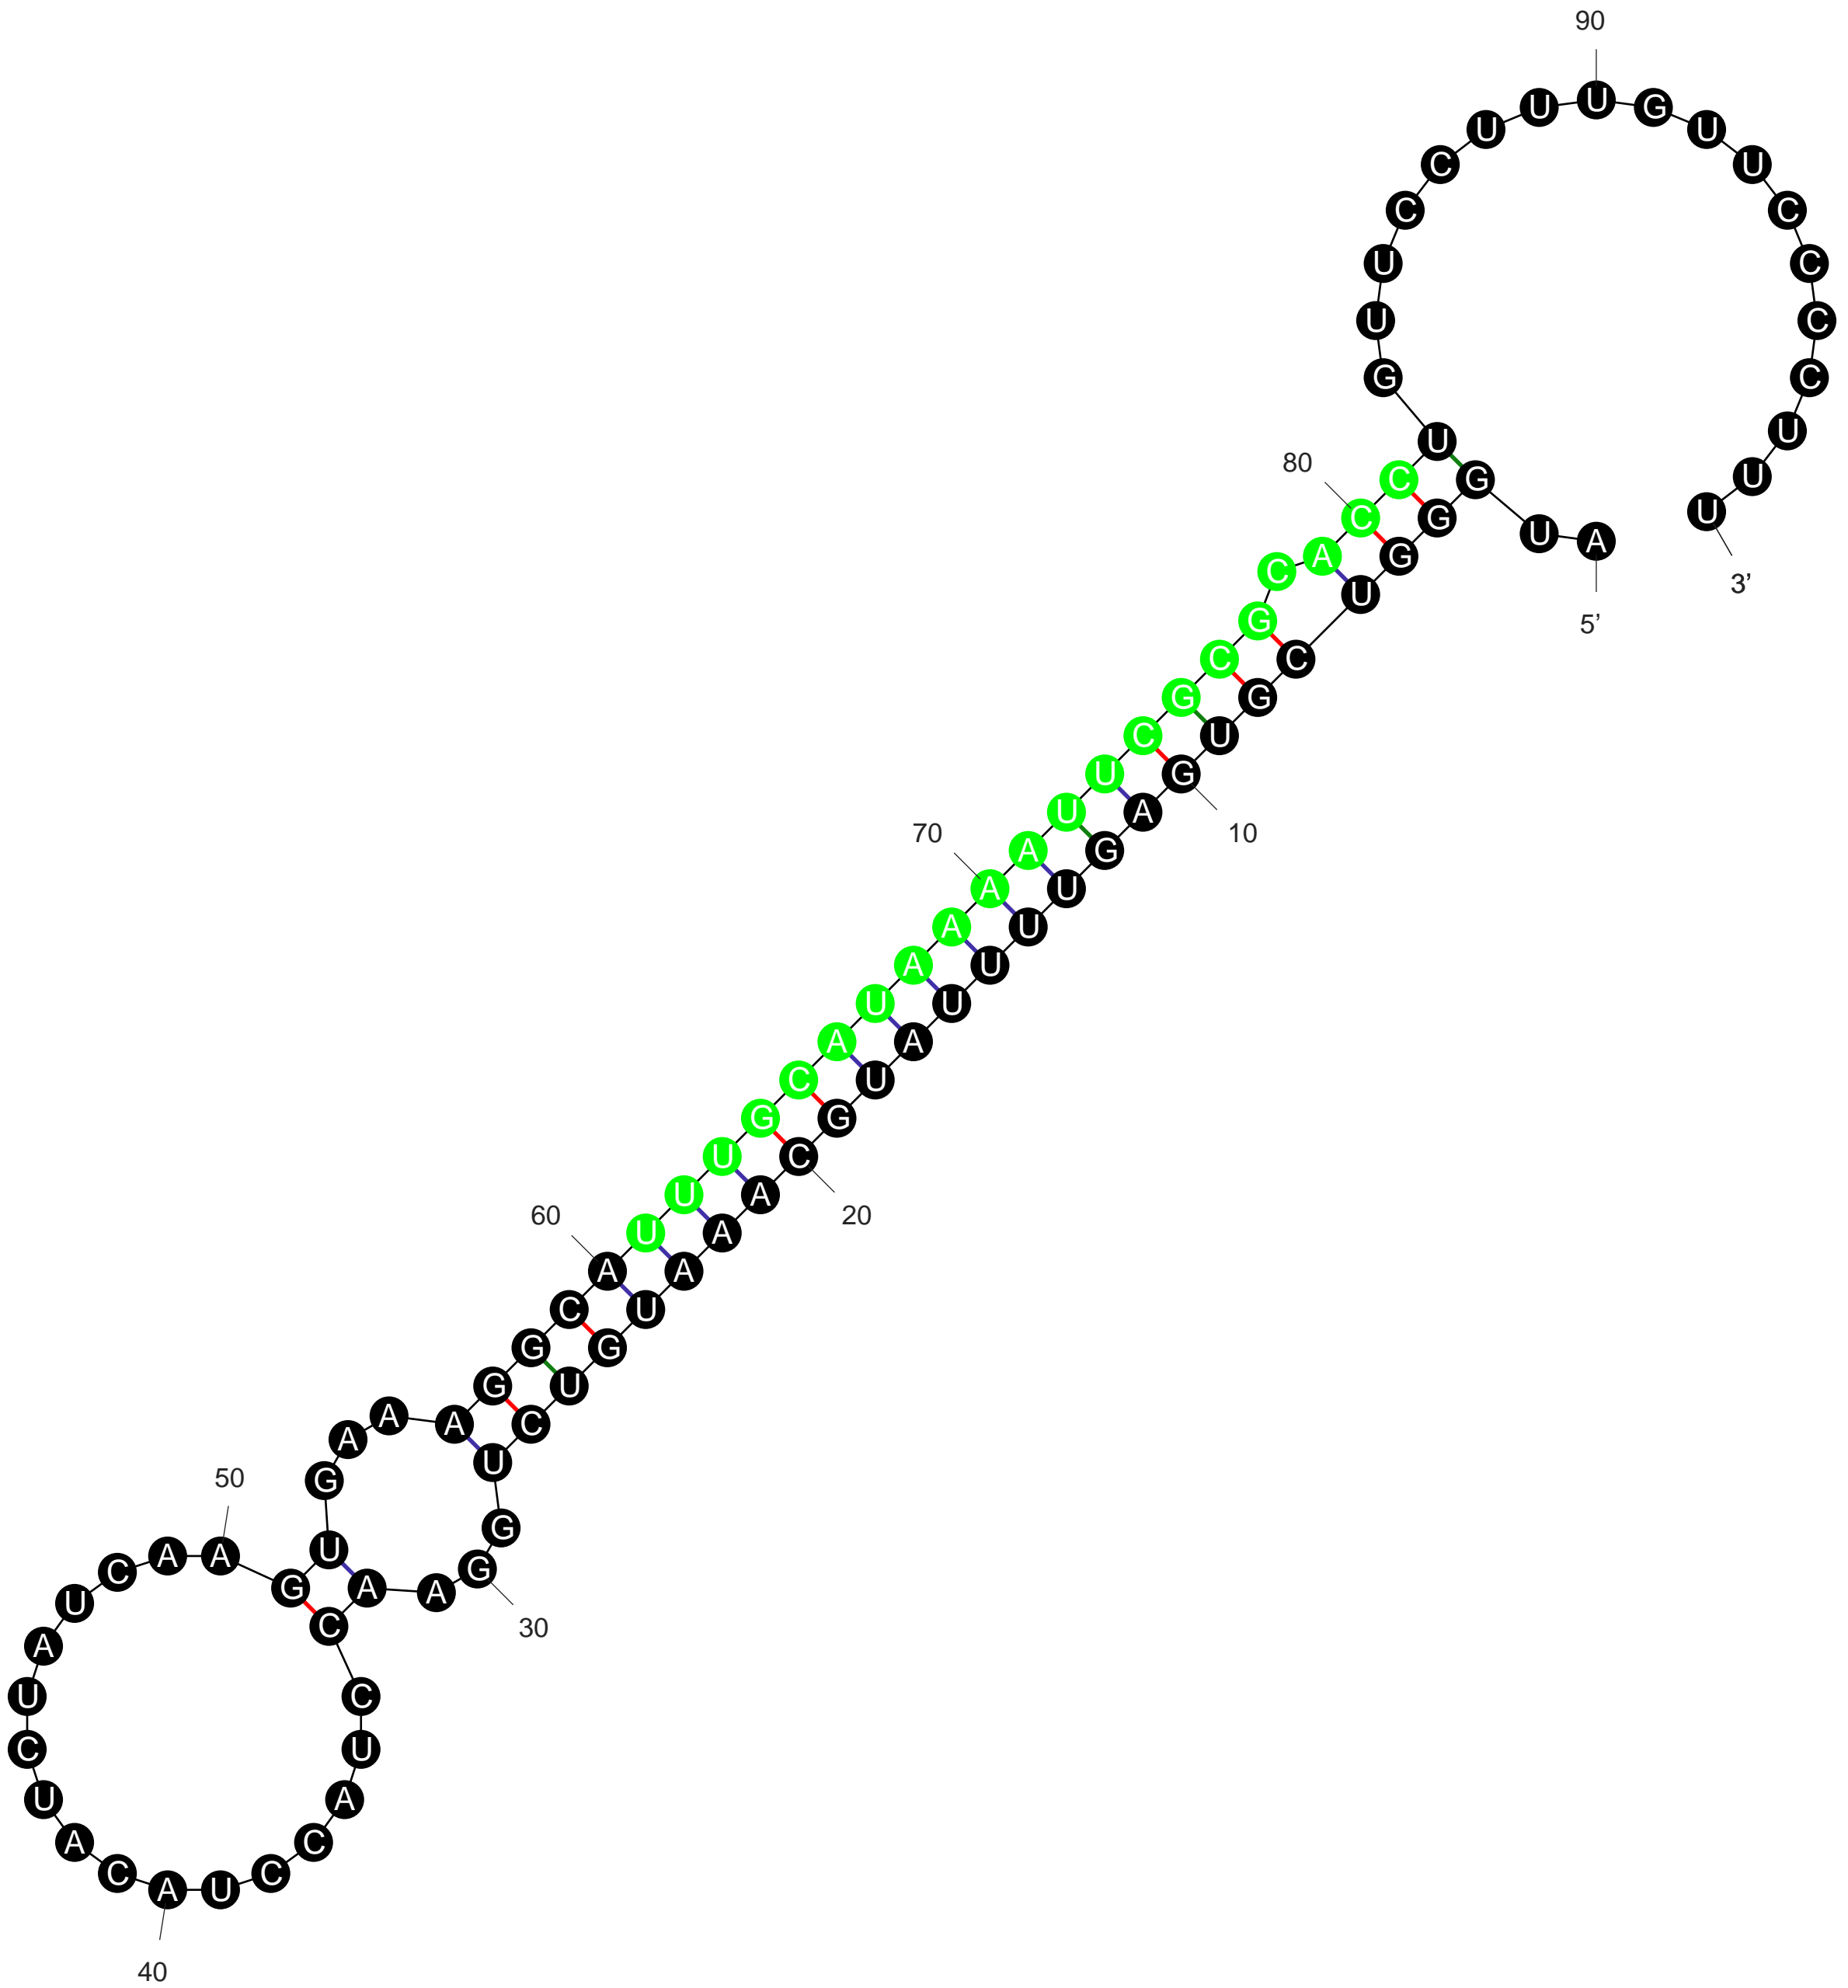

$dG = -33.10$  nta-miRn68



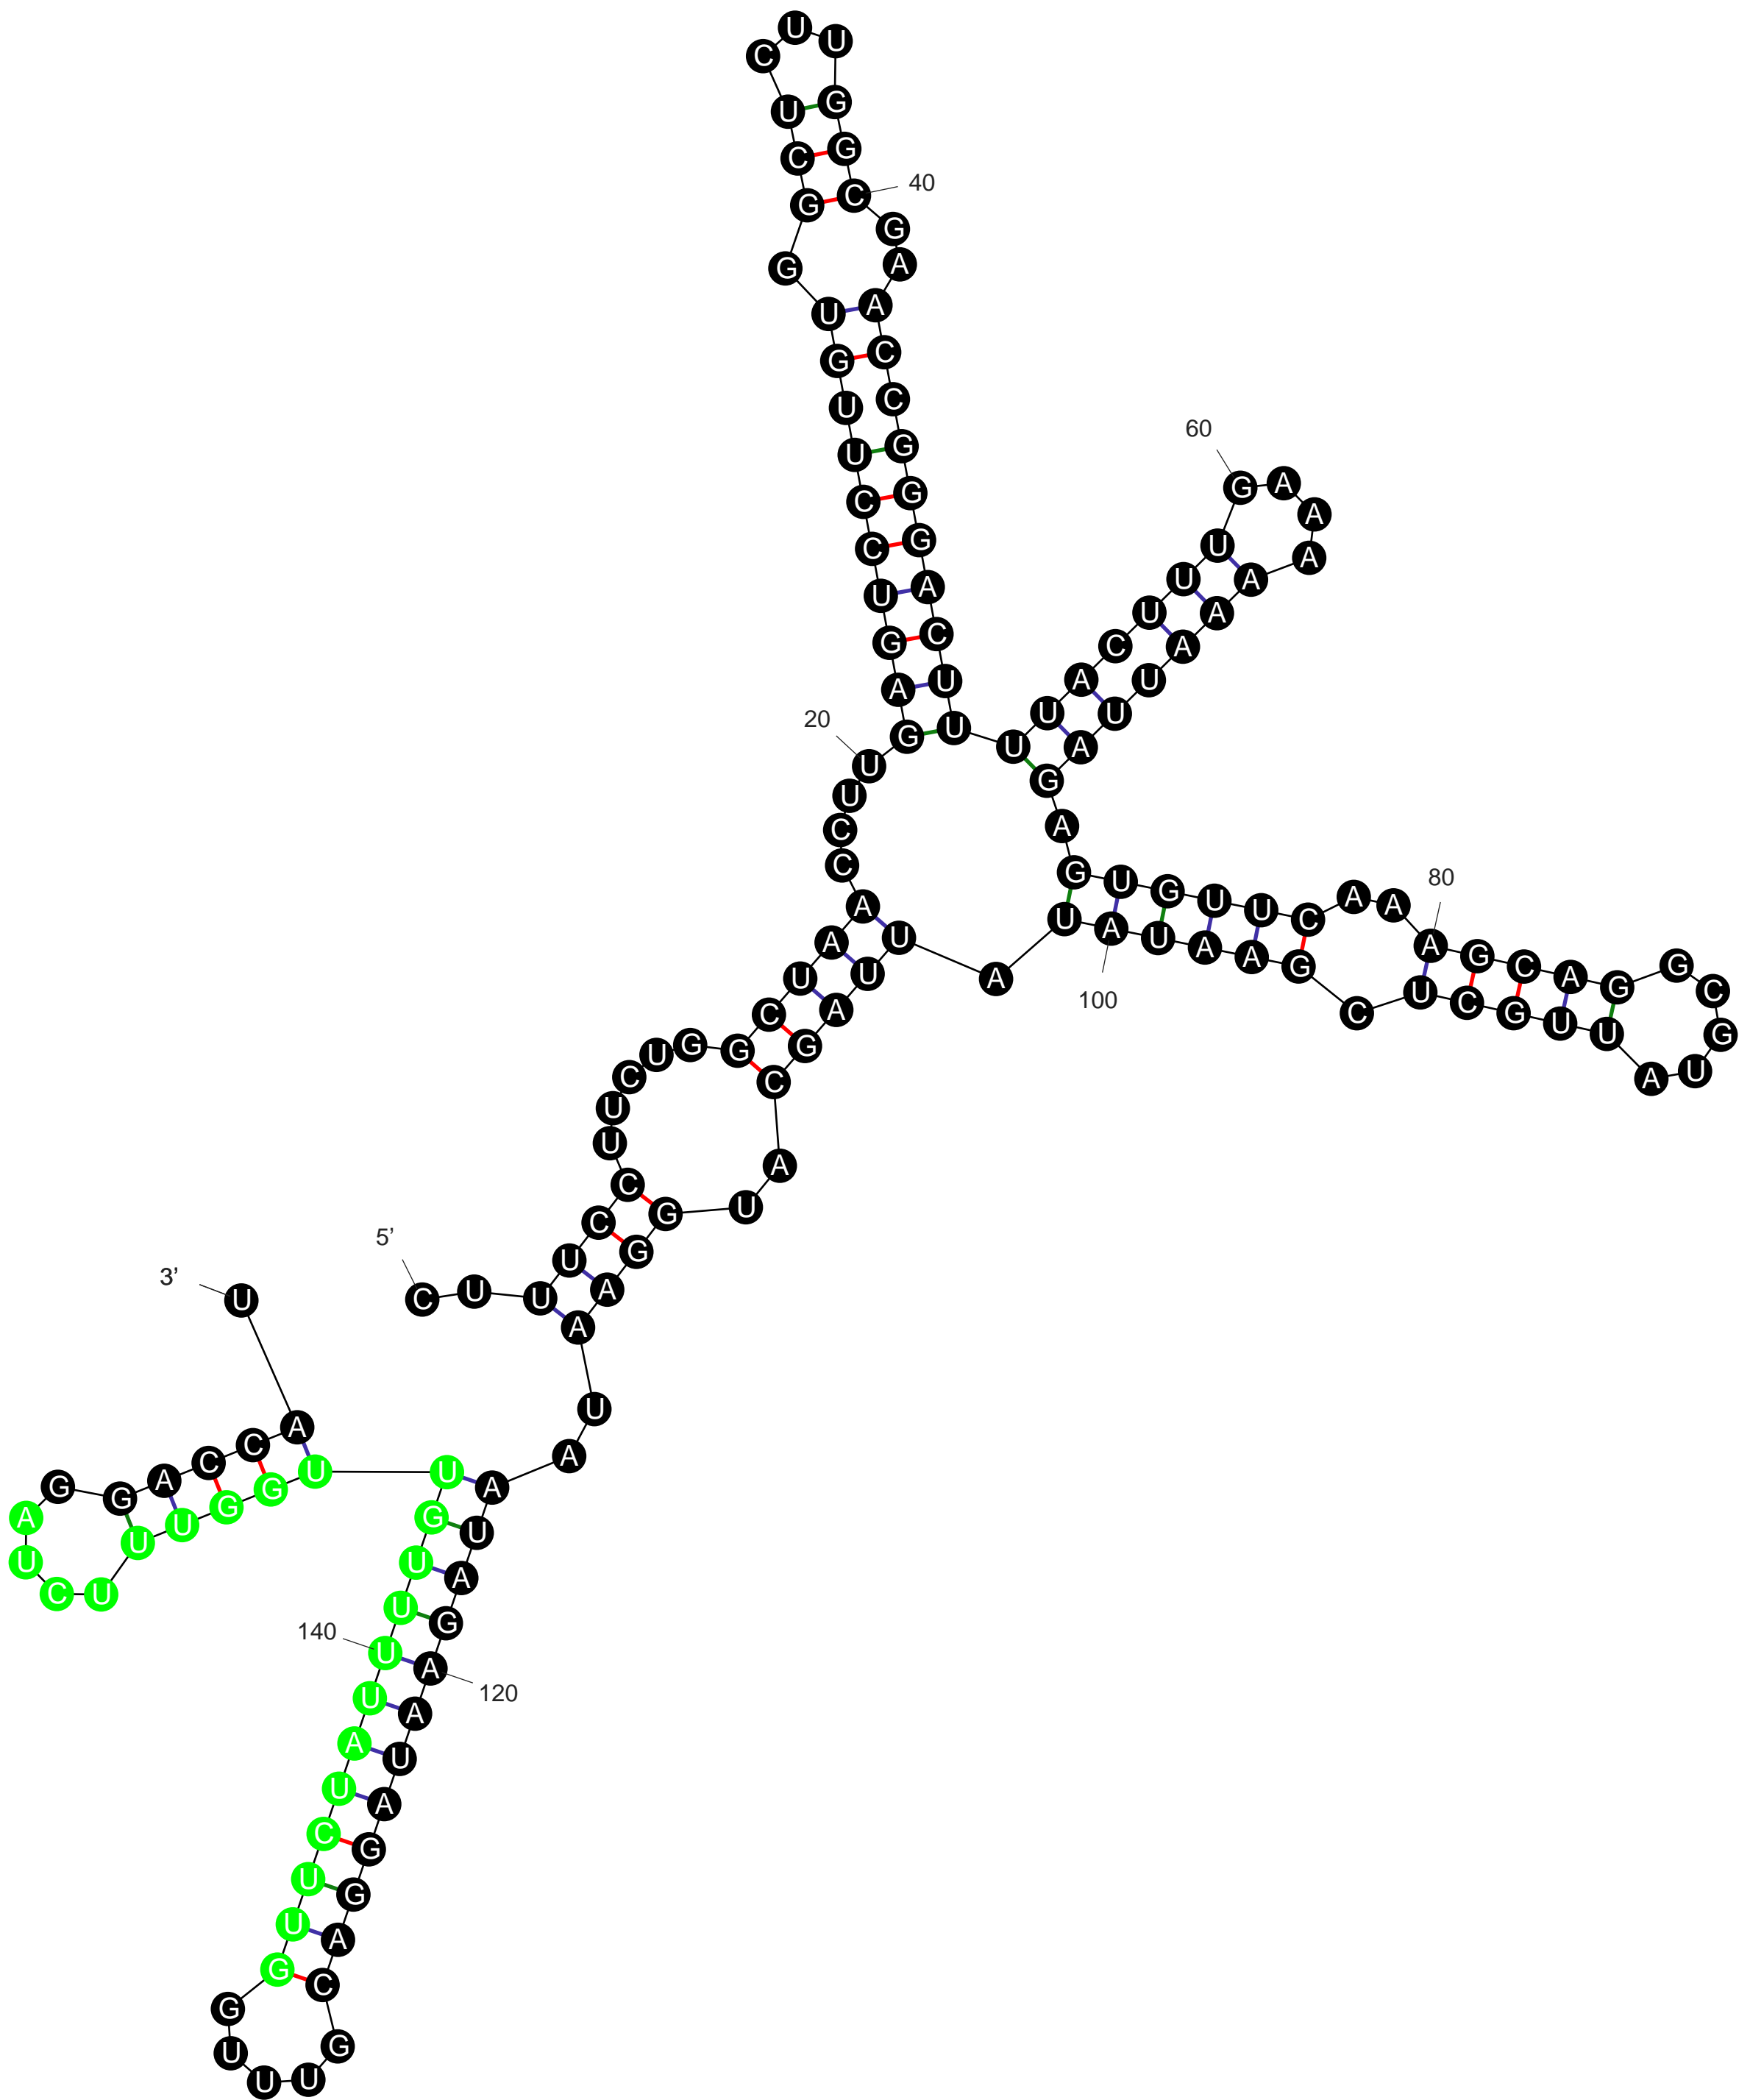

$dG = -44.50$  nta-miRn70

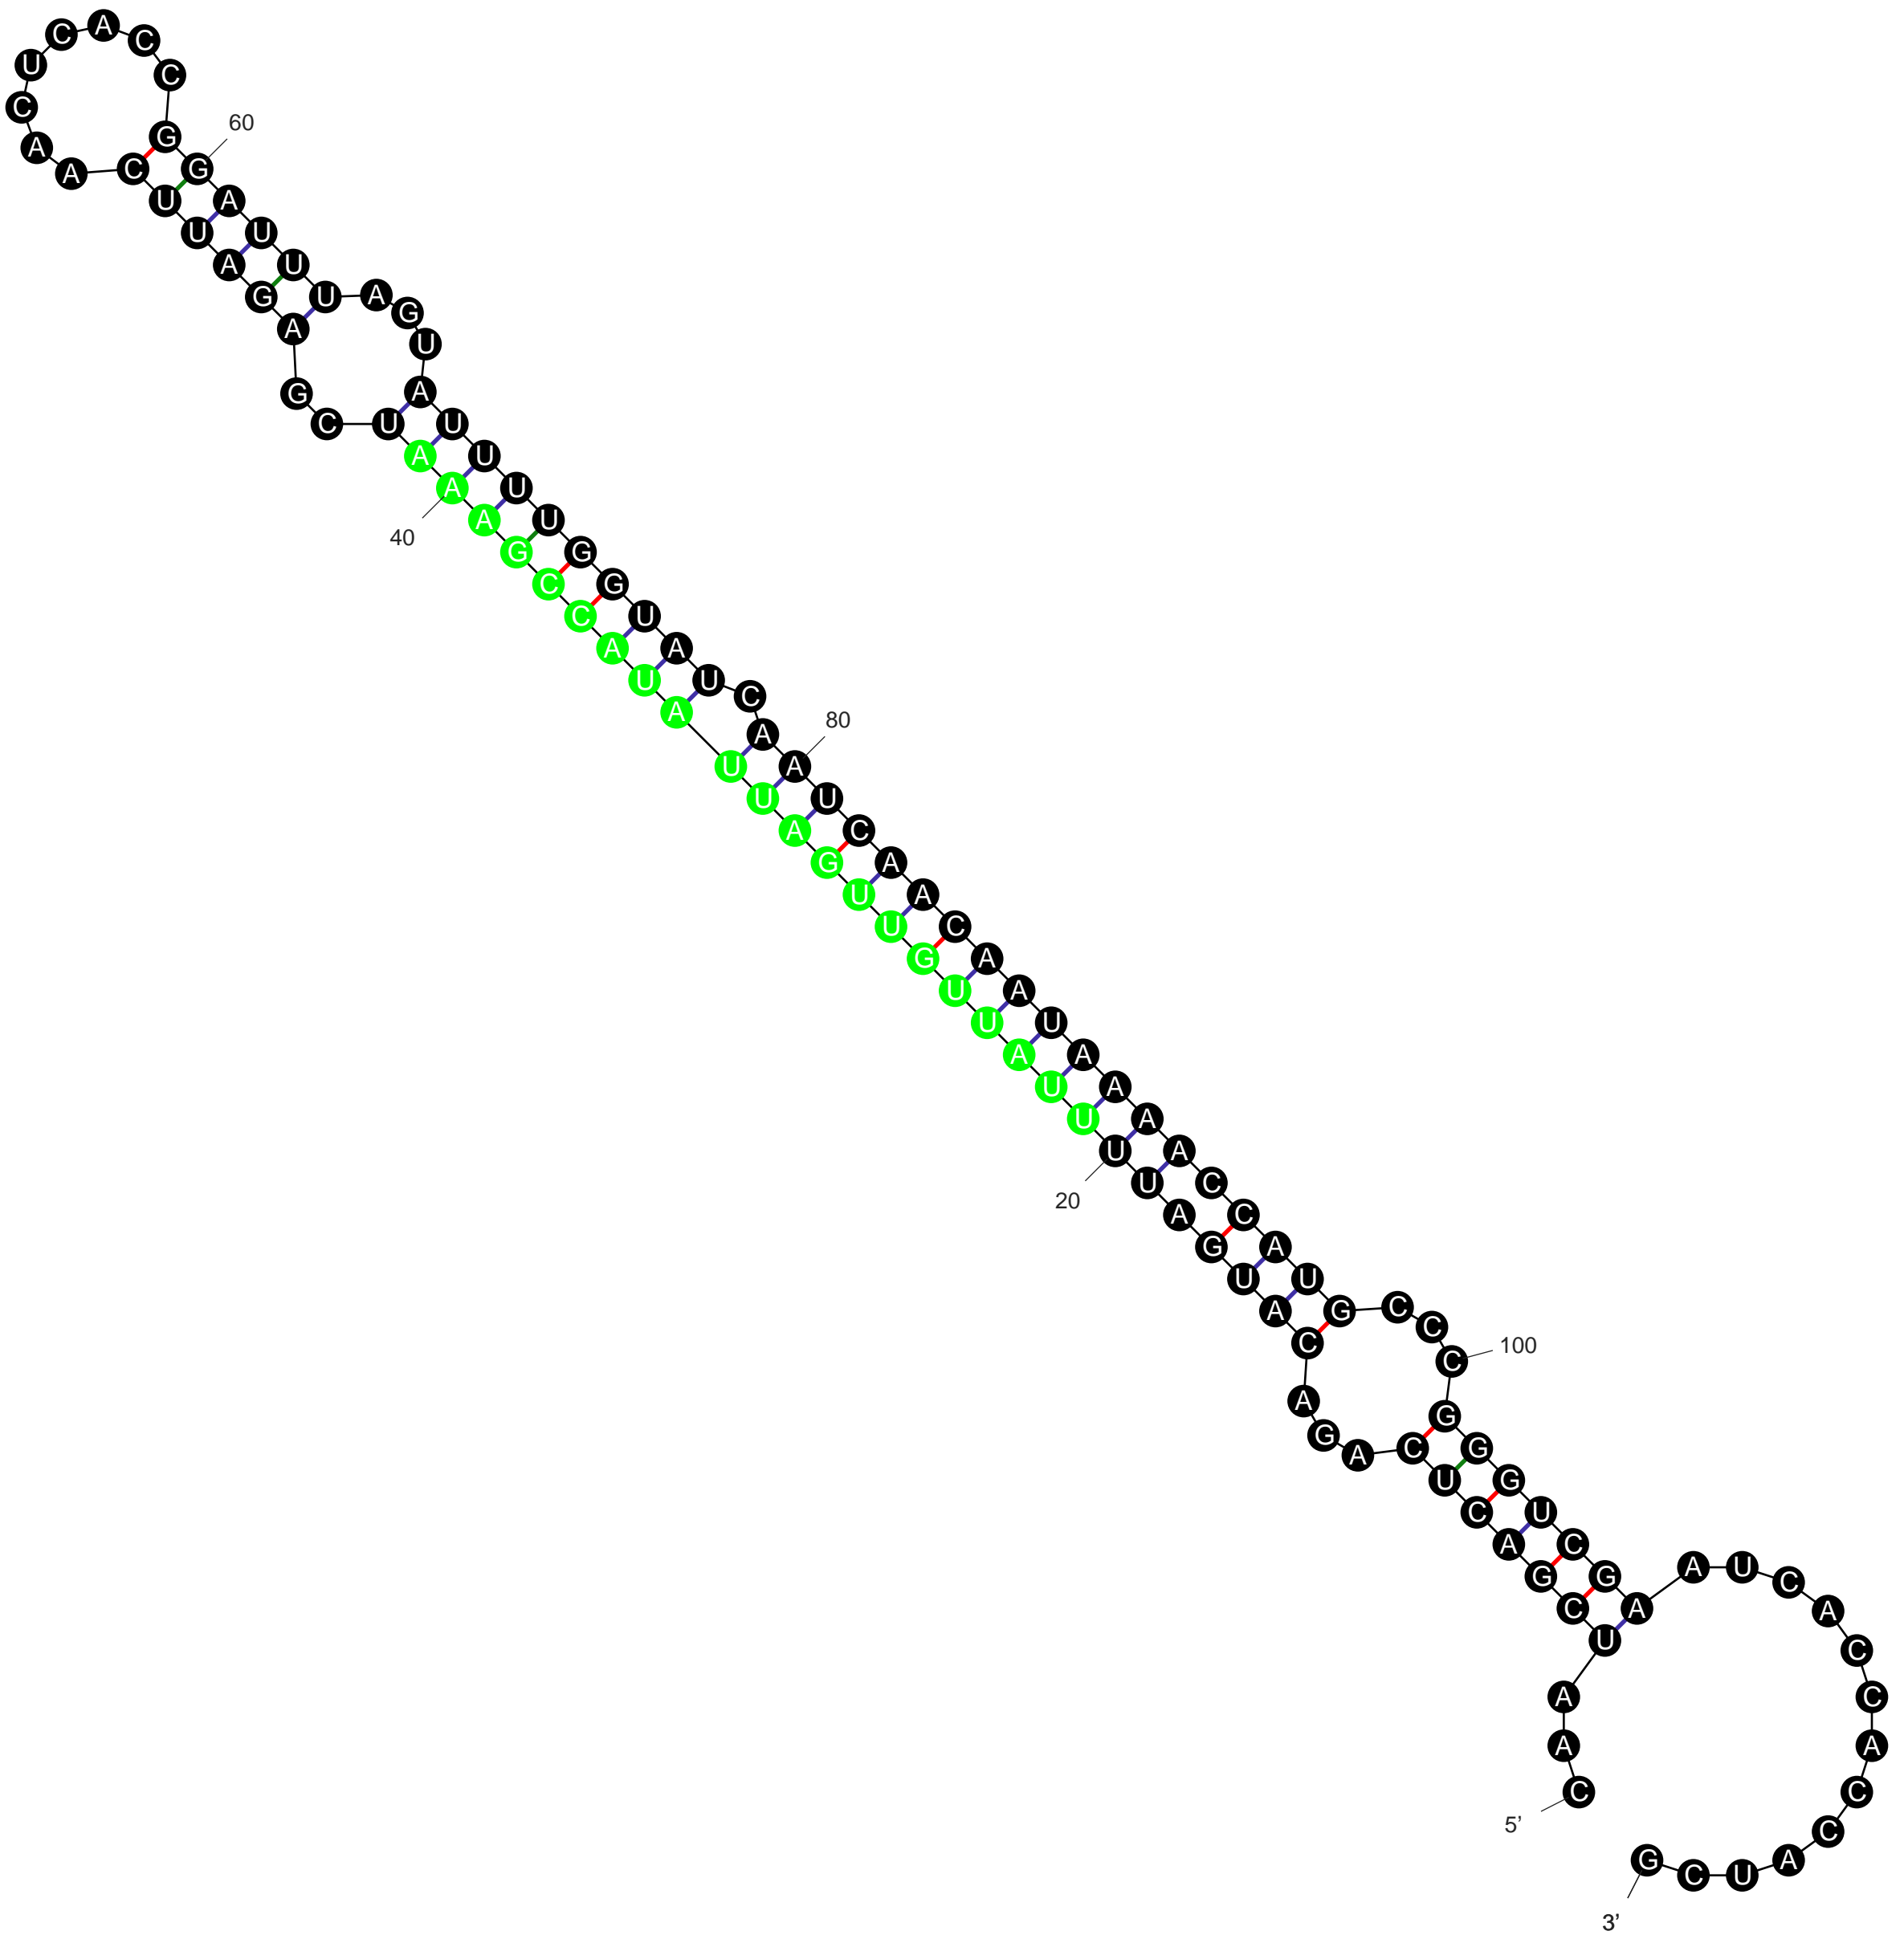

$dG = -39.10$  nta-miRn71

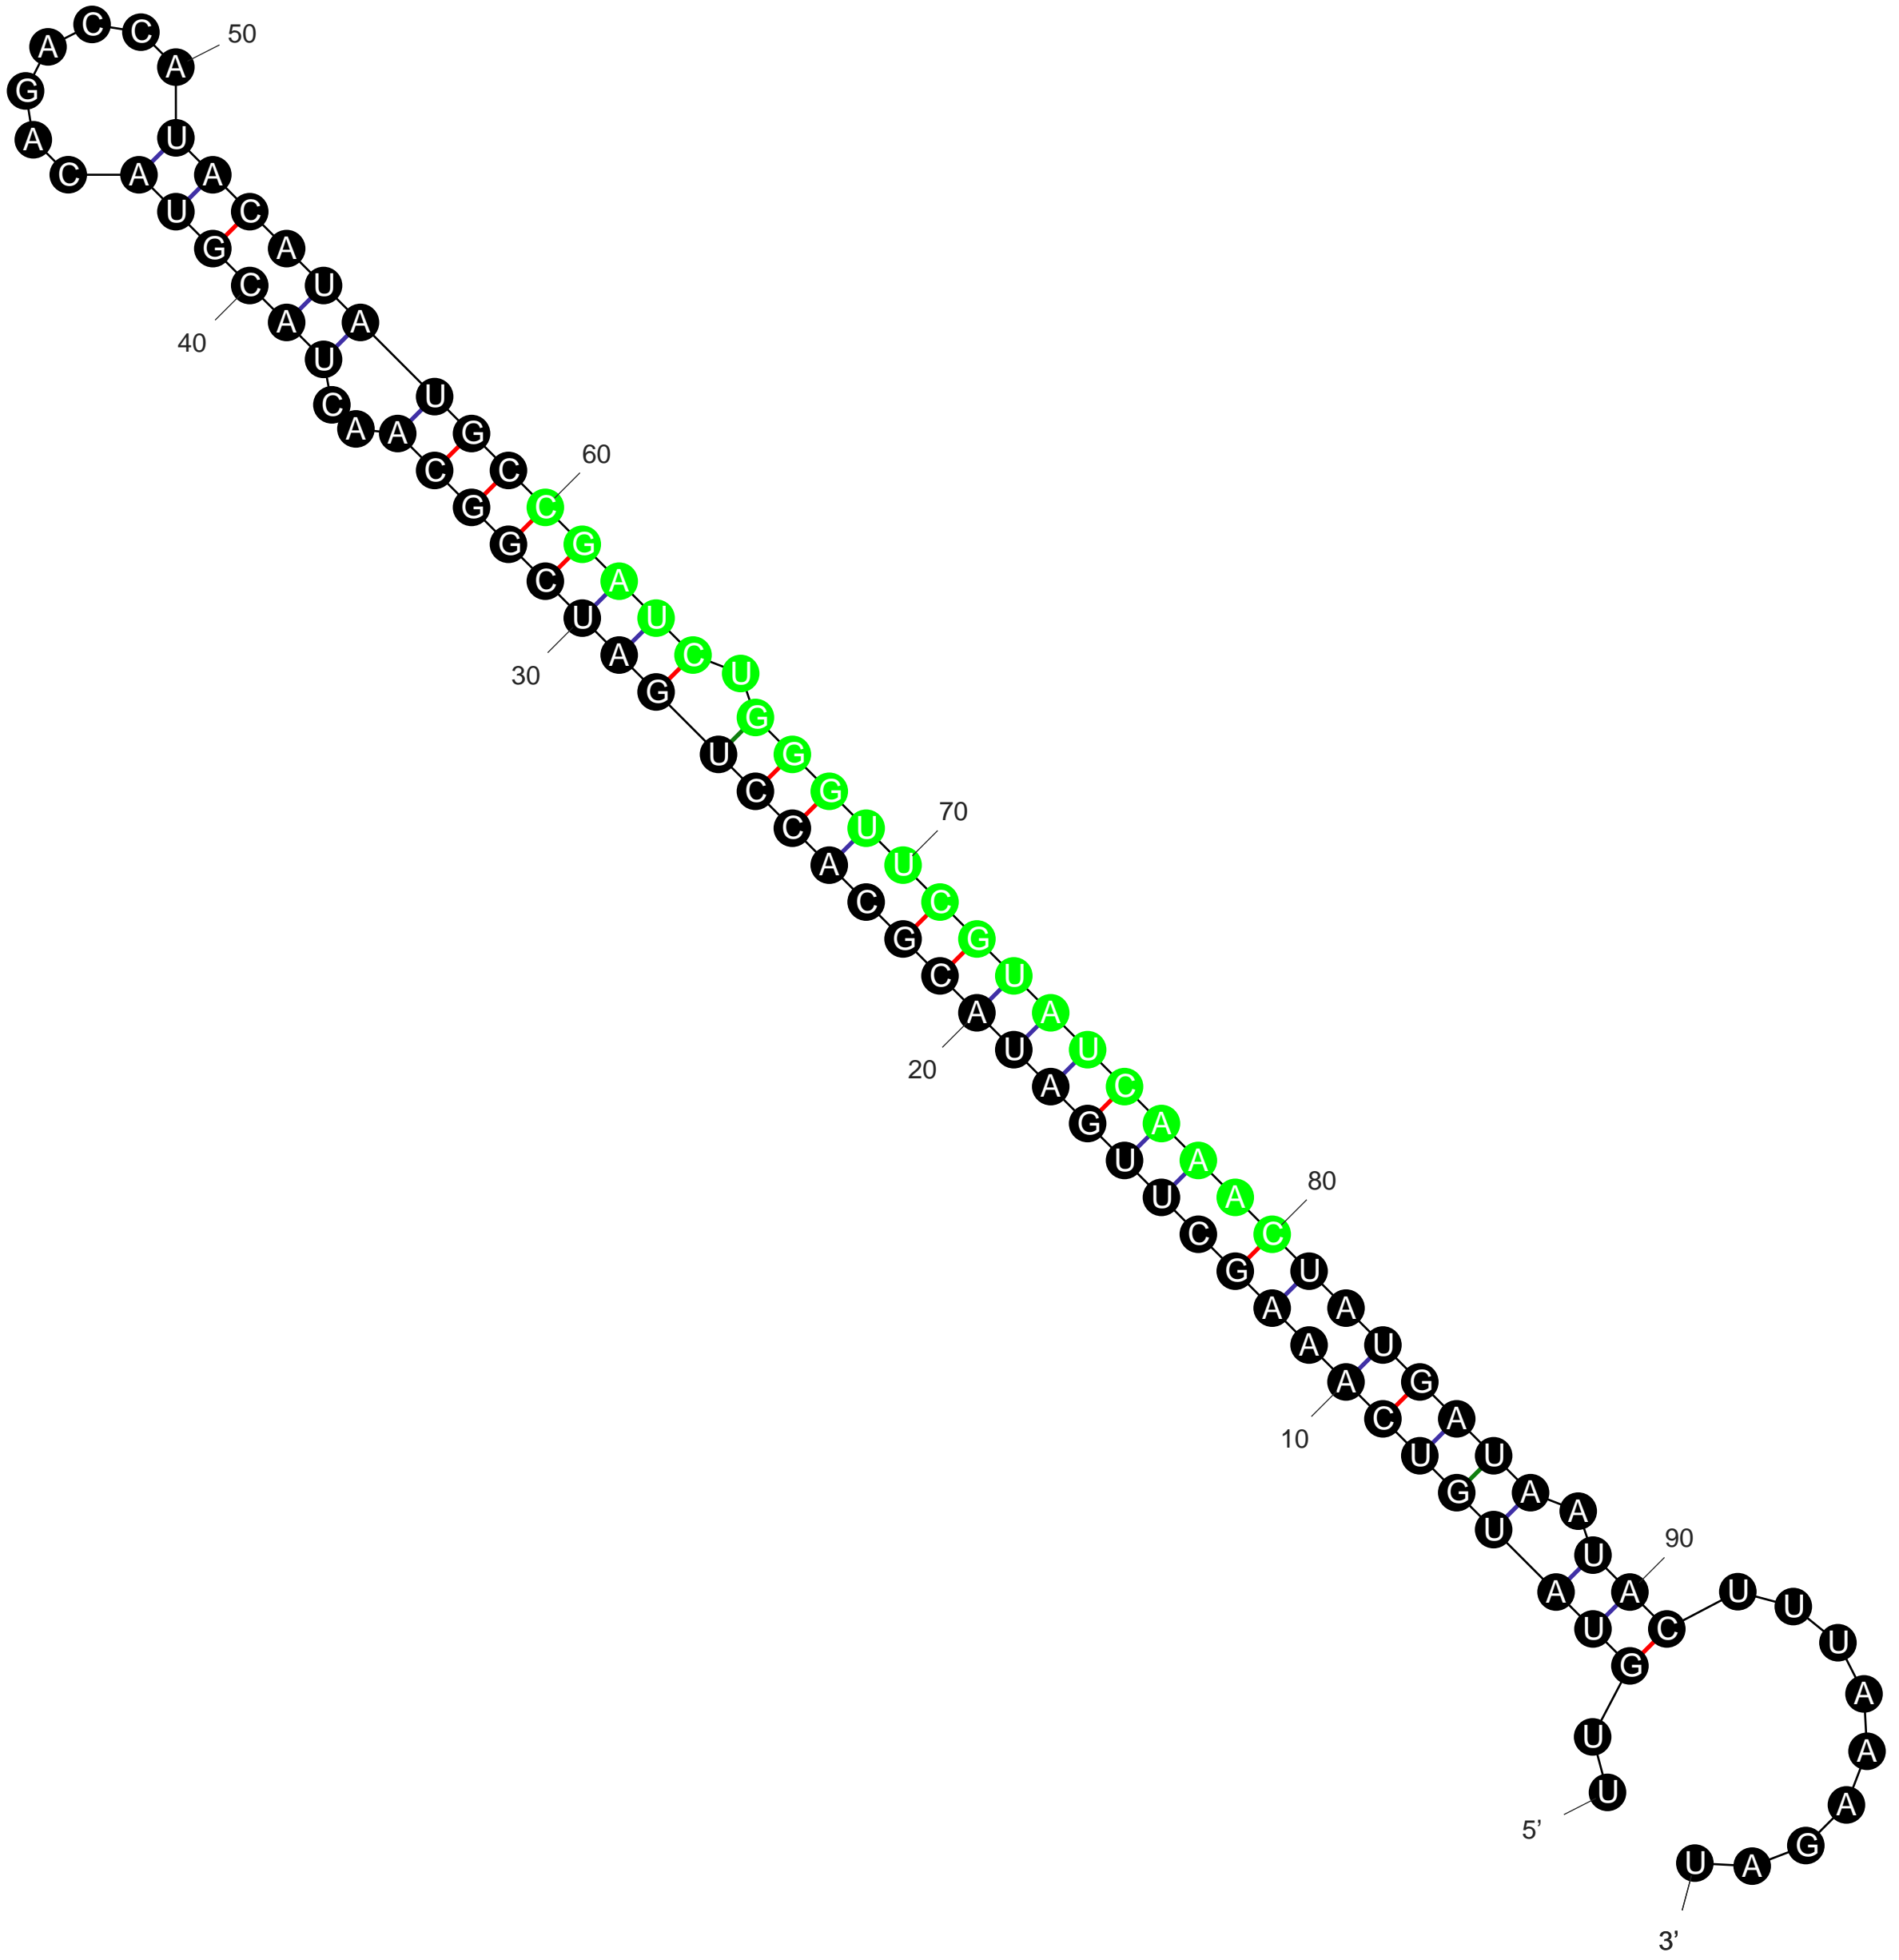

$dG = -33.60$  nta-miRn72

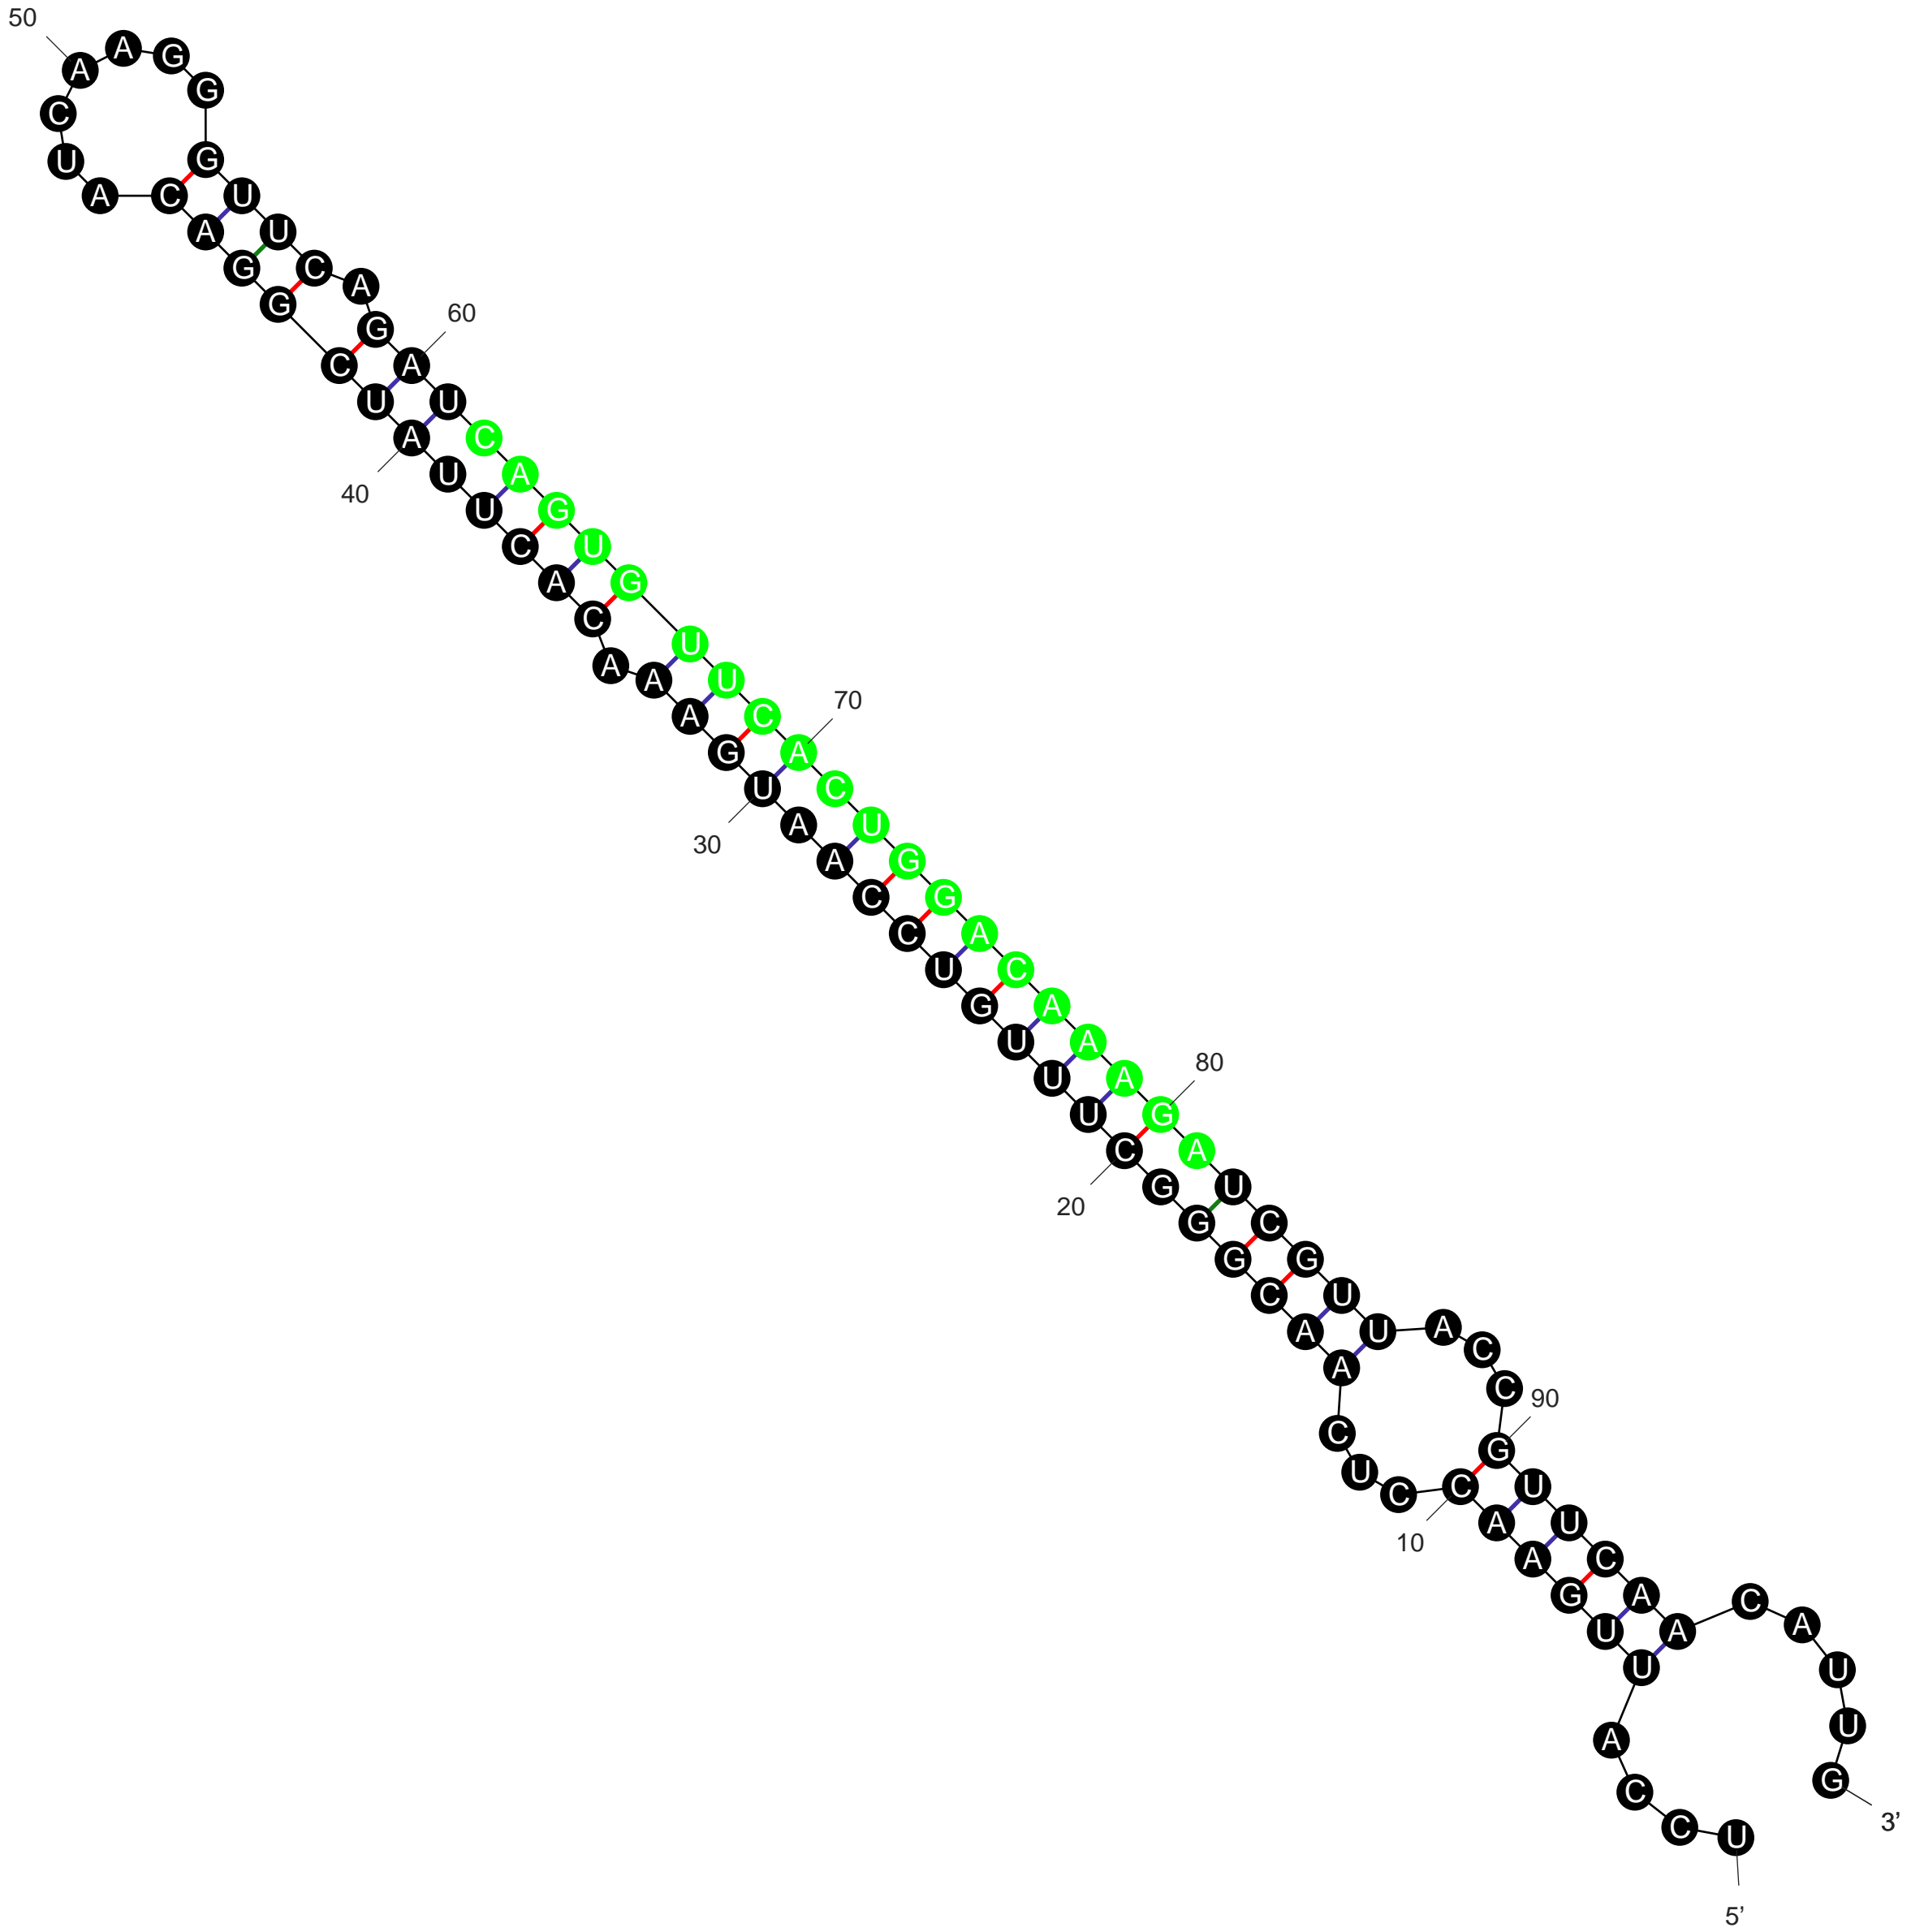

$dG = -35.80$  nta-miRn73

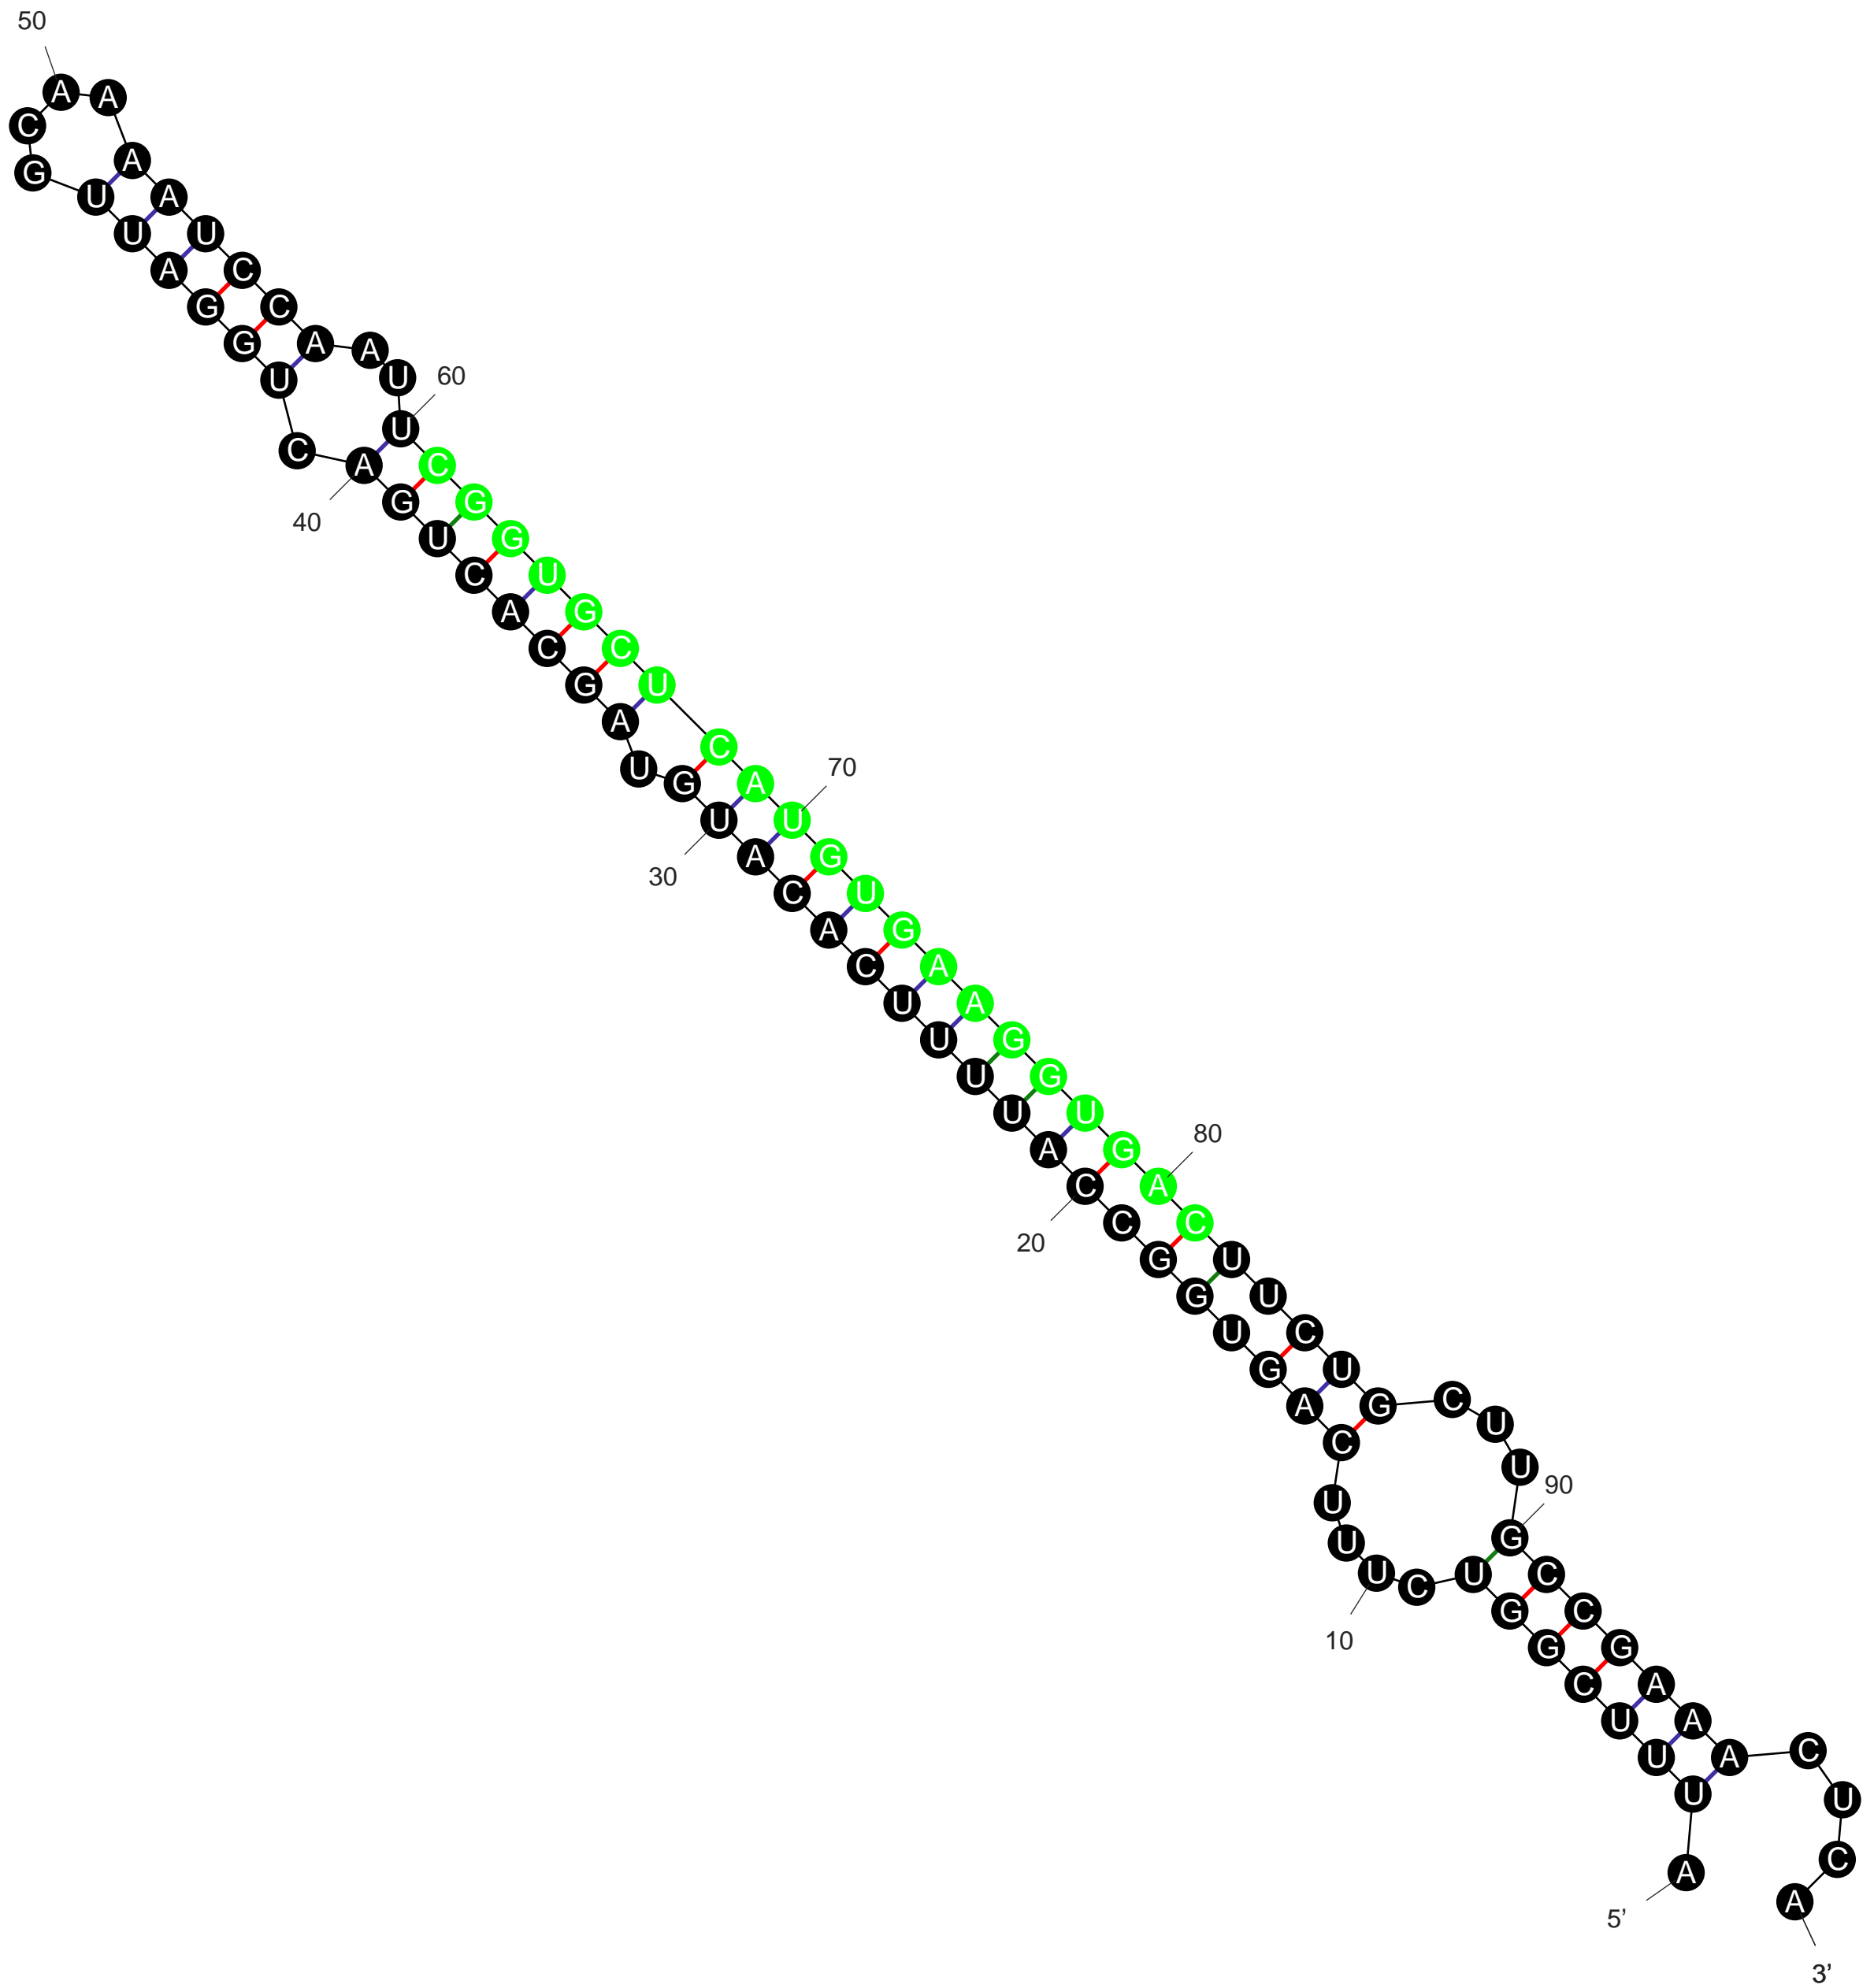

$dG = -44.40$  nta-miRn74





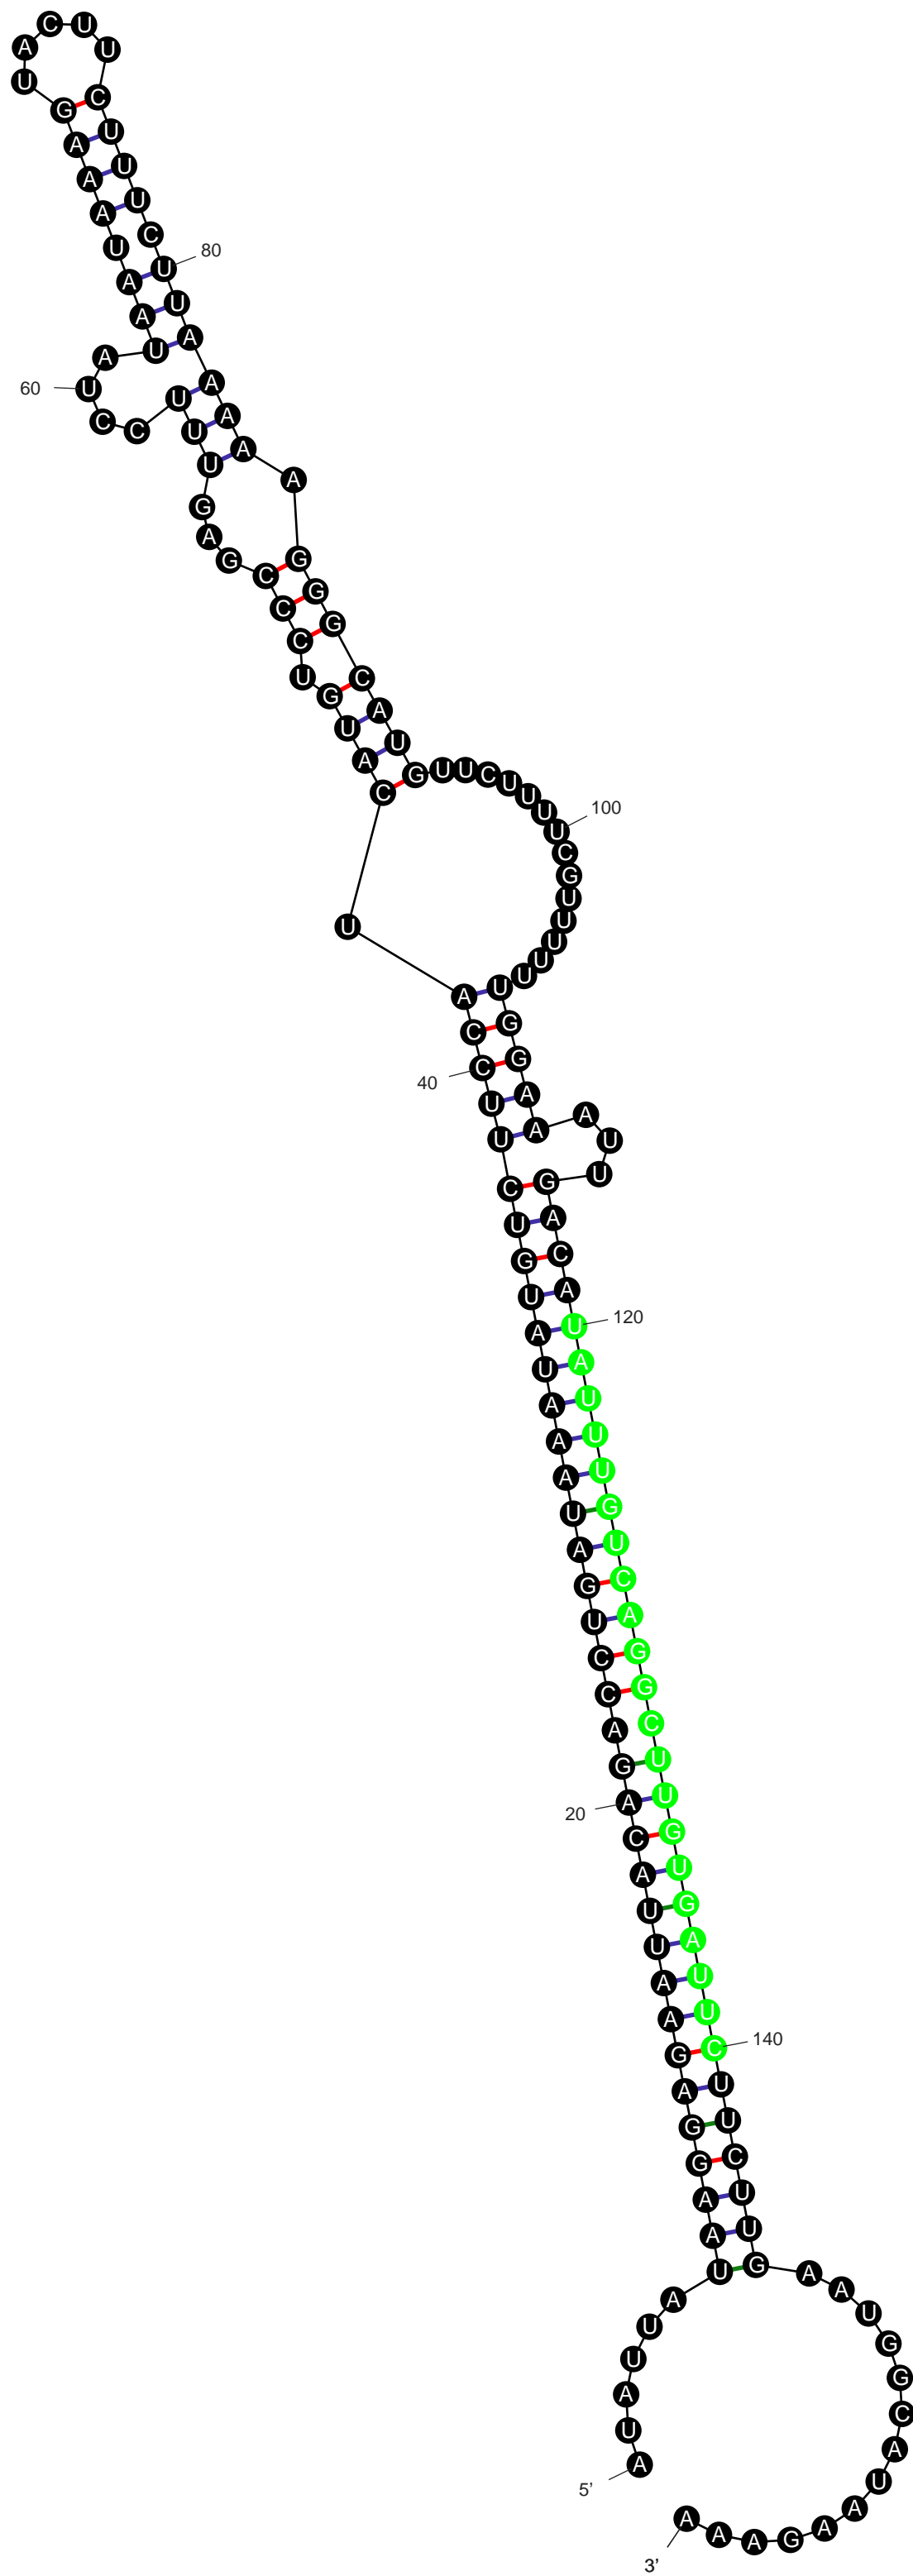

$dG = -46.60$  nta-miRn76

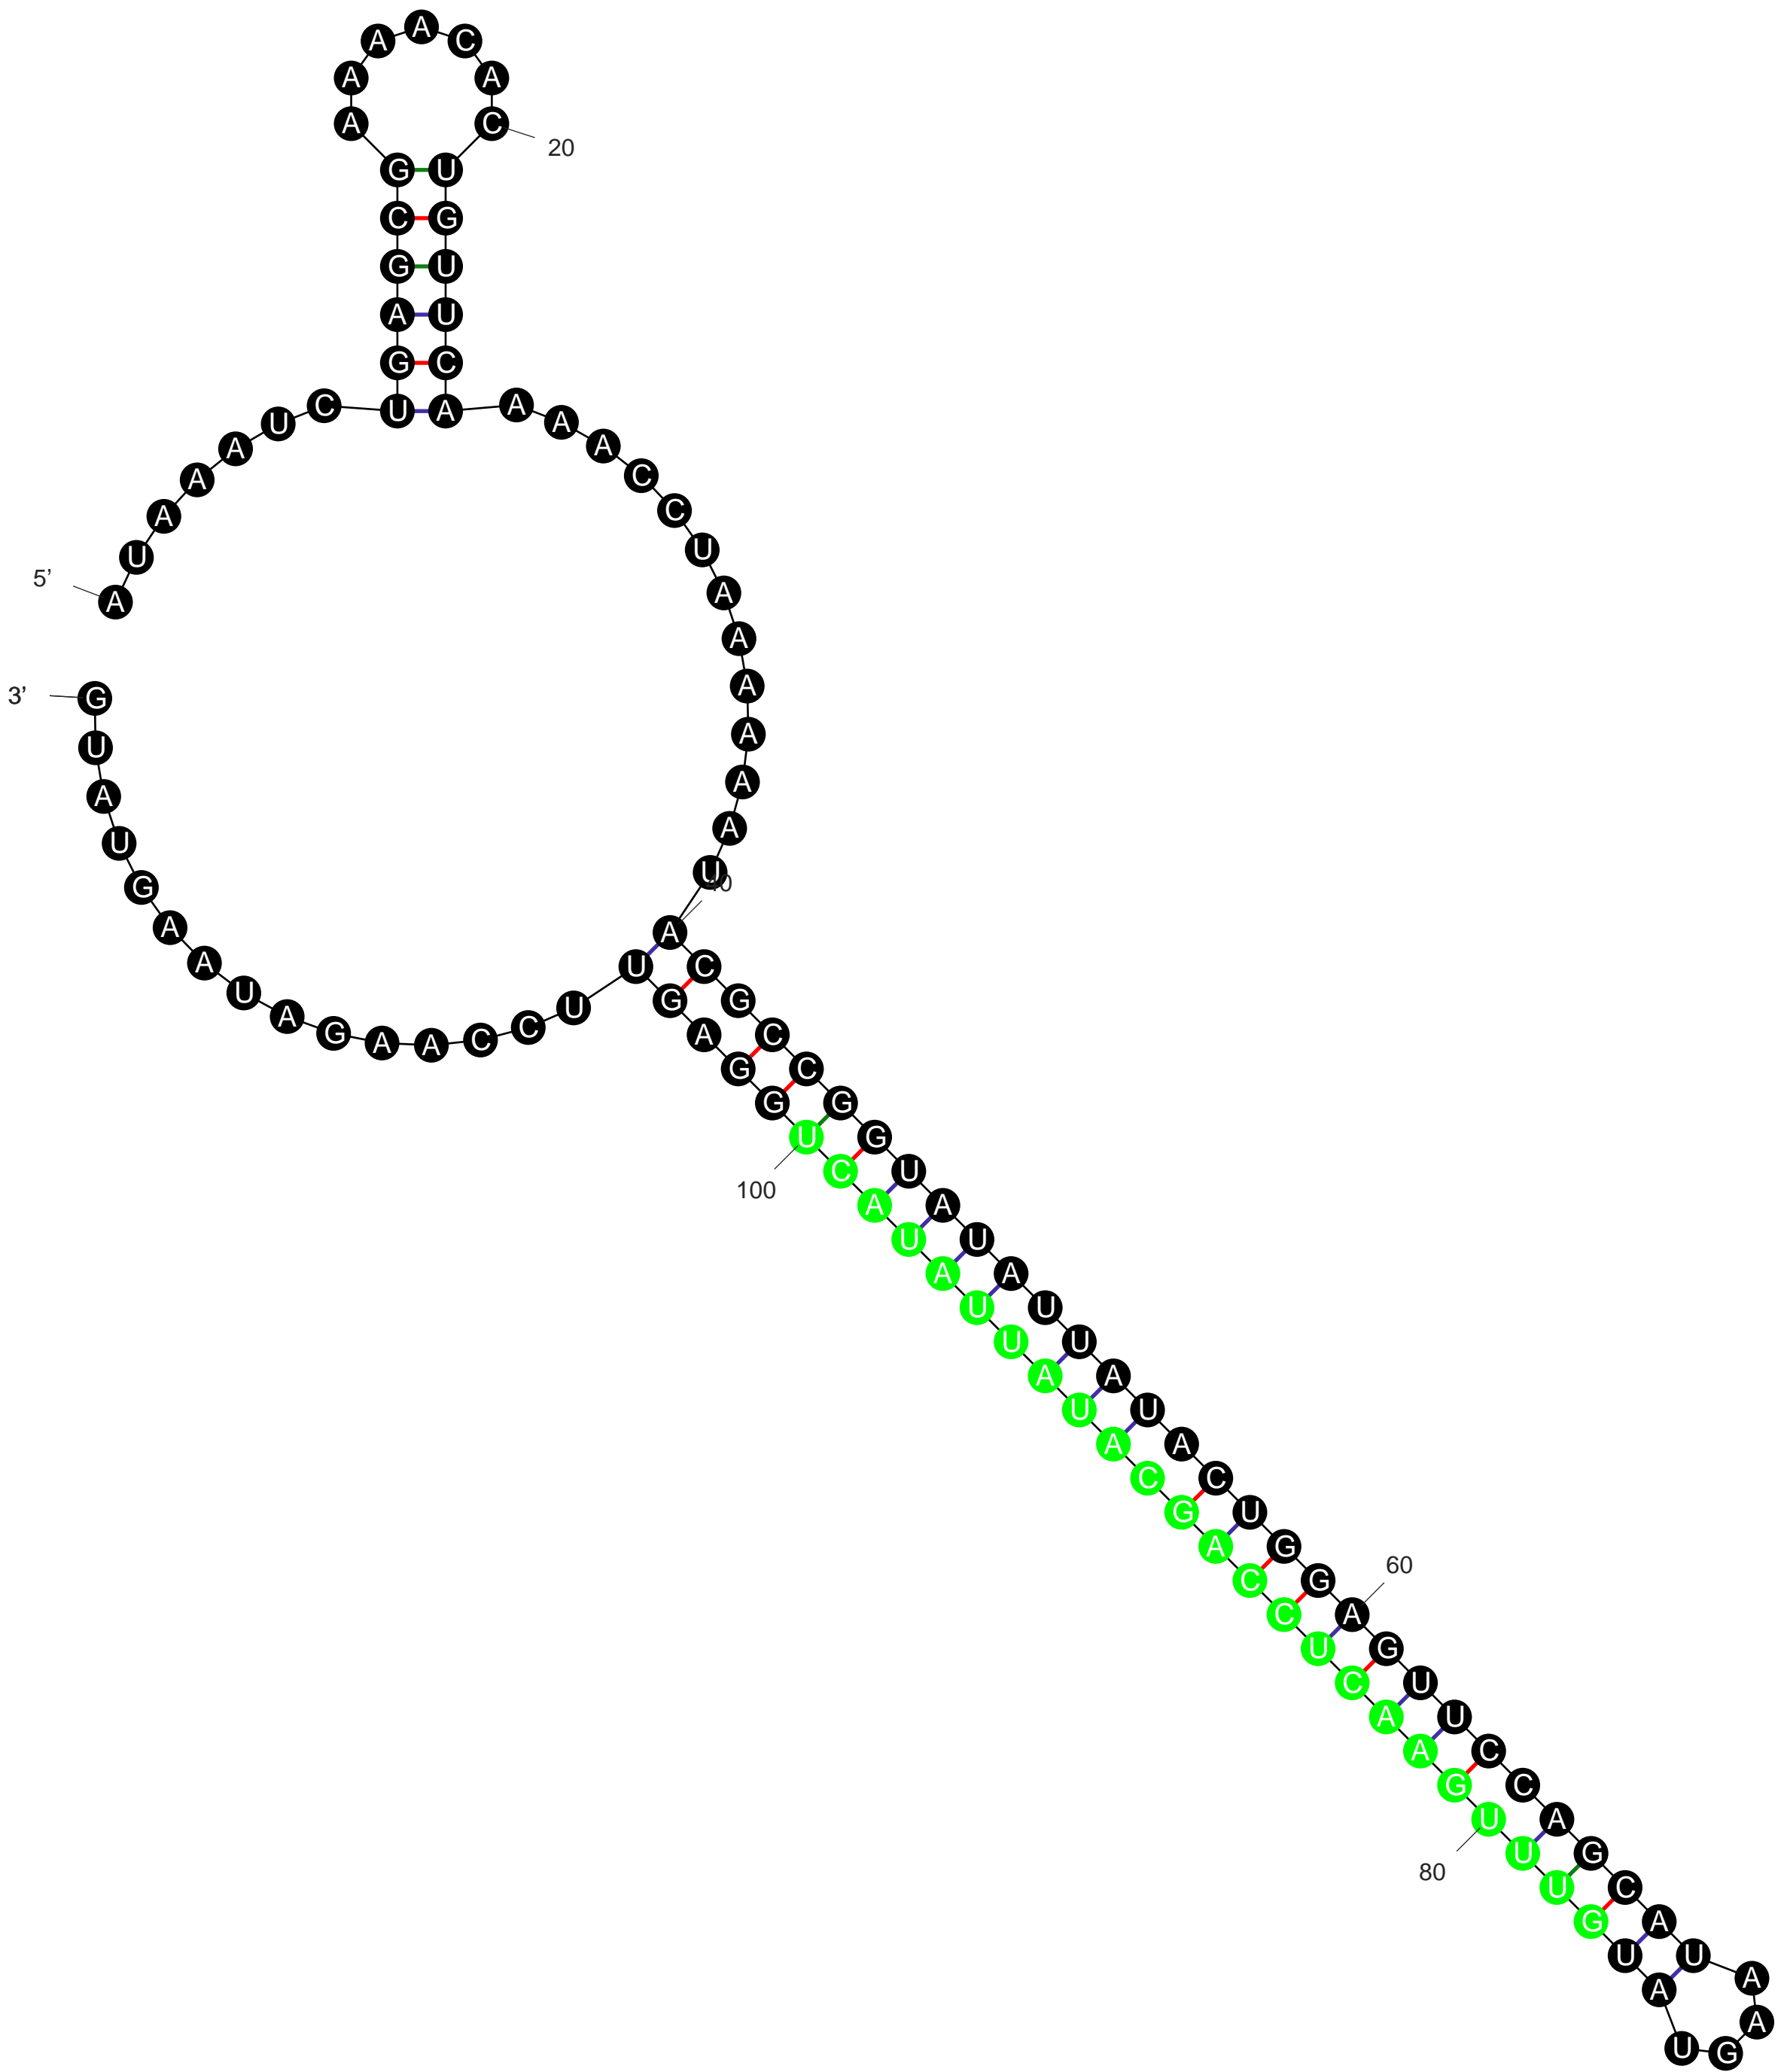

dG = -34.20 nta-miRn77a
